# Supplementary material for: Focus on Hyperparasites: Biotic and Abiotic Traits Affecting the Prevalence of Parasitic Microfungi on Bat Ectoparasites
Source: Frontiers journal article supplement (doi:10.3389/fevo.2022.795020), 2022-02-17
Supplement: Table_1.XLSX [file Table_1.XLSX]

## Sheet: Sheet1
Bat.fly_code	Bat.fly_species	Bat.fly_Sex	Laboulbeniales_infection	Date_of_collection	Season	Location	Roost_type	Bat_code	Host_species	H_sex
A0013_1_1	Penicillidia conspicua	M	no	2017-05-02	Sprig	Peștera Măgurici	Cave	A0013	Miniopterus schreibersii	F
A0013_1_2	Penicillidia conspicua	M	no	2017-05-02	Sprig	Peștera Măgurici	Cave	A0013	Miniopterus schreibersii	F
A0014_1_1	Nycteribia schmidlii	F	no	2017-05-02	Sprig	Peștera Măgurici	Cave	A0014	Miniopterus schreibersii	F
A0015_1_1	Penicillidia conspicua	M	no	2017-05-02	Sprig	Peștera Măgurici	Cave	A0015	Miniopterus schreibersii	F
A0015_2_1	Nycteribia schmidlii	F	no	2017-05-02	Sprig	Peștera Măgurici	Cave	A0015	Miniopterus schreibersii	F
A0021_1_1	Penicillidia dufourii	M	no	2017-05-02	Sprig	Peștera Măgurici	Cave	A0021	Miniopterus schreibersii	F
A0022_1_1	Nycteribia schmidlii	F	no	2017-05-02	Sprig	Peștera Măgurici	Cave	A0022	Miniopterus schreibersii	M
A0023_1_1	Nycteribia schmidlii	F	yes	2017-05-02	Sprig	Peștera Măgurici	Cave	A0023	Miniopterus schreibersii	F
A0024_1_1	Nycteribia schmidlii	M	no	2017-05-02	Sprig	Peștera Măgurici	Cave	A0024	Miniopterus schreibersii	M
A0024_2_1	Nycteribia schmidlii	F	no	2017-05-02	Sprig	Peștera Măgurici	Cave	A0024	Miniopterus schreibersii	M
A0025_1_1	Penicillidia conspicua	M	no	2017-05-02	Sprig	Peștera Măgurici	Cave	A0025	Miniopterus schreibersii	F
A0027_1_1	Penicillidia dufourii	F	no	2017-05-02	Sprig	Peștera Măgurici	Cave	A0027	Miniopterus schreibersii	F
A0028_1_1	Penicillidia dufourii	F	no	2017-05-02	Sprig	Peștera Măgurici	Cave	A0028	Miniopterus schreibersii	F
A0031_1_1	Nycteribia schmidlii	M	no	2017-05-02	Sprig	Peștera Măgurici	Cave	A0031	Miniopterus schreibersii	F
A0031_2_1	Penicillidia dufourii	F	no	2017-05-02	Sprig	Peștera Măgurici	Cave	A0031	Miniopterus schreibersii	F
A0031_3_1	Penicillidia conspicua	F	no	2017-05-02	Sprig	Peștera Măgurici	Cave	A0031	Miniopterus schreibersii	F
A0033_1_1	Penicillidia dufourii	M	no	2017-05-02	Sprig	Peștera Măgurici	Cave	A0033	Miniopterus schreibersii	F
A0033_1_2	Penicillidia dufourii	M	no	2017-05-02	Sprig	Peștera Măgurici	Cave	A0033	Miniopterus schreibersii	F
A0033_1_3	Penicillidia dufourii	M	no	2017-05-02	Sprig	Peștera Măgurici	Cave	A0033	Miniopterus schreibersii	F
A0033_1_4	Penicillidia dufourii	M	no	2017-05-02	Sprig	Peștera Măgurici	Cave	A0033	Miniopterus schreibersii	F
A0033_2_1	Penicillidia dufourii	F	no	2017-05-02	Sprig	Peștera Măgurici	Cave	A0033	Miniopterus schreibersii	F
A0033_2_2	Penicillidia dufourii	F	no	2017-05-02	Sprig	Peștera Măgurici	Cave	A0033	Miniopterus schreibersii	F
A0033_2_3	Penicillidia dufourii	F	no	2017-05-02	Sprig	Peștera Măgurici	Cave	A0033	Miniopterus schreibersii	F
A0035_1_1	Nycteribia schmidlii	F	no	2017-05-02	Sprig	Peștera Măgurici	Cave	A0035	Miniopterus schreibersii	M
A0039_1_1	Nycteribia schmidlii	F	no	2017-05-02	Sprig	Peștera Măgurici	Cave	A0039	Miniopterus schreibersii	F
A0039_1_2	Nycteribia schmidlii	F	no	2017-05-02	Sprig	Peștera Măgurici	Cave	A0039	Miniopterus schreibersii	F
A0040_1_1	Penicillidia conspicua	M	no	2017-05-02	Sprig	Peștera Măgurici	Cave	A0040	Miniopterus schreibersii	F
A0041_1_1	Penicillidia conspicua	M	no	2017-05-02	Sprig	Peștera Măgurici	Cave	A0041	Miniopterus schreibersii	F
A0041_2_1	Nycteribia schmidlii	F	no	2017-05-02	Sprig	Peștera Măgurici	Cave	A0041	Miniopterus schreibersii	F
A0041_2_2	Nycteribia schmidlii	F	no	2017-05-02	Sprig	Peștera Măgurici	Cave	A0041	Miniopterus schreibersii	F
A0041_2_3	Nycteribia schmidlii	F	no	2017-05-02	Sprig	Peștera Măgurici	Cave	A0041	Miniopterus schreibersii	F
A0044_1_1	Penicillidia dufourii	M	no	2017-05-02	Sprig	Peștera Măgurici	Cave	A0044	Miniopterus schreibersii	F
A0044_2_1	Nycteribia schmidlii	F	no	2017-05-02	Sprig	Peștera Măgurici	Cave	A0044	Miniopterus schreibersii	F
A0045_1_1	Penicillidia dufourii	M	no	2017-05-02	Sprig	Peștera Măgurici	Cave	A0045	Miniopterus schreibersii	F
A0045_2_1	Penicillidia dufourii	F	no	2017-05-02	Sprig	Peștera Măgurici	Cave	A0045	Miniopterus schreibersii	F
A0045_3_1	Nycteribia schmidlii	M	no	2017-05-02	Sprig	Peștera Măgurici	Cave	A0045	Miniopterus schreibersii	F
A0047_1_1	Penicillidia conspicua	M	no	2017-05-02	Sprig	Peștera Măgurici	Cave	A0047	Miniopterus schreibersii	M
A0058_1_1	Nycteribia schmidlii	F	no	2017-05-02	Sprig	Peștera Măgurici	Cave	A0058	Miniopterus schreibersii	F
A0058_1_2	Nycteribia schmidlii	F	no	2017-05-02	Sprig	Peștera Măgurici	Cave	A0058	Miniopterus schreibersii	F
A0062_1_1	Penicillidia conspicua	M	no	2017-05-02	Sprig	Peștera Măgurici	Cave	A0062	Miniopterus schreibersii	F
A0062_2_1	Penicillidia dufourii	M	no	2017-05-02	Sprig	Peștera Măgurici	Cave	A0062	Miniopterus schreibersii	F
A0062_3_1	Penicillidia dufourii	F	no	2017-05-02	Sprig	Peștera Măgurici	Cave	A0062	Miniopterus schreibersii	F
A0063_1_1	Nycteribia schmidlii	F	no	2017-05-02	Sprig	Peștera Măgurici	Cave	A0063	Miniopterus schreibersii	F
A0065_1_1	Penicillidia dufourii	M	no	2017-05-02	Sprig	Peștera Măgurici	Cave	A0065	Miniopterus schreibersii	M
A0065_2_1	Penicillidia dufourii	F	no	2017-05-02	Sprig	Peștera Măgurici	Cave	A0065	Miniopterus schreibersii	M
A0066_1_1	Nycteribia vexata	F	no	2017-05-02	Sprig	Peștera Măgurici	Cave	A0066	Myotis blythii	F
A0067_1_1	Penicillidia dufourii	F	no	2017-05-02	Sprig	Peștera Măgurici	Cave	A0067	Myotis blythii	F
A0068_1_1	Penicillidia dufourii	M	no	2017-05-02	Sprig	Peștera Măgurici	Cave	A0068	Myotis blythii	F
A0069_1_1	Penicillidia dufourii	M	no	2017-05-02	Sprig	Peștera Măgurici	Cave	A0069	Myotis myotis	F
A0069_2_1	Nycteribia vexata	F	no	2017-05-02	Sprig	Peștera Măgurici	Cave	A0069	Myotis myotis	F
A0070_1_1	Penicillidia dufourii	F	no	2017-05-02	Sprig	Peștera Măgurici	Cave	A0070	Myotis myotis	F
A0071_1_1	Penicillidia dufourii	F	no	2017-05-02	Sprig	Peștera Măgurici	Cave	A0071	Myotis myotis	F
A0071_1_2	Penicillidia dufourii	F	no	2017-05-02	Sprig	Peștera Măgurici	Cave	A0071	Myotis myotis	F
A0072_1_1	Penicillidia dufourii	M	no	2017-05-02	Sprig	Peștera Măgurici	Cave	A0072	Myotis blythii	F
A0072_1_2	Penicillidia dufourii	M	no	2017-05-02	Sprig	Peștera Măgurici	Cave	A0072	Myotis blythii	F
A0072_1_3	Penicillidia dufourii	M	no	2017-05-02	Sprig	Peștera Măgurici	Cave	A0072	Myotis blythii	F
A0072_1_4	Penicillidia dufourii	M	no	2017-05-02	Sprig	Peștera Măgurici	Cave	A0072	Myotis blythii	F
A0072_1_5	Penicillidia dufourii	M	no	2017-05-02	Sprig	Peștera Măgurici	Cave	A0072	Myotis blythii	F
A0072_1_6	Penicillidia dufourii	M	no	2017-05-02	Sprig	Peștera Măgurici	Cave	A0072	Myotis blythii	F
A0072_2_1	Penicillidia dufourii	F	no	2017-05-02	Sprig	Peștera Măgurici	Cave	A0072	Myotis blythii	F
A0072_2_2	Penicillidia dufourii	F	no	2017-05-02	Sprig	Peștera Măgurici	Cave	A0072	Myotis blythii	F
A0072_2_3	Penicillidia dufourii	F	no	2017-05-02	Sprig	Peștera Măgurici	Cave	A0072	Myotis blythii	F
A0072_3_1	Nycteribia vexata	M	no	2017-05-02	Sprig	Peștera Măgurici	Cave	A0072	Myotis blythii	F
A0073_1_1	Nycteribia vexata	M	no	2017-05-02	Sprig	Peștera Măgurici	Cave	A0073	Myotis blythii	F
A0073_2_1	Nycteribia vexata	F	no	2017-05-02	Sprig	Peștera Măgurici	Cave	A0073	Myotis blythii	F
A0073_2_2	Nycteribia vexata	F	no	2017-05-02	Sprig	Peștera Măgurici	Cave	A0073	Myotis blythii	F
A0116_1_1	Penicillidia conspicua	M	no	2017-04-30	Sprig	Galeria din Pădure	Mine	A0116	Miniopterus schreibersii	F
A0131_1_1	Penicillidia conspicua	F	no	2017-04-30	Sprig	Galeria din Pădure	Mine	A0131	Miniopterus schreibersii	M
A0131_1_2	Penicillidia conspicua	F	no	2017-04-30	Sprig	Galeria din Pădure	Mine	A0131	Miniopterus schreibersii	M
A0136_1_1	Penicillidia conspicua	M	no	2017-04-30	Sprig	Galeria din Pădure	Mine	A0136	Miniopterus schreibersii	M
A0144_1_1	Penicillidia conspicua	F	no	2017-04-30	Sprig	Galeria din Pădure	Mine	A0144	Miniopterus schreibersii	M
A0155_1_1	Nycteribia kolenatii	F	no	2017-05-01	Sprig	Peștera Limanu	Cave	A0155	Myotis daubentonii	F
A0185_1_1	Penicillidia dufourii	F	no	2017-05-04	Sprig	Hală Nurcărie	Building	A0185	Myotis myotis	F
A0185_1_2	Penicillidia dufourii	F	no	2017-05-04	Sprig	Hală Nurcărie	Building	A0185	Myotis myotis	F
A0185_2_1	Nycteribia vexata	F	no	2017-05-04	Sprig	Hală Nurcărie	Building	A0185	Myotis myotis	F
A0186_1_1	Penicillidia dufourii	M	no	2017-05-04	Sprig	Hală Nurcărie	Building	A0186	Myotis myotis	F
A0186_1_2	Penicillidia dufourii	M	no	2017-05-04	Sprig	Hală Nurcărie	Building	A0186	Myotis myotis	F
A0186_2_1	Nycteribia vexata	M	no	2017-05-04	Sprig	Hală Nurcărie	Building	A0186	Myotis myotis	F
A0188_1_1	Penicillidia dufourii	M	no	2017-05-04	Sprig	Hală Nurcărie	Building	A0188	Rhinolophus ferrumequinum	M
A0188_2_1	Penicillidia dufourii	F	no	2017-05-04	Sprig	Hală Nurcărie	Building	A0188	Rhinolophus ferrumequinum	M
A0188_3_1	Nycteribia vexata	F	no	2017-05-04	Sprig	Hală Nurcărie	Building	A0188	Rhinolophus ferrumequinum	M
A0188_4_1	Nycteribia latreilli	F	no	2017-05-04	Sprig	Hală Nurcărie	Building	A0188	Rhinolophus ferrumequinum	M
A0190_1_1	Phthiridium biarticulatum	M	no	2017-05-04	Sprig	Hală Nurcărie	Building	A0190	Rhinolophus ferrumequinum	F
A0190_2_1	Phthiridium biarticulatum	F	no	2017-05-04	Sprig	Hală Nurcărie	Building	A0190	Rhinolophus ferrumequinum	F
A0191_1_1	Penicillidia dufourii	F	no	2017-05-04	Sprig	Hală Nurcărie	Building	A0191	Myotis myotis	F
A0193_1_1	Penicillidia dufourii	M	no	2017-05-04	Sprig	Hală Nurcărie	Building	A0193	Myotis myotis	F
A0193_2_1	Penicillidia dufourii	F	no	2017-05-04	Sprig	Hală Nurcărie	Building	A0193	Myotis myotis	F
A0199_1_1	Phthiridium biarticulatum	M	no	2017-05-07	Sprig	Galeria Magazie	Mine	A0199	Rhinolophus euryale	M
A0199_2_1	Phthiridium biarticulatum	F	no	2017-05-07	Sprig	Galeria Magazie	Mine	A0199	Rhinolophus euryale	M
A0200_1_1	Phthiridium biarticulatum	M	no	2017-05-07	Sprig	Galeria Magazie	Mine	A0200	Rhinolophus euryale	F
A0200_2_1	Phthiridium biarticulatum	F	no	2017-05-07	Sprig	Galeria Magazie	Mine	A0200	Rhinolophus euryale	F
A0202_1_1	Phthiridium biarticulatum	M	no	2017-05-07	Sprig	Galeria Magazie	Mine	A0202	Rhinolophus euryale	M
A0202_1_2	Phthiridium biarticulatum	M	no	2017-05-07	Sprig	Galeria Magazie	Mine	A0202	Rhinolophus euryale	M
A0202_1_3	Phthiridium biarticulatum	M	no	2017-05-07	Sprig	Galeria Magazie	Mine	A0202	Rhinolophus euryale	M
A0202_1_4	Phthiridium biarticulatum	M	no	2017-05-07	Sprig	Galeria Magazie	Mine	A0202	Rhinolophus euryale	M
A0202_1_5	Phthiridium biarticulatum	M	no	2017-05-07	Sprig	Galeria Magazie	Mine	A0202	Rhinolophus euryale	M
A0202_1_6	Phthiridium biarticulatum	M	no	2017-05-07	Sprig	Galeria Magazie	Mine	A0202	Rhinolophus euryale	M
A0202_2_1	Phthiridium biarticulatum	F	no	2017-05-07	Sprig	Galeria Magazie	Mine	A0202	Rhinolophus euryale	M
A0202_2_2	Phthiridium biarticulatum	F	no	2017-05-07	Sprig	Galeria Magazie	Mine	A0202	Rhinolophus euryale	M
A0202_2_3	Phthiridium biarticulatum	F	no	2017-05-07	Sprig	Galeria Magazie	Mine	A0202	Rhinolophus euryale	M
A0202_2_4	Phthiridium biarticulatum	F	no	2017-05-07	Sprig	Galeria Magazie	Mine	A0202	Rhinolophus euryale	M
A0204_1_1	Phthiridium biarticulatum	M	no	2017-05-07	Sprig	Galeria Magazie	Mine	A0204	Rhinolophus ferrumequinum	M
A0208_1_1	Phthiridium biarticulatum	F	no	2017-05-07	Sprig	Galeria Magazie	Mine	A0208	Rhinolophus ferrumequinum	F
A0208_1_2	Phthiridium biarticulatum	F	no	2017-05-07	Sprig	Galeria Magazie	Mine	A0208	Rhinolophus ferrumequinum	F
A0210_1_1	Penicillidia conspicua	M	no	2017-05-07	Sprig	Galeria Magazie	Mine	A0210	Rhinolophus euryale	M
A0210_2_1	Phthiridium biarticulatum	F	no	2017-05-07	Sprig	Galeria Magazie	Mine	A0210	Rhinolophus euryale	M
A0212_1_1	Phthiridium biarticulatum	M	no	2017-05-08	Sprig	Peștera Gaura cu Muscă	Cave	A0212	Rhinolophus euryale	M
A0212_1_2	Phthiridium biarticulatum	M	no	2017-05-08	Sprig	Peștera Gaura cu Muscă	Cave	A0212	Rhinolophus euryale	M
A0213_1_1	Phthiridium biarticulatum	M	no	2017-05-08	Sprig	Peștera Gaura cu Muscă	Cave	A0213	Rhinolophus euryale	M
A0215_1_1	Phthiridium biarticulatum	F	no	2017-05-08	Sprig	Peștera Gaura cu Muscă	Cave	A0215	Rhinolophus euryale	F
A0217_1_1	Phthiridium biarticulatum	M	no	2017-05-08	Sprig	Peștera Gaura cu Muscă	Cave	A0217	Rhinolophus euryale	F
A0217_2_1	Phthiridium biarticulatum	F	no	2017-05-08	Sprig	Peștera Gaura cu Muscă	Cave	A0217	Rhinolophus euryale	F
A0217_2_2	Phthiridium biarticulatum	F	no	2017-05-08	Sprig	Peștera Gaura cu Muscă	Cave	A0217	Rhinolophus euryale	F
A0217_2_3	Phthiridium biarticulatum	F	no	2017-05-08	Sprig	Peștera Gaura cu Muscă	Cave	A0217	Rhinolophus euryale	F
A0217_2_4	Phthiridium biarticulatum	F	no	2017-05-08	Sprig	Peștera Gaura cu Muscă	Cave	A0217	Rhinolophus euryale	F
A0217_2_5	Phthiridium biarticulatum	F	no	2017-05-08	Sprig	Peștera Gaura cu Muscă	Cave	A0217	Rhinolophus euryale	F
A0218_1_1	Phthiridium biarticulatum	F	no	2017-05-08	Sprig	Peștera Gaura cu Muscă	Cave	A0218	Rhinolophus euryale	F
A0219_1_1	Nycteribia schmidlii	F	no	2017-05-08	Sprig	Peștera Gaura cu Muscă	Cave	A0219	Miniopterus schreibersii	M
A0226_1_1	Phthiridium biarticulatum	F	no	2017-05-08	Sprig	Peștera Gaura cu Muscă	Cave	A0226	Rhinolophus euryale	F
A0229_1_1	Phthiridium biarticulatum	M	no	2017-05-08	Sprig	Peștera Gaura cu Muscă	Cave	A0229	Rhinolophus euryale	M
A0229_1_2	Phthiridium biarticulatum	M	no	2017-05-08	Sprig	Peștera Gaura cu Muscă	Cave	A0229	Rhinolophus euryale	M
A0232_1_1	Phthiridium biarticulatum	M	no	2017-05-08	Sprig	Peștera Gaura cu Muscă	Cave	A0232	Rhinolophus euryale	M
A0232_2_1	Phthiridium biarticulatum	F	no	2017-05-08	Sprig	Peștera Gaura cu Muscă	Cave	A0232	Rhinolophus euryale	M
A0233_1_1	Penicillidia dufourii	M	no	2017-05-08	Sprig	Peștera Gaura cu Muscă	Cave	A0233	Miniopterus schreibersii	F
A0233_2_1	Penicillidia dufourii	F	no	2017-05-08	Sprig	Peștera Gaura cu Muscă	Cave	A0233	Miniopterus schreibersii	F
A0234_1_1	Penicillidia conspicua	F	no	2017-05-08	Sprig	Peștera Gaura cu Muscă	Cave	A0234	Miniopterus schreibersii	F
A0234_1_2	Penicillidia conspicua	F	no	2017-05-08	Sprig	Peștera Gaura cu Muscă	Cave	A0234	Miniopterus schreibersii	F
A0234_1_3	Penicillidia conspicua	F	no	2017-05-08	Sprig	Peștera Gaura cu Muscă	Cave	A0234	Miniopterus schreibersii	F
A0237_1_1	Penicillidia dufourii	F	no	2017-05-08	Sprig	Peștera Gaura cu Muscă	Cave	A0237	Miniopterus schreibersii	F
A0238_1_1	Nycteribia pedicularia	F	no	2017-05-08	Sprig	Peștera Gaura cu Muscă	Cave	A0238	Miniopterus schreibersii	F
A0240_1_1	Nycteribia schmidlii	F	no	2017-05-08	Sprig	Peștera Gaura cu Muscă	Cave	A0240	Miniopterus schreibersii	F
A0246_1_1	Penicillidia conspicua	F	yes	2017-05-08	Sprig	Peștera Gaura cu Muscă	Cave	A0246	Miniopterus schreibersii	F
A0248_1_1	Penicillidia conspicua	F	no	2017-05-08	Sprig	Peștera Gaura cu Muscă	Cave	A0248	Miniopterus schreibersii	F
A0250_1_1	Phthiridium biarticulatum	F	no	2017-05-08	Sprig	Peștera Gaura cu Muscă	Cave	A0250	Rhinolophus euryale	M
A0251_1_1	Penicillidia conspicua	M	no	2017-05-08	Sprig	Peștera Gaura cu Muscă	Cave	A0251	Miniopterus schreibersii	F
A0251_2_1	Penicillidia conspicua	F	no	2017-05-08	Sprig	Peștera Gaura cu Muscă	Cave	A0251	Miniopterus schreibersii	F
A0252_1_1	Nycteribia schmidlii	F	no	2017-05-08	Sprig	Peștera Gaura cu Muscă	Cave	A0252	Miniopterus schreibersii	F
A0253_1_1	Nycteribia schmidlii	M	no	2017-05-08	Sprig	Peștera Gaura cu Muscă	Cave	A0253	Miniopterus schreibersii	F
A0254_1_1	Phthiridium biarticulatum	M	no	2017-05-08	Sprig	Peștera Gaura cu Muscă	Cave	A0254	Rhinolophus euryale	F
A0258_1_1	Penicillidia dufourii	F	no	2017-05-08	Sprig	Peștera Gaura cu Muscă	Cave	A0258	Myotis myotis	F
A0260_1_1	Penicillidia dufourii	M	no	2017-05-08	Sprig	Peștera Gaura cu Muscă	Cave	A0260	Myotis blythii	F
A0261_1_1	Penicillidia dufourii	F	no	2017-05-08	Sprig	Peștera Gaura cu Muscă	Cave	A0261	Myotis blythii	F
A0262_1_1	Penicillidia dufourii	F	no	2017-05-08	Sprig	Peștera Gaura cu Muscă	Cave	A0262	Myotis myotis	F
A0304_1_1	Phthiridium biarticulatum	F	no	2017-05-09	Sprig	Peștera Despicătura	Cave	A0304	Rhinolophus hipposideros	M
A0386_1_1	Penicillidia conspicua	M	no	2017-05-19	Sprig	Peștera Liliecilor	Cave	A0386	Miniopterus schreibersii	M
A0389_1_1	Penicillidia conspicua	F	no	2017-05-19	Sprig	Peștera Liliecilor	Cave	A0389	Miniopterus schreibersii	M
A0392_1_1	Penicillidia dufourii	M	no	2017-05-19	Sprig	Peștera Liliecilor	Cave	A0392	Miniopterus schreibersii	F
A0392_2_1	Penicillidia dufourii	F	no	2017-05-19	Sprig	Peștera Liliecilor	Cave	A0392	Miniopterus schreibersii	F
A0394_1_1	Penicillidia conspicua	M	no	2017-05-19	Sprig	Peștera Liliecilor	Cave	A0394	Miniopterus schreibersii	F
A0394_2_1	Penicillidia conspicua	F	no	2017-05-19	Sprig	Peștera Liliecilor	Cave	A0394	Miniopterus schreibersii	F
A0403_1_1	Penicillidia dufourii	M	no	2017-05-19	Sprig	Peștera Liliecilor	Cave	A0403	Miniopterus schreibersii	F
A0403_2_1	Nycteribia schmidlii	F	no	2017-05-19	Sprig	Peștera Liliecilor	Cave	A0403	Miniopterus schreibersii	F
A0404_1_1	Penicillidia dufourii	M	no	2017-05-19	Sprig	Peștera Liliecilor	Cave	A0404	Miniopterus schreibersii	F
A0404_2_1	Penicillidia dufourii	F	no	2017-05-19	Sprig	Peștera Liliecilor	Cave	A0404	Miniopterus schreibersii	F
A0406_1_1	Nycteribia schmidlii	F	no	2017-05-19	Sprig	Peștera Liliecilor	Cave	A0406	Miniopterus schreibersii	F
A0408_1_1	Penicillidia conspicua	F	no	2017-05-19	Sprig	Peștera Liliecilor	Cave	A0408	Miniopterus schreibersii	M
A0408_2_1	Nycteribia schmidlii	F	no	2017-05-19	Sprig	Peștera Liliecilor	Cave	A0408	Miniopterus schreibersii	M
A0409_1_1	Penicillidia dufourii	M	no	2017-05-19	Sprig	Peștera Liliecilor	Cave	A0409	Miniopterus schreibersii	F
A0411_1_1	Penicillidia conspicua	F	no	2017-05-19	Sprig	Peștera Liliecilor	Cave	A0411	Miniopterus schreibersii	F
A0411_2_1	Nycteribia schmidlii	F	no	2017-05-19	Sprig	Peștera Liliecilor	Cave	A0411	Miniopterus schreibersii	F
A0412_1_1	Penicillidia conspicua	F	no	2017-05-19	Sprig	Peștera Liliecilor	Cave	A0412	Miniopterus schreibersii	M
A0413_1_1	Penicillidia dufourii	M	no	2017-05-19	Sprig	Peștera Liliecilor	Cave	A0413	Miniopterus schreibersii	F
A0415_1_1	Penicillidia conspicua	F	no	2017-05-19	Sprig	Peștera Liliecilor	Cave	A0415	Miniopterus schreibersii	F
A0417_1_1	Nycteribia schmidlii	M	no	2017-05-19	Sprig	Peștera Liliecilor	Cave	A0417	Miniopterus schreibersii	F
A0418_1_1	Nycteribia schmidlii	M	no	2017-05-19	Sprig	Peștera Liliecilor	Cave	A0418	Miniopterus schreibersii	M
A0422_1_1	Nycteribia schmidlii	F	no	2017-05-19	Sprig	Peștera Liliecilor	Cave	A0422	Miniopterus schreibersii	F
A0427_1_1	Penicillidia conspicua	F	no	2017-05-19	Sprig	Peștera Liliecilor	Cave	A0427	Miniopterus schreibersii	F
A0429_1_1	Nycteribia schmidlii	F	no	2017-05-19	Sprig	Peștera Liliecilor	Cave	A0429	Miniopterus schreibersii	F
A0429_1_2	Nycteribia schmidlii	F	no	2017-05-19	Sprig	Peștera Liliecilor	Cave	A0429	Miniopterus schreibersii	F
A0443_1_1	Penicillidia conspicua	F	no	2017-05-19	Sprig	Peștera Liliecilor	Cave	A0443	Miniopterus schreibersii	M
A0444_1_1	Nycteribia vexata	M	no	2017-05-19	Sprig	Peștera Liliecilor	Cave	A0444	Myotis blythii	F
A0444_2_1	Nycteribia vexata	F	no	2017-05-19	Sprig	Peștera Liliecilor	Cave	A0444	Myotis blythii	F
A0444_3_1	Nycteribia latreilli	F	no	2017-05-19	Sprig	Peștera Liliecilor	Cave	A0444	Myotis blythii	F
A0448_1_1	Penicillidia dufourii	F	no	2017-05-19	Sprig	Peștera Liliecilor	Cave	A0448	Myotis blythii	F
A0452_1_1	Penicillidia dufourii	M	no	2017-05-20	Sprig	Peștera Tunel	Mine	A0452	Miniopterus schreibersii	M
A0452_2_1	Penicillidia dufourii	F	no	2017-05-20	Sprig	Peștera Tunel	Mine	A0452	Miniopterus schreibersii	M
A0458_1_1	Penicillidia dufourii	M	no	2017-05-20	Sprig	Peștera Tunel	Mine	A0458	Myotis daubentonii	M
A0458_2_1	Penicillidia dufourii	F	no	2017-05-20	Sprig	Peștera Tunel	Mine	A0458	Myotis daubentonii	M
A0458_3_1	Nycteribia kolenatii	M	no	2017-05-20	Sprig	Peștera Tunel	Mine	A0458	Myotis daubentonii	M
A0458_4_1	Nycteribia kolenatii	F	no	2017-05-20	Sprig	Peștera Tunel	Mine	A0458	Myotis daubentonii	M
A0547_1_1	Penicillidia dufourii	M	no	2017-05-22	Sprig	Galeria din Pădure	Mine	A0547	Miniopterus schreibersii	F
A0550_1_1	Penicillidia dufourii	F	no	2017-05-22	Sprig	Galeria din Pădure	Mine	A0550	Myotis myotis	F
A0552_1_1	Nycteribia vexata	M	no	2017-05-22	Sprig	Galeria din Pădure	Mine	A0552	Myotis blythii	F
A0554_1_1	Penicillidia dufourii	F	no	2017-05-22	Sprig	Galeria din Pădure	Mine	A0554	Myotis blythii	F
A0554_1_2	Penicillidia dufourii	F	no	2017-05-22	Sprig	Galeria din Pădure	Mine	A0554	Myotis blythii	F
A0555_1_1	Penicillidia dufourii	M	no	2017-05-22	Sprig	Galeria din Pădure	Mine	A0555	Myotis blythii	F
A0555_2_1	Penicillidia dufourii	F	no	2017-05-22	Sprig	Galeria din Pădure	Mine	A0555	Myotis blythii	F
A0555_3_1	Nycteribia latreilli	F	no	2017-05-22	Sprig	Galeria din Pădure	Mine	A0555	Myotis blythii	F
A0556_1_1	Penicillidia dufourii	F	no	2017-05-22	Sprig	Galeria din Pădure	Mine	A0556	Myotis blythii	F
A0557_1_1	Nycteribia latreilli	F	no	2017-05-22	Sprig	Galeria din Pădure	Mine	A0557	Myotis blythii	F
A0559_1_1	Penicillidia conspicua	F	yes	2017-05-22	Sprig	Galeria din Pădure	Mine	A0559	Miniopterus schreibersii	M
A0560_1_1	Phthiridium biarticulatum	F	no	2017-05-22	Sprig	Galeria din Pădure	Mine	A0560	Rhinolophus mehelyi	M
A0562_1_1	Phthiridium biarticulatum	M	no	2017-05-22	Sprig	Galeria din Pădure	Mine	A0562	Rhinolophus mehelyi	M
A0564_1_1	Penicillidia dufourii	F	no	2017-05-22	Sprig	Galeria din Pădure	Mine	A0564	Myotis daubentonii	F
A0564_1_2	Penicillidia dufourii	F	no	2017-05-22	Sprig	Galeria din Pădure	Mine	A0564	Myotis daubentonii	F
A0565_1_1	Nycteribia vexata	M	no	2017-05-22	Sprig	Galeria din Pădure	Mine	A0565	Myotis myotis	F
A0569_1_1	Nycteribia kolenatii	M	no	2017-05-22	Sprig	Galeria din Carieră	Mine	A0569	Myotis daubentonii	F
A0570_1_1	Phthiridium biarticulatum	M	no	2017-05-22	Sprig	Galeria din Pădure	Mine	A0570	Rhinolophus mehelyi	F
A0573_1_1	Penicillidia dufourii	M	no	2017-05-22	Sprig	Galeria din Pădure	Mine	A0573	Myotis myotis	F
A0573_2_1	Penicillidia dufourii	F	no	2017-05-22	Sprig	Galeria din Pădure	Mine	A0573	Myotis myotis	F
A0573_2_2	Penicillidia dufourii	F	no	2017-05-22	Sprig	Galeria din Pădure	Mine	A0573	Myotis myotis	F
A0574_1_1	Phthiridium biarticulatum	M	no	2017-05-22	Sprig	Galeria din Pădure	Mine	A0574	Rhinolophus mehelyi	M
A0574_1_2	Phthiridium biarticulatum	M	no	2017-05-22	Sprig	Galeria din Pădure	Mine	A0574	Rhinolophus mehelyi	M
A0574_2_1	Phthiridium biarticulatum	F	no	2017-05-22	Sprig	Galeria din Pădure	Mine	A0574	Rhinolophus mehelyi	M
A0575_1_1	Penicillidia dufourii	M	no	2017-05-22	Sprig	Galeria din Pădure	Mine	A0575	Myotis myotis	F
A0575_2_1	Penicillidia dufourii	F	no	2017-05-22	Sprig	Galeria din Pădure	Mine	A0575	Myotis myotis	F
A0595_1_1	Phthiridium biarticulatum	F	no	2017-08-14	Fall	Hală Nurcărie	Building	A0595	Rhinolophus ferrumequinum	M
A0607_1_1	Phthiridium biarticulatum	M	no	2017-08-14	Fall	Hală Nurcărie	Building	A0607	Rhinolophus ferrumequinum	F
A0613_1_1	Penicillidia dufourii	M	no	2017-08-14	Fall	Hală Nurcărie	Building	A0613	Myotis blythii	F
A0617_1_1	Penicillidia dufourii	M	yes	2017-08-14	Fall	Hală Nurcărie	Building	A0617	Myotis myotis	F
A0617_1_2	Penicillidia dufourii	M	no	2017-08-14	Fall	Hală Nurcărie	Building	A0617	Myotis myotis	F
A0617_1_3	Penicillidia dufourii	M	no	2017-08-14	Fall	Hală Nurcărie	Building	A0617	Myotis myotis	F
A0617_2_1	Penicillidia dufourii	F	no	2017-08-14	Fall	Hală Nurcărie	Building	A0617	Myotis myotis	F
A0617_2_2	Penicillidia dufourii	F	no	2017-08-14	Fall	Hală Nurcărie	Building	A0617	Myotis myotis	F
A0617_3_1	Nycteribia vexata	F	no	2017-08-14	Fall	Hală Nurcărie	Building	A0617	Myotis myotis	F
A0618_1_1	Phthiridium biarticulatum	F	no	2017-08-14	Fall	Hală Nurcărie	Building	A0618	Rhinolophus ferrumequinum	M
A0621_1_1	Penicillidia dufourii	F	no	2017-08-14	Fall	Hală Nurcărie	Building	A0621	Myotis blythii	M
A0630_1_1	Nycteribia schmidlii	M	no	2017-08-14	Fall	Hală Nurcărie	Building	A0630	Miniopterus schreibersii	F
A0630_2_1	Nycteribia schmidlii	F	no	2017-08-14	Fall	Hală Nurcărie	Building	A0630	Miniopterus schreibersii	F
A0630_2_2	Nycteribia schmidlii	F	no	2017-08-14	Fall	Hală Nurcărie	Building	A0630	Miniopterus schreibersii	F
A0640_1_1	Phthiridium biarticulatum	F	no	2017-08-14	Fall	Hală Nurcărie	Building	A0640	Rhinolophus ferrumequinum	F
A0642_1_1	Phthiridium biarticulatum	M	no	2017-08-14	Fall	Hală Nurcărie	Building	A0642	Rhinolophus ferrumequinum	F
A0642_1_2	Phthiridium biarticulatum	M	no	2017-08-14	Fall	Hală Nurcărie	Building	A0642	Rhinolophus ferrumequinum	F
A0642_2_1	Phthiridium biarticulatum	F	no	2017-08-14	Fall	Hală Nurcărie	Building	A0642	Rhinolophus ferrumequinum	F
A0642_2_2	Phthiridium biarticulatum	F	no	2017-08-14	Fall	Hală Nurcărie	Building	A0642	Rhinolophus ferrumequinum	F
A0668_1_1	Nycteribia vexata	F	no	2017-08-29	Fall	Pestera de la Intorsuri	Cave	A0668	Myotis myotis	M
A0669_1_1	Basilia nana	F	no	2017-08-29	Fall	Pestera de la Intorsuri	Cave	A0669	Myotis bechsteinii	M
A0675_1_1	Phthiridium biarticulatum	M	yes	2017-09-04	Fall	Galeria Magazie	Mine	A0675	Rhinolophus euryale	F
A0681_1_1	Phthiridium biarticulatum	F	no	2017-09-04	Fall	Galeria Magazie	Mine	A0681	Rhinolophus euryale	M
A0683_1_1	Nycteribia schmidlii	M	no	2017-09-04	Fall	Galeria Magazie	Mine	A0683	Miniopterus schreibersii	F
A0683_2_1	Nycteribia schmidlii	F	no	2017-09-04	Fall	Galeria Magazie	Mine	A0683	Miniopterus schreibersii	F
A0683_2_2	Nycteribia schmidlii	F	no	2017-09-04	Fall	Galeria Magazie	Mine	A0683	Miniopterus schreibersii	F
A0685_1_1	Phthiridium biarticulatum	M	no	2017-09-04	Fall	Galeria Magazie	Mine	A0685	Rhinolophus euryale	F
A0689_1_1	Phthiridium biarticulatum	M	no	2017-09-04	Fall	Galeria Magazie	Mine	A0689	Rhinolophus euryale	M
A0690_1_1	Phthiridium biarticulatum	M	yes	2017-09-04	Fall	Galeria Magazie	Mine	A0690	Rhinolophus euryale	F
A0696_1_1	Nycteribia schmidlii	F	no	2017-09-04	Fall	Galeria Magazie	Mine	A0696	Miniopterus schreibersii	M
A0696_1_2	Nycteribia schmidlii	F	no	2017-09-04	Fall	Galeria Magazie	Mine	A0696	Miniopterus schreibersii	M
A0697_1_1	Phthiridium biarticulatum	M	no	2017-09-04	Fall	Galeria Magazie	Mine	A0697	Rhinolophus euryale	M
A0698_1_1	Phthiridium biarticulatum	M	no	2017-09-04	Fall	Galeria Magazie	Mine	A0698	Rhinolophus euryale	M
A0699_1_1	Phthiridium biarticulatum	M	no	2017-09-04	Fall	Galeria Magazie	Mine	A0699	Rhinolophus euryale	M
A0699_2_1	Phthiridium biarticulatum	F	yes	2017-09-04	Fall	Galeria Magazie	Mine	A0699	Rhinolophus euryale	M
A0699_2_2	Phthiridium biarticulatum	F	no	2017-09-04	Fall	Galeria Magazie	Mine	A0699	Rhinolophus euryale	M
A0699_2_3	Phthiridium biarticulatum	F	no	2017-09-04	Fall	Galeria Magazie	Mine	A0699	Rhinolophus euryale	M
A0699_2_4	Phthiridium biarticulatum	F	no	2017-09-04	Fall	Galeria Magazie	Mine	A0699	Rhinolophus euryale	M
A0699_2_5	Phthiridium biarticulatum	F	no	2017-09-04	Fall	Galeria Magazie	Mine	A0699	Rhinolophus euryale	M
A0699_2_6	Phthiridium biarticulatum	F	no	2017-09-04	Fall	Galeria Magazie	Mine	A0699	Rhinolophus euryale	M
A0700_1_1	Phthiridium biarticulatum	M	no	2017-09-04	Fall	Galeria Magazie	Mine	A0700	Rhinolophus euryale	M
A0700_1_2	Phthiridium biarticulatum	M	no	2017-09-04	Fall	Galeria Magazie	Mine	A0700	Rhinolophus euryale	M
A0700_2_1	Phthiridium biarticulatum	F	yes	2017-09-04	Fall	Galeria Magazie	Mine	A0700	Rhinolophus euryale	M
A0700_2_2	Phthiridium biarticulatum	F	no	2017-09-04	Fall	Galeria Magazie	Mine	A0700	Rhinolophus euryale	M
A0700_2_3	Phthiridium biarticulatum	F	no	2017-09-04	Fall	Galeria Magazie	Mine	A0700	Rhinolophus euryale	M
A0700_2_4	Phthiridium biarticulatum	F	no	2017-09-04	Fall	Galeria Magazie	Mine	A0700	Rhinolophus euryale	M
A0702_1_1	Nycteribia schmidlii	F	no	2017-09-04	Fall	Galeria Magazie	Mine	A0702	Rhinolophus euryale	F
A0703_1_1	Penicillidia conspicua	F	yes	2017-09-04	Fall	Galeria Magazie	Mine	A0703	Miniopterus schreibersii	M
A0706_1_1	Phthiridium biarticulatum	M	no	2017-09-04	Fall	Galeria Magazie	Mine	A0706	Rhinolophus euryale	F
A0709_1_1	Penicillidia conspicua	M	yes	2017-09-04	Fall	Galeria Magazie	Mine	A0709	Miniopterus schreibersii	F
A0711_1_1	Nycteribia schmidlii	M	no	2017-09-04	Fall	Galeria Magazie	Mine	A0711	Miniopterus schreibersii	M
A0711_2_1	Penicillidia conspicua	F	yes	2017-09-04	Fall	Galeria Magazie	Mine	A0711	Miniopterus schreibersii	M
A0713_1_1	Nycteribia schmidlii	M	no	2017-09-04	Fall	Galeria Magazie	Mine	A0713	Miniopterus schreibersii	F
A0713_1_2	Nycteribia schmidlii	M	no	2017-09-04	Fall	Galeria Magazie	Mine	A0713	Miniopterus schreibersii	F
A0713_1_3	Nycteribia schmidlii	M	no	2017-09-04	Fall	Galeria Magazie	Mine	A0713	Miniopterus schreibersii	F
A0713_2_1	Nycteribia schmidlii	F	no	2017-09-04	Fall	Galeria Magazie	Mine	A0713	Miniopterus schreibersii	F
A0713_2_2	Nycteribia schmidlii	F	no	2017-09-04	Fall	Galeria Magazie	Mine	A0713	Miniopterus schreibersii	F
A0713_2_3	Nycteribia schmidlii	F	no	2017-09-04	Fall	Galeria Magazie	Mine	A0713	Miniopterus schreibersii	F
A0714_1_1	Penicillidia conspicua	F	no	2017-09-04	Fall	Galeria Magazie	Mine	A0714	Miniopterus schreibersii	M
A0720_1_1	Nycteribia schmidlii	F	no	2017-09-04	Fall	Galeria Magazie	Mine	A0720	Miniopterus schreibersii	M
A0721_1_1	Nycteribia schmidlii	F	no	2017-09-04	Fall	Galeria Magazie	Mine	A0721	Miniopterus schreibersii	F
A0722_1_1	Penicillidia conspicua	M	no	2017-09-04	Fall	Galeria Magazie	Mine	A0722	Miniopterus schreibersii	F
A0722_2_1	Nycteribia schmidlii	M	no	2017-09-04	Fall	Galeria Magazie	Mine	A0722	Miniopterus schreibersii	F
A0722_2_2	Nycteribia schmidlii	M	no	2017-09-04	Fall	Galeria Magazie	Mine	A0722	Miniopterus schreibersii	F
A0723_1_1	Phthiridium biarticulatum	F	no	2017-09-04	Fall	Galeria Magazie	Mine	A0723	Rhinolophus euryale	M
A0724_1_1	Nycteribia schmidlii	M	no	2017-09-04	Fall	Galeria Magazie	Mine	A0724	Miniopterus schreibersii	F
A0724_2_1	Nycteribia schmidlii	F	no	2017-09-04	Fall	Galeria Magazie	Mine	A0724	Miniopterus schreibersii	F
A0725_1_1	Nycteribia schmidlii	M	no	2017-09-04	Fall	Galeria Magazie	Mine	A0725	Miniopterus schreibersii	F
A0725_2_1	Penicillidia conspicua	F	no	2017-09-04	Fall	Galeria Magazie	Mine	A0725	Miniopterus schreibersii	F
A0725_3_1	Nycteribia schmidlii	F	no	2017-09-04	Fall	Galeria Magazie	Mine	A0725	Miniopterus schreibersii	F
A0725_3_2	Nycteribia schmidlii	F	no	2017-09-04	Fall	Galeria Magazie	Mine	A0725	Miniopterus schreibersii	F
A0726_1_1	Penicillidia conspicua	F	no	2017-09-04	Fall	Galeria Magazie	Mine	A0726	Miniopterus schreibersii	M
A0728_1_1	Nycteribia schmidlii	M	no	2017-09-04	Fall	Galeria Magazie	Mine	A0728	Miniopterus schreibersii	F
A0728_2_1	Nycteribia schmidlii	F	no	2017-09-04	Fall	Galeria Magazie	Mine	A0728	Miniopterus schreibersii	F
A0728_2_2	Nycteribia schmidlii	F	no	2017-09-04	Fall	Galeria Magazie	Mine	A0728	Miniopterus schreibersii	F
A0731_1_1	Nycteribia schmidlii	F	no	2017-09-04	Fall	Galeria Magazie	Mine	A0731	Miniopterus schreibersii	M
A0731_1_2	Nycteribia schmidlii	F	no	2017-09-04	Fall	Galeria Magazie	Mine	A0731	Miniopterus schreibersii	M
A0732_1_1	Nycteribia schmidlii	M	no	2017-09-04	Fall	Galeria Magazie	Mine	A0732	Miniopterus schreibersii	M
A0732_1_2	Nycteribia schmidlii	M	no	2017-09-04	Fall	Galeria Magazie	Mine	A0732	Miniopterus schreibersii	M
A0732_2_1	Penicillidia conspicua	F	yes	2017-09-04	Fall	Galeria Magazie	Mine	A0732	Miniopterus schreibersii	M
A0732_3_1	Nycteribia schmidlii	F	no	2017-09-04	Fall	Galeria Magazie	Mine	A0732	Miniopterus schreibersii	M
A0732_3_2	Nycteribia schmidlii	F	no	2017-09-04	Fall	Galeria Magazie	Mine	A0732	Miniopterus schreibersii	M
A0734_1_1	Penicillidia conspicua	M	yes	2017-09-04	Fall	Galeria Magazie	Mine	A0734	Miniopterus schreibersii	M
A0736_1_1	Nycteribia schmidlii	M	no	2017-09-04	Fall	Galeria Magazie	Mine	A0736	Rhinolophus ferrumequinum	M
A0736_2_1	Nycteribia schmidlii	F	no	2017-09-04	Fall	Galeria Magazie	Mine	A0736	Rhinolophus ferrumequinum	M
A0737_1_1	Penicillidia dufourii	F	yes	2017-09-04	Fall	Galeria Magazie	Mine	A0737	Miniopterus schreibersii	M
A0739_1_1	Nycteribia schmidlii	F	no	2017-09-04	Fall	Galeria Magazie	Mine	A0739	Miniopterus schreibersii	F
A0740_1_1	Nycteribia schmidlii	M	no	2017-09-04	Fall	Galeria Magazie	Mine	A0740	Miniopterus schreibersii	M
A0744_1_1	Penicillidia conspicua	F	no	2017-09-04	Fall	Galeria Magazie	Mine	A0744	Miniopterus schreibersii	F
A0745_1_1	Penicillidia conspicua	F	no	2017-09-04	Fall	Galeria Magazie	Mine	A0745	Miniopterus schreibersii	F
A0751_1_1	Penicillidia conspicua	M	no	2017-09-05	Fall	Peștera Gaura Ungurului Pecinișca	Cave	A0751	Miniopterus schreibersii	F
A0751_2_1	Penicillidia dufourii	F	no	2017-09-05	Fall	Peștera Gaura Ungurului Pecinișca	Cave	A0751	Miniopterus schreibersii	F
A0752_1_1	Phthiridium biarticulatum	M	no	2017-09-05	Fall	Peștera Gaura Ungurului Pecinișca	Cave	A0752	Rhinolophus euryale	M
A0752_2_1	Phthiridium biarticulatum	F	no	2017-09-05	Fall	Peștera Gaura Ungurului Pecinișca	Cave	A0752	Rhinolophus euryale	M
A0753_1_1	Phthiridium biarticulatum	M	no	2017-09-05	Fall	Peștera Gaura Ungurului Pecinișca	Cave	A0753	Rhinolophus blasii	M
A0753_2_1	Phthiridium biarticulatum	F	no	2017-09-05	Fall	Peștera Gaura Ungurului Pecinișca	Cave	A0753	Rhinolophus blasii	M
A0753_2_2	Phthiridium biarticulatum	F	no	2017-09-05	Fall	Peștera Gaura Ungurului Pecinișca	Cave	A0753	Rhinolophus blasii	M
A0753_2_3	Phthiridium biarticulatum	F	no	2017-09-05	Fall	Peștera Gaura Ungurului Pecinișca	Cave	A0753	Rhinolophus blasii	M
A0753_2_4	Phthiridium biarticulatum	F	no	2017-09-05	Fall	Peștera Gaura Ungurului Pecinișca	Cave	A0753	Rhinolophus blasii	M
A0757_1_1	Phthiridium biarticulatum	M	no	2017-09-05	Fall	Peștera Gaura Ungurului Pecinișca	Cave	A0757	Rhinolophus euryale	F
A0757_1_2	Phthiridium biarticulatum	M	no	2017-09-05	Fall	Peștera Gaura Ungurului Pecinișca	Cave	A0757	Rhinolophus euryale	F
A0757_1_3	Phthiridium biarticulatum	M	no	2017-09-05	Fall	Peștera Gaura Ungurului Pecinișca	Cave	A0757	Rhinolophus euryale	F
A0757_1_4	Phthiridium biarticulatum	M	no	2017-09-05	Fall	Peștera Gaura Ungurului Pecinișca	Cave	A0757	Rhinolophus euryale	F
A0757_2_1	Phthiridium biarticulatum	F	yes	2017-09-05	Fall	Peștera Gaura Ungurului Pecinișca	Cave	A0757	Rhinolophus euryale	F
A0757_2_2	Phthiridium biarticulatum	F	no	2017-09-05	Fall	Peștera Gaura Ungurului Pecinișca	Cave	A0757	Rhinolophus euryale	F
A0757_2_3	Phthiridium biarticulatum	F	no	2017-09-05	Fall	Peștera Gaura Ungurului Pecinișca	Cave	A0757	Rhinolophus euryale	F
A0757_2_4	Phthiridium biarticulatum	F	no	2017-09-05	Fall	Peștera Gaura Ungurului Pecinișca	Cave	A0757	Rhinolophus euryale	F
A0757_2_5	Phthiridium biarticulatum	F	no	2017-09-05	Fall	Peștera Gaura Ungurului Pecinișca	Cave	A0757	Rhinolophus euryale	F
A0757_2_6	Phthiridium biarticulatum	F	no	2017-09-05	Fall	Peștera Gaura Ungurului Pecinișca	Cave	A0757	Rhinolophus euryale	F
A0758_1_1	Phthiridium biarticulatum	M	no	2017-09-05	Fall	Peștera Gaura Ungurului Pecinișca	Cave	A0758	Rhinolophus blasii	F
A0758_1_2	Phthiridium biarticulatum	M	no	2017-09-05	Fall	Peștera Gaura Ungurului Pecinișca	Cave	A0758	Rhinolophus blasii	F
A0758_2_1	Phthiridium biarticulatum	F	no	2017-09-05	Fall	Peștera Gaura Ungurului Pecinișca	Cave	A0758	Rhinolophus blasii	F
A0759_1_1	Phthiridium biarticulatum	M	no	2017-09-05	Fall	Peștera Gaura Ungurului Pecinișca	Cave	A0759	Rhinolophus euryale	F
A0759_1_2	Phthiridium biarticulatum	M	no	2017-09-05	Fall	Peștera Gaura Ungurului Pecinișca	Cave	A0759	Rhinolophus euryale	F
A0759_1_3	Phthiridium biarticulatum	M	no	2017-09-05	Fall	Peștera Gaura Ungurului Pecinișca	Cave	A0759	Rhinolophus euryale	F
A0759_2_1	Phthiridium biarticulatum	F	yes	2017-09-05	Fall	Peștera Gaura Ungurului Pecinișca	Cave	A0759	Rhinolophus euryale	F
A0759_2_2	Phthiridium biarticulatum	F	no	2017-09-05	Fall	Peștera Gaura Ungurului Pecinișca	Cave	A0759	Rhinolophus euryale	F
A0759_2_3	Phthiridium biarticulatum	F	no	2017-09-05	Fall	Peștera Gaura Ungurului Pecinișca	Cave	A0759	Rhinolophus euryale	F
A0759_2_4	Phthiridium biarticulatum	F	no	2017-09-05	Fall	Peștera Gaura Ungurului Pecinișca	Cave	A0759	Rhinolophus euryale	F
A0759_2_5	Phthiridium biarticulatum	F	no	2017-09-05	Fall	Peștera Gaura Ungurului Pecinișca	Cave	A0759	Rhinolophus euryale	F
A0759_2_6	Phthiridium biarticulatum	F	no	2017-09-05	Fall	Peștera Gaura Ungurului Pecinișca	Cave	A0759	Rhinolophus euryale	F
A0760_1_1	Phthiridium biarticulatum	F	no	2017-09-05	Fall	Peștera Gaura Ungurului Pecinișca	Cave	A0760	Rhinolophus blasii	F
A0760_1_2	Phthiridium biarticulatum	F	no	2017-09-05	Fall	Peștera Gaura Ungurului Pecinișca	Cave	A0760	Rhinolophus blasii	F
A0760_1_3	Phthiridium biarticulatum	F	no	2017-09-05	Fall	Peștera Gaura Ungurului Pecinișca	Cave	A0760	Rhinolophus blasii	F
A0761_1_1	Phthiridium biarticulatum	M	no	2017-09-05	Fall	Peștera Gaura Ungurului Pecinișca	Cave	A0761	Rhinolophus blasii	F
A0762_1_1	Phthiridium biarticulatum	M	no	2017-09-05	Fall	Peștera Gaura Ungurului Pecinișca	Cave	A0762	Rhinolophus blasii	F
A0762_1_2	Phthiridium biarticulatum	M	no	2017-09-05	Fall	Peștera Gaura Ungurului Pecinișca	Cave	A0762	Rhinolophus blasii	F
A0762_2_1	Phthiridium biarticulatum	F	no	2017-09-05	Fall	Peștera Gaura Ungurului Pecinișca	Cave	A0762	Rhinolophus blasii	F
A0762_2_2	Phthiridium biarticulatum	F	no	2017-09-05	Fall	Peștera Gaura Ungurului Pecinișca	Cave	A0762	Rhinolophus blasii	F
A0764_1_1	Phthiridium biarticulatum	F	no	2017-09-05	Fall	Peștera Gaura Ungurului Pecinișca	Cave	A0764	Rhinolophus euryale	M
A0764_1_2	Phthiridium biarticulatum	F	no	2017-09-05	Fall	Peștera Gaura Ungurului Pecinișca	Cave	A0764	Rhinolophus euryale	M
A0766_1_1	Phthiridium biarticulatum	M	no	2017-09-05	Fall	Peștera Gaura Ungurului Pecinișca	Cave	A0766	Rhinolophus blasii	M
A0767_1_1	Phthiridium biarticulatum	M	no	2017-09-05	Fall	Peștera Gaura Ungurului Pecinișca	Cave	A0767	Rhinolophus euryale	F
A0767_1_2	Phthiridium biarticulatum	M	no	2017-09-05	Fall	Peștera Gaura Ungurului Pecinișca	Cave	A0767	Rhinolophus euryale	F
A0767_1_3	Phthiridium biarticulatum	M	no	2017-09-05	Fall	Peștera Gaura Ungurului Pecinișca	Cave	A0767	Rhinolophus euryale	F
A0767_2_1	Phthiridium biarticulatum	F	no	2017-09-05	Fall	Peștera Gaura Ungurului Pecinișca	Cave	A0767	Rhinolophus euryale	F
A0768_1_1	Phthiridium biarticulatum	M	no	2017-09-05	Fall	Peștera Gaura Ungurului Pecinișca	Cave	A0768	Rhinolophus euryale	F
A0773_1_1	Phthiridium biarticulatum	M	no	2017-09-05	Fall	Peștera Gaura Ungurului Pecinișca	Cave	A0773	Rhinolophus euryale	M
A0773_1_2	Phthiridium biarticulatum	M	no	2017-09-05	Fall	Peștera Gaura Ungurului Pecinișca	Cave	A0773	Rhinolophus euryale	M
A0773_2_1	Phthiridium biarticulatum	F	no	2017-09-05	Fall	Peștera Gaura Ungurului Pecinișca	Cave	A0773	Rhinolophus euryale	M
A0776_1_1	Penicillidia dufourii	M	no	2017-09-05	Fall	Peștera Gaura Ungurului Pecinișca	Cave	A0776	Myotis capaccinii	F
A0776_2_1	Penicillidia dufourii	F	no	2017-09-05	Fall	Peștera Gaura Ungurului Pecinișca	Cave	A0776	Myotis capaccinii	F
A0776_3_1	Nycteribia pedicularia	M	no	2017-09-05	Fall	Peștera Gaura Ungurului Pecinișca	Cave	A0776	Myotis capaccinii	F
A0776_3_2	Nycteribia pedicularia	M	no	2017-09-05	Fall	Peștera Gaura Ungurului Pecinișca	Cave	A0776	Myotis capaccinii	F
A0776_4_1	Nycteribia pedicularia	F	no	2017-09-05	Fall	Peștera Gaura Ungurului Pecinișca	Cave	A0776	Myotis capaccinii	F
A0779_1_1	Nycteribia latreilli	F	no	2017-09-05	Fall	Peștera Gaura Ungurului Pecinișca	Cave	A0779	Myotis blythii	M
A0780_1_1	Phthiridium biarticulatum	M	no	2017-09-05	Fall	Peștera Gaura Ungurului Pecinișca	Cave	A0780	Rhinolophus euryale	M
A0780_2_1	Phthiridium biarticulatum	F	no	2017-09-05	Fall	Peștera Gaura Ungurului Pecinișca	Cave	A0780	Rhinolophus euryale	M
A0782_1_1	Phthiridium biarticulatum	M	no	2017-09-05	Fall	Peștera Gaura Ungurului Pecinișca	Cave	A0782	Rhinolophus euryale	M
A0782_1_2	Phthiridium biarticulatum	M	no	2017-09-05	Fall	Peștera Gaura Ungurului Pecinișca	Cave	A0782	Rhinolophus euryale	M
A0782_2_1	Phthiridium biarticulatum	F	no	2017-09-05	Fall	Peștera Gaura Ungurului Pecinișca	Cave	A0782	Rhinolophus euryale	M
A0784_1_1	Nycteribia schmidlii	M	no	2017-09-07	Fall	Mișin Kamak	Cave	A0784	Miniopterus schreibersii	M
A0784_2_1	Penicillidia conspicua	F	no	2017-09-07	Fall	Mișin Kamak	Cave	A0784	Miniopterus schreibersii	M
A0785_1_1	Penicillidia conspicua	M	no	2017-09-07	Fall	Mișin Kamak	Cave	A0785	Miniopterus schreibersii	M
A0785_2_1	Penicillidia conspicua	F	no	2017-09-07	Fall	Mișin Kamak	Cave	A0785	Miniopterus schreibersii	M
A0788_1_1	Nycteribia pedicularia	M	no	2017-09-07	Fall	Mișin Kamak	Cave	A0788	Myotis capaccinii	F
A0788_1_2	Nycteribia pedicularia	M	no	2017-09-07	Fall	Mișin Kamak	Cave	A0788	Myotis capaccinii	F
A0792_1_1	Penicillidia conspicua	F	no	2017-09-07	Fall	Mișin Kamak	Cave	A0792	Miniopterus schreibersii	M
A0793_1_1	Penicillidia conspicua	F	no	2017-09-07	Fall	Mișin Kamak	Cave	A0793	Miniopterus schreibersii	F
A0793_2_1	Nycteribia schmidlii	F	no	2017-09-07	Fall	Mișin Kamak	Cave	A0793	Miniopterus schreibersii	F
A0793_2_2	Nycteribia schmidlii	F	no	2017-09-07	Fall	Mișin Kamak	Cave	A0793	Miniopterus schreibersii	F
A0794_1_1	Penicillidia conspicua	M	no	2017-09-07	Fall	Mișin Kamak	Cave	A0794	Miniopterus schreibersii	M
A0795_1_1	Nycteribia schmidlii	F	no	2017-09-07	Fall	Mișin Kamak	Cave	A0795	Miniopterus schreibersii	M
A0795_1_2	Nycteribia schmidlii	F	no	2017-09-07	Fall	Mișin Kamak	Cave	A0795	Miniopterus schreibersii	M
A0796_1_1	Nycteribia schmidlii	F	no	2017-09-07	Fall	Mișin Kamak	Cave	A0796	Miniopterus schreibersii	M
A0800_1_1	Penicillidia conspicua	M	no	2017-09-07	Fall	Mișin Kamak	Cave	A0800	Miniopterus schreibersii	M
A0800_2_1	Nycteribia schmidlii	M	no	2017-09-07	Fall	Mișin Kamak	Cave	A0800	Miniopterus schreibersii	M
A0804_1_1	Nycteribia schmidlii	M	no	2017-09-07	Fall	Mișin Kamak	Cave	A0804	Miniopterus schreibersii	M
A0805_1_1	Penicillidia conspicua	M	no	2017-09-07	Fall	Mișin Kamak	Cave	A0805	Miniopterus schreibersii	M
A0805_1_2	Penicillidia conspicua	M	no	2017-09-07	Fall	Mișin Kamak	Cave	A0805	Miniopterus schreibersii	M
A0806_1_1	Penicillidia conspicua	M	no	2017-09-07	Fall	Mișin Kamak	Cave	A0806	Miniopterus schreibersii	M
A0807_1_1	Nycteribia schmidlii	M	no	2017-09-07	Fall	Mișin Kamak	Cave	A0807	Miniopterus schreibersii	M
A0808_1_1	Penicillidia conspicua	M	no	2017-09-07	Fall	Mișin Kamak	Cave	A0808	Miniopterus schreibersii	M
A0808_2_1	Nycteribia schmidlii	M	no	2017-09-07	Fall	Mișin Kamak	Cave	A0808	Miniopterus schreibersii	M
A0811_1_1	Nycteribia schmidlii	M	no	2017-09-07	Fall	Mișin Kamak	Cave	A0811	Miniopterus schreibersii	M
A0811_2_1	Nycteribia schmidlii	F	no	2017-09-07	Fall	Mișin Kamak	Cave	A0811	Miniopterus schreibersii	M
A0812_1_1	Penicillidia conspicua	M	no	2017-09-07	Fall	Mișin Kamak	Cave	A0812	Miniopterus schreibersii	F
A0815_1_1	Nycteribia schmidlii	M	no	2017-09-07	Fall	Mișin Kamak	Cave	A0815	Miniopterus schreibersii	M
A0815_2_1	Nycteribia schmidlii	F	no	2017-09-07	Fall	Mișin Kamak	Cave	A0815	Miniopterus schreibersii	M
A0815_2_2	Nycteribia schmidlii	F	no	2017-09-07	Fall	Mișin Kamak	Cave	A0815	Miniopterus schreibersii	M
A0816_1_1	Nycteribia schmidlii	M	no	2017-09-07	Fall	Mișin Kamak	Cave	A0816	Miniopterus schreibersii	M
A0816_2_1	Nycteribia schmidlii	F	no	2017-09-07	Fall	Mișin Kamak	Cave	A0816	Miniopterus schreibersii	M
A0816_2_2	Nycteribia schmidlii	F	no	2017-09-07	Fall	Mișin Kamak	Cave	A0816	Miniopterus schreibersii	M
A0816_2_3	Nycteribia schmidlii	F	no	2017-09-07	Fall	Mișin Kamak	Cave	A0816	Miniopterus schreibersii	M
A0820_1_1	Phthiridium biarticulatum	M	no	2017-09-07	Fall	Mișin Kamak	Cave	A0820	Rhinolophus euryale	M
A0820_2_1	Phthiridium biarticulatum	F	no	2017-09-07	Fall	Mișin Kamak	Cave	A0820	Rhinolophus euryale	M
A0820_2_2	Phthiridium biarticulatum	F	no	2017-09-07	Fall	Mișin Kamak	Cave	A0820	Rhinolophus euryale	M
A0820_2_3	Phthiridium biarticulatum	F	no	2017-09-07	Fall	Mișin Kamak	Cave	A0820	Rhinolophus euryale	M
A0821_1_1	Nycteribia pedicularia	M	no	2017-09-07	Fall	Mișin Kamak	Cave	A0821	Myotis capaccinii	F
A0821_1_2	Nycteribia pedicularia	M	no	2017-09-07	Fall	Mișin Kamak	Cave	A0821	Myotis capaccinii	F
A0821_1_3	Nycteribia pedicularia	M	no	2017-09-07	Fall	Mișin Kamak	Cave	A0821	Myotis capaccinii	F
A0821_1_4	Nycteribia pedicularia	M	no	2017-09-07	Fall	Mișin Kamak	Cave	A0821	Myotis capaccinii	F
A0821_2_1	Nycteribia pedicularia	F	no	2017-09-07	Fall	Mișin Kamak	Cave	A0821	Myotis capaccinii	F
A0822_1_1	Penicillidia dufourii	M	no	2017-09-07	Fall	Mișin Kamak	Cave	A0822	Myotis capaccinii	F
A0822_2_1	Nycteribia pedicularia	M	no	2017-09-07	Fall	Mișin Kamak	Cave	A0822	Myotis capaccinii	F
A0822_2_2	Nycteribia pedicularia	M	no	2017-09-07	Fall	Mișin Kamak	Cave	A0822	Myotis capaccinii	F
A0822_2_3	Nycteribia pedicularia	M	no	2017-09-07	Fall	Mișin Kamak	Cave	A0822	Myotis capaccinii	F
A0822_2_4	Nycteribia pedicularia	M	no	2017-09-07	Fall	Mișin Kamak	Cave	A0822	Myotis capaccinii	F
A0822_3_1	Nycteribia pedicularia	F	no	2017-09-07	Fall	Mișin Kamak	Cave	A0822	Myotis capaccinii	F
A0823_1_1	Nycteribia pedicularia	M	no	2017-09-07	Fall	Mișin Kamak	Cave	A0823	Myotis capaccinii	F
A0823_1_2	Nycteribia pedicularia	M	no	2017-09-07	Fall	Mișin Kamak	Cave	A0823	Myotis capaccinii	F
A0823_2_1	Nycteribia pedicularia	F	yes	2017-09-07	Fall	Mișin Kamak	Cave	A0823	Myotis capaccinii	F
A0823_2_2	Nycteribia pedicularia	F	no	2017-09-07	Fall	Mișin Kamak	Cave	A0823	Myotis capaccinii	F
A0823_2_3	Nycteribia pedicularia	F	no	2017-09-07	Fall	Mișin Kamak	Cave	A0823	Myotis capaccinii	F
A0825_1_1	Penicillidia dufourii	M	no	2017-09-07	Fall	Mișin Kamak	Cave	A0825	Myotis capaccinii	M
A0825_2_1	Nycteribia pedicularia	M	no	2017-09-07	Fall	Mișin Kamak	Cave	A0825	Myotis capaccinii	M
A0825_2_2	Nycteribia pedicularia	M	no	2017-09-07	Fall	Mișin Kamak	Cave	A0825	Myotis capaccinii	M
A0825_3_1	Nycteribia pedicularia	F	no	2017-09-07	Fall	Mișin Kamak	Cave	A0825	Myotis capaccinii	M
A0825_3_2	Nycteribia pedicularia	F	no	2017-09-07	Fall	Mișin Kamak	Cave	A0825	Myotis capaccinii	M
A0826_1_1	Nycteribia pedicularia	M	no	2017-09-07	Fall	Mișin Kamak	Cave	A0826	Myotis capaccinii	F
A0826_2_1	Nycteribia pedicularia	F	no	2017-09-07	Fall	Mișin Kamak	Cave	A0826	Myotis capaccinii	F
A0827_1_1	Phthiridium biarticulatum	M	no	2017-09-07	Fall	Mișin Kamak	Cave	A0827	Rhinolophus ferrumequinum	M
A0827_1_2	Phthiridium biarticulatum	M	no	2017-09-07	Fall	Mișin Kamak	Cave	A0827	Rhinolophus ferrumequinum	M
A0827_1_3	Phthiridium biarticulatum	M	no	2017-09-07	Fall	Mișin Kamak	Cave	A0827	Rhinolophus ferrumequinum	M
A0827_1_4	Phthiridium biarticulatum	M	no	2017-09-07	Fall	Mișin Kamak	Cave	A0827	Rhinolophus ferrumequinum	M
A0828_1_1	Phthiridium biarticulatum	M	no	2017-09-07	Fall	Mișin Kamak	Cave	A0828	Rhinolophus euryale	M
A0828_1_2	Phthiridium biarticulatum	M	no	2017-09-07	Fall	Mișin Kamak	Cave	A0828	Rhinolophus euryale	M
A0829_1_1	Nycteribia pedicularia	M	no	2017-09-07	Fall	Mișin Kamak	Cave	A0829	Myotis capaccinii	M
A0829_1_2	Nycteribia pedicularia	M	no	2017-09-07	Fall	Mișin Kamak	Cave	A0829	Myotis capaccinii	M
A0829_2_1	Nycteribia pedicularia	F	no	2017-09-07	Fall	Mișin Kamak	Cave	A0829	Myotis capaccinii	M
A0829_2_2	Nycteribia pedicularia	F	no	2017-09-07	Fall	Mișin Kamak	Cave	A0829	Myotis capaccinii	M
A0829_2_3	Nycteribia pedicularia	F	no	2017-09-07	Fall	Mișin Kamak	Cave	A0829	Myotis capaccinii	M
A0830_1_1	Nycteribia pedicularia	M	no	2017-09-07	Fall	Mișin Kamak	Cave	A0830	Myotis capaccinii	F
A0830_1_2	Nycteribia pedicularia	M	no	2017-09-07	Fall	Mișin Kamak	Cave	A0830	Myotis capaccinii	F
A0830_1_3	Nycteribia pedicularia	M	no	2017-09-07	Fall	Mișin Kamak	Cave	A0830	Myotis capaccinii	F
A0830_1_4	Nycteribia pedicularia	M	no	2017-09-07	Fall	Mișin Kamak	Cave	A0830	Myotis capaccinii	F
A0830_1_5	Nycteribia pedicularia	M	no	2017-09-07	Fall	Mișin Kamak	Cave	A0830	Myotis capaccinii	F
A0830_2_1	Nycteribia pedicularia	F	no	2017-09-07	Fall	Mișin Kamak	Cave	A0830	Myotis capaccinii	F
A0830_2_2	Nycteribia pedicularia	F	no	2017-09-07	Fall	Mișin Kamak	Cave	A0830	Myotis capaccinii	F
A0830_2_3	Nycteribia pedicularia	F	no	2017-09-07	Fall	Mișin Kamak	Cave	A0830	Myotis capaccinii	F
A0830_2_4	Nycteribia pedicularia	F	no	2017-09-07	Fall	Mișin Kamak	Cave	A0830	Myotis capaccinii	F
A0830_2_5	Nycteribia pedicularia	F	no	2017-09-07	Fall	Mișin Kamak	Cave	A0830	Myotis capaccinii	F
A0831_1_1	Phthiridium biarticulatum	F	no	2017-09-07	Fall	Mișin Kamak	Cave	A0831	Rhinolophus euryale	M
A0832_1_1	Nycteribia vexata	M	no	2017-09-07	Fall	Mișin Kamak	Cave	A0832	Myotis blythii	M
A0832_1_2	Nycteribia vexata	M	no	2017-09-07	Fall	Mișin Kamak	Cave	A0832	Myotis blythii	M
A0833_1_1	Basilia nana	M	no	2017-09-07	Fall	Mișin Kamak	Cave	A0833	Myotis bechsteinii	M
A0836_1_1	Nycteribia schmidlii	F	no	2017-09-07	Fall	Mișin Kamak	Cave	A0836	Miniopterus schreibersii	M
A0837_1_1	Penicillidia conspicua	M	yes	2017-09-07	Fall	Mișin Kamak	Cave	A0837	Miniopterus schreibersii	M
A0837_2_1	Penicillidia dufourii	F	no	2017-09-07	Fall	Mișin Kamak	Cave	A0837	Miniopterus schreibersii	M
A0839_1_1	Penicillidia conspicua	M	no	2017-09-07	Fall	Mișin Kamak	Cave	A0839	Miniopterus schreibersii	F
A0839_2_1	Nycteribia schmidlii	F	no	2017-09-07	Fall	Mișin Kamak	Cave	A0839	Miniopterus schreibersii	F
A0841_1_1	Penicillidia conspicua	M	yes	2017-09-07	Fall	Mișin Kamak	Cave	A0841	Miniopterus schreibersii	M
A0841_1_2	Penicillidia conspicua	M	no	2017-09-07	Fall	Mișin Kamak	Cave	A0841	Miniopterus schreibersii	M
A0841_1_3	Penicillidia conspicua	M	no	2017-09-07	Fall	Mișin Kamak	Cave	A0841	Miniopterus schreibersii	M
A0841_2_1	Penicillidia conspicua	F	no	2017-09-07	Fall	Mișin Kamak	Cave	A0841	Miniopterus schreibersii	M
A0841_3_1	Phthiridium biarticulatum	F	no	2017-09-07	Fall	Mișin Kamak	Cave	A0841	Miniopterus schreibersii	M
A0842_1_1	Phthiridium biarticulatum	F	no	2017-09-08	Fall	Devetashka Pesthera	Cave	A0842	Rhinolophus euryale	M
A0843_1_1	Phthiridium biarticulatum	F	no	2017-09-08	Fall	Devetashka Pesthera	Cave	A0843	Rhinolophus euryale	F
A0843_1_2	Phthiridium biarticulatum	F	no	2017-09-08	Fall	Devetashka Pesthera	Cave	A0843	Rhinolophus euryale	F
A0843_1_3	Phthiridium biarticulatum	F	no	2017-09-08	Fall	Devetashka Pesthera	Cave	A0843	Rhinolophus euryale	F
A0844_1_1	Phthiridium biarticulatum	F	no	2017-09-08	Fall	Devetashka Pesthera	Cave	A0844	Rhinolophus euryale	F
A0845_1_1	Phthiridium biarticulatum	M	no	2017-09-08	Fall	Devetashka Pesthera	Cave	A0845	Rhinolophus euryale	F
A0845_2_1	Phthiridium biarticulatum	F	no	2017-09-08	Fall	Devetashka Pesthera	Cave	A0845	Rhinolophus euryale	F
A0848_1_1	Phthiridium biarticulatum	M	no	2017-09-08	Fall	Devetashka Pesthera	Cave	A0848	Rhinolophus mehelyi	F
A0848_2_1	Phthiridium biarticulatum	F	no	2017-09-08	Fall	Devetashka Pesthera	Cave	A0848	Rhinolophus mehelyi	F
A0849_1_1	Phthiridium biarticulatum	M	no	2017-09-08	Fall	Devetashka Pesthera	Cave	A0849	Rhinolophus euryale	F
A0852_1_1	Phthiridium biarticulatum	M	no	2017-09-08	Fall	Devetashka Pesthera	Cave	A0852	Rhinolophus euryale	F
A0853_1_1	Phthiridium biarticulatum	M	no	2017-09-08	Fall	Devetashka Pesthera	Cave	A0853	Rhinolophus euryale	F
A0853_1_2	Phthiridium biarticulatum	M	no	2017-09-08	Fall	Devetashka Pesthera	Cave	A0853	Rhinolophus euryale	F
A0853_2_1	Phthiridium biarticulatum	F	no	2017-09-08	Fall	Devetashka Pesthera	Cave	A0853	Rhinolophus euryale	F
A0854_1_1	Phthiridium biarticulatum	F	no	2017-09-08	Fall	Devetashka Pesthera	Cave	A0854	Rhinolophus euryale	F
A0856_1_1	Phthiridium biarticulatum	M	no	2017-09-08	Fall	Devetashka Pesthera	Cave	A0856	Rhinolophus euryale	F
A0857_1_1	Nycteribia kolenatii	F	no	2017-09-08	Fall	Devetashka Pesthera	Cave	A0857	Myotis daubentonii	M
A0857_1_2	Nycteribia kolenatii	F	no	2017-09-08	Fall	Devetashka Pesthera	Cave	A0857	Myotis daubentonii	M
A0857_1_3	Nycteribia kolenatii	F	no	2017-09-08	Fall	Devetashka Pesthera	Cave	A0857	Myotis daubentonii	M
A0858_1_1	Penicillidia conspicua	M	no	2017-09-08	Fall	Devetashka Pesthera	Cave	A0858	Miniopterus schreibersii	F
A0858_2_1	Penicillidia conspicua	F	no	2017-09-08	Fall	Devetashka Pesthera	Cave	A0858	Miniopterus schreibersii	F
A0858_2_2	Penicillidia conspicua	F	no	2017-09-08	Fall	Devetashka Pesthera	Cave	A0858	Miniopterus schreibersii	F
A0858_2_3	Penicillidia conspicua	F	no	2017-09-08	Fall	Devetashka Pesthera	Cave	A0858	Miniopterus schreibersii	F
A0859_1_1	Nycteribia schmidlii	M	no	2017-09-08	Fall	Devetashka Pesthera	Cave	A0859	Miniopterus schreibersii	M
A0860_1_1	Penicillidia conspicua	M	yes	2017-09-08	Fall	Devetashka Pesthera	Cave	A0860	Miniopterus schreibersii	M
A0860_2_1	Penicillidia conspicua	F	no	2017-09-08	Fall	Devetashka Pesthera	Cave	A0860	Miniopterus schreibersii	M
A0861_1_1	Nycteribia schmidlii	M	no	2017-09-08	Fall	Devetashka Pesthera	Cave	A0861	Miniopterus schreibersii	M
A0863_1_1	Nycteribia schmidlii	F	no	2017-09-08	Fall	Devetashka Pesthera	Cave	A0863	Miniopterus schreibersii	F
A0864_1_1	Nycteribia schmidlii	M	no	2017-09-08	Fall	Devetashka Pesthera	Cave	A0864	Miniopterus schreibersii	M
A0864_2_1	Nycteribia schmidlii	F	no	2017-09-08	Fall	Devetashka Pesthera	Cave	A0864	Miniopterus schreibersii	M
A0864_2_2	Nycteribia schmidlii	F	no	2017-09-08	Fall	Devetashka Pesthera	Cave	A0864	Miniopterus schreibersii	M
A0865_1_1	Penicillidia conspicua	M	no	2017-09-08	Fall	Devetashka Pesthera	Cave	A0865	Miniopterus schreibersii	F
A0865_2_1	Nycteribia schmidlii	M	no	2017-09-08	Fall	Devetashka Pesthera	Cave	A0865	Miniopterus schreibersii	F
A0865_2_2	Nycteribia schmidlii	M	no	2017-09-08	Fall	Devetashka Pesthera	Cave	A0865	Miniopterus schreibersii	F
A0865_2_3	Nycteribia schmidlii	M	no	2017-09-08	Fall	Devetashka Pesthera	Cave	A0865	Miniopterus schreibersii	F
A0865_3_1	Nycteribia schmidlii	F	no	2017-09-08	Fall	Devetashka Pesthera	Cave	A0865	Miniopterus schreibersii	F
A0866_1_1	Nycteribia schmidlii	F	no	2017-09-08	Fall	Devetashka Pesthera	Cave	A0866	Miniopterus schreibersii	M
A0867_1_1	Penicillidia dufourii	M	no	2017-09-08	Fall	Devetashka Pesthera	Cave	A0867	Miniopterus schreibersii	M
A0867_2_1	Penicillidia conspicua	F	no	2017-09-08	Fall	Devetashka Pesthera	Cave	A0867	Miniopterus schreibersii	M
A0868_1_1	Nycteribia schmidlii	M	no	2017-09-08	Fall	Devetashka Pesthera	Cave	A0868	Miniopterus schreibersii	M
A0868_1_2	Nycteribia schmidlii	M	no	2017-09-08	Fall	Devetashka Pesthera	Cave	A0868	Miniopterus schreibersii	M
A0868_1_3	Nycteribia schmidlii	M	no	2017-09-08	Fall	Devetashka Pesthera	Cave	A0868	Miniopterus schreibersii	M
A0868_1_4	Nycteribia schmidlii	M	no	2017-09-08	Fall	Devetashka Pesthera	Cave	A0868	Miniopterus schreibersii	M
A0869_1_1	Nycteribia schmidlii	M	no	2017-09-08	Fall	Devetashka Pesthera	Cave	A0869	Miniopterus schreibersii	F
A0869_2_1	Nycteribia schmidlii	F	no	2017-09-08	Fall	Devetashka Pesthera	Cave	A0869	Miniopterus schreibersii	F
A0870_1_1	Nycteribia schmidlii	F	no	2017-09-08	Fall	Devetashka Pesthera	Cave	A0870	Miniopterus schreibersii	F
A0871_1_1	Penicillidia conspicua	M	no	2017-09-08	Fall	Devetashka Pesthera	Cave	A0871	Miniopterus schreibersii	M
A0872_1_1	Penicillidia conspicua	M	no	2017-09-08	Fall	Devetashka Pesthera	Cave	A0872	Miniopterus schreibersii	M
A0872_2_1	Penicillidia conspicua	F	no	2017-09-08	Fall	Devetashka Pesthera	Cave	A0872	Miniopterus schreibersii	M
A0872_2_2	Penicillidia conspicua	F	no	2017-09-08	Fall	Devetashka Pesthera	Cave	A0872	Miniopterus schreibersii	M
A0872_2_3	Penicillidia conspicua	F	no	2017-09-08	Fall	Devetashka Pesthera	Cave	A0872	Miniopterus schreibersii	M
A0872_2_4	Penicillidia conspicua	F	no	2017-09-08	Fall	Devetashka Pesthera	Cave	A0872	Miniopterus schreibersii	M
A0872_3_1	Nycteribia schmidlii	F	no	2017-09-08	Fall	Devetashka Pesthera	Cave	A0872	Miniopterus schreibersii	M
A0873_1_1	Nycteribia schmidlii	F	no	2017-09-08	Fall	Devetashka Pesthera	Cave	A0873	Miniopterus schreibersii	M
A0873_1_2	Nycteribia schmidlii	F	no	2017-09-08	Fall	Devetashka Pesthera	Cave	A0873	Miniopterus schreibersii	M
A0874_1_1	Nycteribia schmidlii	F	no	2017-09-08	Fall	Devetashka Pesthera	Cave	A0874	Miniopterus schreibersii	M
A0874_1_2	Nycteribia schmidlii	F	no	2017-09-08	Fall	Devetashka Pesthera	Cave	A0874	Miniopterus schreibersii	M
A0874_1_3	Nycteribia schmidlii	F	no	2017-09-08	Fall	Devetashka Pesthera	Cave	A0874	Miniopterus schreibersii	M
A0875_1_1	Penicillidia conspicua	F	no	2017-09-08	Fall	Devetashka Pesthera	Cave	A0875	Miniopterus schreibersii	M
A0877_1_1	Nycteribia schmidlii	M	no	2017-09-08	Fall	Devetashka Pesthera	Cave	A0877	Miniopterus schreibersii	M
A0878_1_1	Nycteribia schmidlii	M	no	2017-09-08	Fall	Devetashka Pesthera	Cave	A0878	Miniopterus schreibersii	F
A0878_2_1	Nycteribia schmidlii	F	no	2017-09-08	Fall	Devetashka Pesthera	Cave	A0878	Miniopterus schreibersii	F
A0879_1_1	Nycteribia schmidlii	F	no	2017-09-08	Fall	Devetashka Pesthera	Cave	A0879	Miniopterus schreibersii	M
A0881_1_1	Nycteribia pedicularia	M	no	2017-09-08	Fall	Devetashka Pesthera	Cave	A0881	Myotis capaccinii	F
A0881_2_1	Nycteribia pedicularia	F	no	2017-09-08	Fall	Devetashka Pesthera	Cave	A0881	Myotis capaccinii	F
A0882_1_1	Phthiridium biarticulatum	M	no	2017-09-08	Fall	Devetashka Pesthera	Cave	A0882	Rhinolophus euryale	M
A0882_2_1	Phthiridium biarticulatum	F	no	2017-09-08	Fall	Devetashka Pesthera	Cave	A0882	Rhinolophus euryale	M
A0882_2_2	Phthiridium biarticulatum	F	no	2017-09-08	Fall	Devetashka Pesthera	Cave	A0882	Rhinolophus euryale	M
A0885_1_1	Phthiridium biarticulatum	M	no	2017-09-08	Fall	Devetashka Pesthera	Cave	A0885	Rhinolophus euryale	F
A0885_2_1	Phthiridium biarticulatum	F	yes	2017-09-08	Fall	Devetashka Pesthera	Cave	A0885	Rhinolophus euryale	F
A0886_1_1	Phthiridium biarticulatum	F	no	2017-09-08	Fall	Devetashka Pesthera	Cave	A0886	Rhinolophus euryale	F
A0887_1_1	Nycteribia pedicularia	M	no	2017-09-08	Fall	Devetashka Pesthera	Cave	A0887	Myotis capaccinii	F
A0887_1_2	Nycteribia pedicularia	M	no	2017-09-08	Fall	Devetashka Pesthera	Cave	A0887	Myotis capaccinii	F
A0887_2_1	Nycteribia pedicularia	F	no	2017-09-08	Fall	Devetashka Pesthera	Cave	A0887	Myotis capaccinii	F
A0888_1_1	Phthiridium biarticulatum	F	no	2017-09-08	Fall	Devetashka Pesthera	Cave	A0888	Rhinolophus euryale	M
A0889_1_1	Nycteribia kolenatii	F	no	2017-09-08	Fall	Devetashka Pesthera	Cave	A0889	Myotis daubentonii	M
A0889_1_2	Nycteribia kolenatii	F	no	2017-09-08	Fall	Devetashka Pesthera	Cave	A0889	Myotis daubentonii	M
A0890_1_1	Phthiridium biarticulatum	M	no	2017-09-08	Fall	Devetashka Pesthera	Cave	A0890	Rhinolophus euryale	M
A0890_1_2	Phthiridium biarticulatum	M	no	2017-09-08	Fall	Devetashka Pesthera	Cave	A0890	Rhinolophus euryale	M
A0890_2_1	Phthiridium biarticulatum	F	no	2017-09-08	Fall	Devetashka Pesthera	Cave	A0890	Rhinolophus euryale	M
A0890_2_2	Phthiridium biarticulatum	F	no	2017-09-08	Fall	Devetashka Pesthera	Cave	A0890	Rhinolophus euryale	M
A0890_2_3	Phthiridium biarticulatum	F	no	2017-09-08	Fall	Devetashka Pesthera	Cave	A0890	Rhinolophus euryale	M
A0892_1_1	Phthiridium biarticulatum	F	no	2017-09-08	Fall	Devetashka Pesthera	Cave	A0892	Rhinolophus euryale	M
A0894_1_1	Phthiridium biarticulatum	M	no	2017-09-08	Fall	Devetashka Pesthera	Cave	A0894	Rhinolophus euryale	M
A0895_1_1	Phthiridium biarticulatum	M	no	2017-09-08	Fall	Devetashka Pesthera	Cave	A0895	Rhinolophus euryale	F
A0895_2_1	Phthiridium biarticulatum	F	no	2017-09-08	Fall	Devetashka Pesthera	Cave	A0895	Rhinolophus euryale	F
A0895_2_2	Phthiridium biarticulatum	F	no	2017-09-08	Fall	Devetashka Pesthera	Cave	A0895	Rhinolophus euryale	F
A0897_1_1	Phthiridium biarticulatum	M	no	2017-09-08	Fall	Devetashka Pesthera	Cave	A0897	Rhinolophus ferrumequinum	F
A0897_2_1	Phthiridium biarticulatum	F	no	2017-09-08	Fall	Devetashka Pesthera	Cave	A0897	Rhinolophus ferrumequinum	F
A0898_1_1	Phthiridium biarticulatum	M	no	2017-09-08	Fall	Devetashka Pesthera	Cave	A0898	Rhinolophus euryale	M
A0899_1_1	Nycteribia pedicularia	M	no	2017-09-08	Fall	Devetashka Pesthera	Cave	A0899	Myotis capaccinii	F
A0899_1_2	Nycteribia pedicularia	M	no	2017-09-08	Fall	Devetashka Pesthera	Cave	A0899	Myotis capaccinii	F
A0899_1_3	Nycteribia pedicularia	M	no	2017-09-08	Fall	Devetashka Pesthera	Cave	A0899	Myotis capaccinii	F
A0899_1_4	Nycteribia pedicularia	M	no	2017-09-08	Fall	Devetashka Pesthera	Cave	A0899	Myotis capaccinii	F
A0899_2_1	Nycteribia pedicularia	F	no	2017-09-08	Fall	Devetashka Pesthera	Cave	A0899	Myotis capaccinii	F
A0902_1_1	Nycteribia pedicularia	M	no	2017-09-09	Fall	Mandrata Peshtera	Cave	A0902	Myotis capaccinii	F
A0902_1_2	Nycteribia pedicularia	M	no	2017-09-09	Fall	Mandrata Peshtera	Cave	A0902	Myotis capaccinii	F
A0902_1_3	Nycteribia pedicularia	M	no	2017-09-09	Fall	Mandrata Peshtera	Cave	A0902	Myotis capaccinii	F
A0902_1_4	Nycteribia pedicularia	M	no	2017-09-09	Fall	Mandrata Peshtera	Cave	A0902	Myotis capaccinii	F
A0902_1_5	Nycteribia pedicularia	M	no	2017-09-09	Fall	Mandrata Peshtera	Cave	A0902	Myotis capaccinii	F
A0902_1_6	Nycteribia pedicularia	M	no	2017-09-09	Fall	Mandrata Peshtera	Cave	A0902	Myotis capaccinii	F
A0902_2_1	Nycteribia pedicularia	F	no	2017-09-09	Fall	Mandrata Peshtera	Cave	A0902	Myotis capaccinii	F
A0902_2_2	Nycteribia pedicularia	F	no	2017-09-09	Fall	Mandrata Peshtera	Cave	A0902	Myotis capaccinii	F
A0902_2_3	Nycteribia pedicularia	F	no	2017-09-09	Fall	Mandrata Peshtera	Cave	A0902	Myotis capaccinii	F
A0903_1_1	Nycteribia pedicularia	M	no	2017-09-09	Fall	Mandrata Peshtera	Cave	A0903	Myotis capaccinii	F
A0903_1_2	Nycteribia pedicularia	M	no	2017-09-09	Fall	Mandrata Peshtera	Cave	A0903	Myotis capaccinii	F
A0903_1_3	Nycteribia pedicularia	M	no	2017-09-09	Fall	Mandrata Peshtera	Cave	A0903	Myotis capaccinii	F
A0903_1_4	Nycteribia pedicularia	M	no	2017-09-09	Fall	Mandrata Peshtera	Cave	A0903	Myotis capaccinii	F
A0903_1_5	Nycteribia pedicularia	M	no	2017-09-09	Fall	Mandrata Peshtera	Cave	A0903	Myotis capaccinii	F
A0903_2_1	Nycteribia pedicularia	F	no	2017-09-09	Fall	Mandrata Peshtera	Cave	A0903	Myotis capaccinii	F
A0903_2_2	Nycteribia pedicularia	F	no	2017-09-09	Fall	Mandrata Peshtera	Cave	A0903	Myotis capaccinii	F
A0903_2_3	Nycteribia pedicularia	F	no	2017-09-09	Fall	Mandrata Peshtera	Cave	A0903	Myotis capaccinii	F
A0903_3_1	Penicillidia dufourii	F	no	2017-09-09	Fall	Mandrata Peshtera	Cave	A0903	Myotis capaccinii	F
A0905_1_1	Nycteribia pedicularia	M	no	2017-09-09	Fall	Mandrata Peshtera	Cave	A0905	Myotis capaccinii	F
A0905_1_2	Nycteribia pedicularia	M	no	2017-09-09	Fall	Mandrata Peshtera	Cave	A0905	Myotis capaccinii	F
A0905_2_1	Nycteribia pedicularia	F	no	2017-09-09	Fall	Mandrata Peshtera	Cave	A0905	Myotis capaccinii	F
A0905_2_2	Nycteribia pedicularia	F	no	2017-09-09	Fall	Mandrata Peshtera	Cave	A0905	Myotis capaccinii	F
A0905_2_3	Nycteribia pedicularia	F	no	2017-09-09	Fall	Mandrata Peshtera	Cave	A0905	Myotis capaccinii	F
A0905_2_4	Nycteribia pedicularia	F	no	2017-09-09	Fall	Mandrata Peshtera	Cave	A0905	Myotis capaccinii	F
A0905_2_5	Nycteribia pedicularia	F	no	2017-09-09	Fall	Mandrata Peshtera	Cave	A0905	Myotis capaccinii	F
A0906_1_1	Nycteribia pedicularia	M	no	2017-09-09	Fall	Mandrata Peshtera	Cave	A0906	Myotis capaccinii	F
A0906_1_2	Nycteribia pedicularia	M	no	2017-09-09	Fall	Mandrata Peshtera	Cave	A0906	Myotis capaccinii	F
A0906_2_1	Nycteribia pedicularia	F	no	2017-09-09	Fall	Mandrata Peshtera	Cave	A0906	Myotis capaccinii	F
A0906_2_2	Nycteribia pedicularia	F	no	2017-09-09	Fall	Mandrata Peshtera	Cave	A0906	Myotis capaccinii	F
A0906_2_3	Nycteribia pedicularia	F	no	2017-09-09	Fall	Mandrata Peshtera	Cave	A0906	Myotis capaccinii	F
A0907_1_1	Nycteribia pedicularia	M	no	2017-09-09	Fall	Mandrata Peshtera	Cave	A0907	Myotis capaccinii	F
A0907_2_1	Nycteribia pedicularia	F	no	2017-09-09	Fall	Mandrata Peshtera	Cave	A0907	Myotis capaccinii	F
A0907_2_2	Nycteribia pedicularia	F	no	2017-09-09	Fall	Mandrata Peshtera	Cave	A0907	Myotis capaccinii	F
A0907_2_3	Nycteribia pedicularia	F	no	2017-09-09	Fall	Mandrata Peshtera	Cave	A0907	Myotis capaccinii	F
A0908_1_1	Phthiridium biarticulatum	M	no	2017-09-09	Fall	Mandrata Peshtera	Cave	A0908	Rhinolophus euryale	F
A0909_1_1	Phthiridium biarticulatum	M	no	2017-09-09	Fall	Mandrata Peshtera	Cave	A0909	Rhinolophus euryale	F
A0911_1_1	Nycteribia pedicularia	M	no	2017-09-09	Fall	Mandrata Peshtera	Cave	A0911	Myotis capaccinii	F
A0911_1_2	Nycteribia pedicularia	M	no	2017-09-09	Fall	Mandrata Peshtera	Cave	A0911	Myotis capaccinii	F
A0911_1_3	Nycteribia pedicularia	M	no	2017-09-09	Fall	Mandrata Peshtera	Cave	A0911	Myotis capaccinii	F
A0911_1_4	Nycteribia pedicularia	M	no	2017-09-09	Fall	Mandrata Peshtera	Cave	A0911	Myotis capaccinii	F
A0911_1_5	Nycteribia pedicularia	M	no	2017-09-09	Fall	Mandrata Peshtera	Cave	A0911	Myotis capaccinii	F
A0911_1_6	Nycteribia pedicularia	M	no	2017-09-09	Fall	Mandrata Peshtera	Cave	A0911	Myotis capaccinii	F
A0911_1_7	Nycteribia pedicularia	M	no	2017-09-09	Fall	Mandrata Peshtera	Cave	A0911	Myotis capaccinii	F
A0911_2_1	Nycteribia pedicularia	F	no	2017-09-09	Fall	Mandrata Peshtera	Cave	A0911	Myotis capaccinii	F
A0911_2_2	Nycteribia pedicularia	F	no	2017-09-09	Fall	Mandrata Peshtera	Cave	A0911	Myotis capaccinii	F
A0911_2_3	Nycteribia pedicularia	F	no	2017-09-09	Fall	Mandrata Peshtera	Cave	A0911	Myotis capaccinii	F
A0912_1_1	Nycteribia pedicularia	M	no	2017-09-09	Fall	Mandrata Peshtera	Cave	A0912	Myotis capaccinii	M
A0912_1_2	Nycteribia pedicularia	M	no	2017-09-09	Fall	Mandrata Peshtera	Cave	A0912	Myotis capaccinii	M
A0912_2_1	Nycteribia pedicularia	F	no	2017-09-09	Fall	Mandrata Peshtera	Cave	A0912	Myotis capaccinii	M
A0913_1_1	Phthiridium biarticulatum	F	no	2017-09-09	Fall	Mandrata Peshtera	Cave	A0913	Rhinolophus euryale	F
A0913_1_2	Phthiridium biarticulatum	F	no	2017-09-09	Fall	Mandrata Peshtera	Cave	A0913	Rhinolophus euryale	F
A0915_1_1	Nycteribia pedicularia	F	no	2017-09-09	Fall	Mandrata Peshtera	Cave	A0915	Myotis capaccinii	F
A0916_1_1	Nycteribia kolenatii	F	no	2017-09-09	Fall	Mandrata Peshtera	Cave	A0916	Myotis daubentonii	M
A0916_1_2	Nycteribia kolenatii	F	no	2017-09-09	Fall	Mandrata Peshtera	Cave	A0916	Myotis daubentonii	M
A0917_1_1	Nycteribia pedicularia	M	no	2017-09-09	Fall	Mandrata Peshtera	Cave	A0917	Myotis capaccinii	M
A0917_1_2	Nycteribia pedicularia	M	no	2017-09-09	Fall	Mandrata Peshtera	Cave	A0917	Myotis capaccinii	M
A0917_1_3	Nycteribia pedicularia	M	no	2017-09-09	Fall	Mandrata Peshtera	Cave	A0917	Myotis capaccinii	M
A0917_1_4	Nycteribia pedicularia	M	no	2017-09-09	Fall	Mandrata Peshtera	Cave	A0917	Myotis capaccinii	M
A0917_2_1	Nycteribia pedicularia	F	no	2017-09-09	Fall	Mandrata Peshtera	Cave	A0917	Myotis capaccinii	M
A0917_2_2	Nycteribia pedicularia	F	no	2017-09-09	Fall	Mandrata Peshtera	Cave	A0917	Myotis capaccinii	M
A0917_2_3	Nycteribia pedicularia	F	no	2017-09-09	Fall	Mandrata Peshtera	Cave	A0917	Myotis capaccinii	M
A0917_2_4	Nycteribia pedicularia	F	no	2017-09-09	Fall	Mandrata Peshtera	Cave	A0917	Myotis capaccinii	M
A0917_2_5	Nycteribia pedicularia	F	no	2017-09-09	Fall	Mandrata Peshtera	Cave	A0917	Myotis capaccinii	M
A0917_2_6	Nycteribia pedicularia	F	no	2017-09-09	Fall	Mandrata Peshtera	Cave	A0917	Myotis capaccinii	M
A0917_2_7	Nycteribia pedicularia	F	no	2017-09-09	Fall	Mandrata Peshtera	Cave	A0917	Myotis capaccinii	M
A0917_2_8	Nycteribia pedicularia	F	no	2017-09-09	Fall	Mandrata Peshtera	Cave	A0917	Myotis capaccinii	M
A0917_2_9	Nycteribia pedicularia	F	no	2017-09-09	Fall	Mandrata Peshtera	Cave	A0917	Myotis capaccinii	M
A0917_3_1	Nycteribia pedicularia	M	no	2017-09-09	Fall	Mandrata Peshtera	Cave	A0917	Myotis capaccinii	M
A0918_1_1	Nycteribia pedicularia	M	no	2017-09-09	Fall	Mandrata Peshtera	Cave	A0918	Myotis capaccinii	F
A0918_1_2	Nycteribia pedicularia	M	no	2017-09-09	Fall	Mandrata Peshtera	Cave	A0918	Myotis capaccinii	F
A0918_2_1	Nycteribia pedicularia	F	no	2017-09-09	Fall	Mandrata Peshtera	Cave	A0918	Myotis capaccinii	F
A0919_1_1	Nycteribia pedicularia	M	no	2017-09-09	Fall	Mandrata Peshtera	Cave	A0919	Myotis capaccinii	F
A0919_1_2	Nycteribia pedicularia	M	no	2017-09-09	Fall	Mandrata Peshtera	Cave	A0919	Myotis capaccinii	F
A0919_1_3	Nycteribia pedicularia	M	no	2017-09-09	Fall	Mandrata Peshtera	Cave	A0919	Myotis capaccinii	F
A0919_1_4	Nycteribia pedicularia	M	no	2017-09-09	Fall	Mandrata Peshtera	Cave	A0919	Myotis capaccinii	F
A0920_1_1	Nycteribia pedicularia	M	no	2017-09-09	Fall	Mandrata Peshtera	Cave	A0920	Myotis capaccinii	F
A0920_1_2	Nycteribia pedicularia	M	no	2017-09-09	Fall	Mandrata Peshtera	Cave	A0920	Myotis capaccinii	F
A0920_1_3	Nycteribia pedicularia	M	no	2017-09-09	Fall	Mandrata Peshtera	Cave	A0920	Myotis capaccinii	F
A0920_1_4	Nycteribia pedicularia	M	no	2017-09-09	Fall	Mandrata Peshtera	Cave	A0920	Myotis capaccinii	F
A0921_1_1	Nycteribia vexata	M	no	2017-09-09	Fall	Mandrata Peshtera	Cave	A0921	Myotis myotis	F
A0922_1_1	Penicillidia dufourii	M	no	2017-09-09	Fall	Mandrata Peshtera	Cave	A0922	Myotis myotis	M
A0923_1_1	Nycteribia pedicularia	F	no	2017-09-09	Fall	Mandrata Peshtera	Cave	A0923	Myotis capaccinii	F
A0923_1_2	Nycteribia pedicularia	F	no	2017-09-09	Fall	Mandrata Peshtera	Cave	A0923	Myotis capaccinii	F
A0923_1_3	Nycteribia pedicularia	F	no	2017-09-09	Fall	Mandrata Peshtera	Cave	A0923	Myotis capaccinii	F
A0924_1_1	Penicillidia dufourii	M	no	2017-09-09	Fall	Mandrata Peshtera	Cave	A0924	Myotis myotis	F
A0924_1_2	Penicillidia dufourii	M	no	2017-09-09	Fall	Mandrata Peshtera	Cave	A0924	Myotis myotis	F
A0925_1_1	Nycteribia pedicularia	M	no	2017-09-09	Fall	Mandrata Peshtera	Cave	A0925	Myotis capaccinii	F
A0925_1_2	Nycteribia pedicularia	M	no	2017-09-09	Fall	Mandrata Peshtera	Cave	A0925	Myotis capaccinii	F
A0925_1_3	Nycteribia pedicularia	M	no	2017-09-09	Fall	Mandrata Peshtera	Cave	A0925	Myotis capaccinii	F
A0925_1_4	Nycteribia pedicularia	M	no	2017-09-09	Fall	Mandrata Peshtera	Cave	A0925	Myotis capaccinii	F
A0925_1_5	Nycteribia pedicularia	M	no	2017-09-09	Fall	Mandrata Peshtera	Cave	A0925	Myotis capaccinii	F
A0925_1_6	Nycteribia pedicularia	M	no	2017-09-09	Fall	Mandrata Peshtera	Cave	A0925	Myotis capaccinii	F
A0925_2_1	Nycteribia pedicularia	F	no	2017-09-09	Fall	Mandrata Peshtera	Cave	A0925	Myotis capaccinii	F
A0925_2_2	Nycteribia pedicularia	F	no	2017-09-09	Fall	Mandrata Peshtera	Cave	A0925	Myotis capaccinii	F
A0925_2_3	Nycteribia pedicularia	F	no	2017-09-09	Fall	Mandrata Peshtera	Cave	A0925	Myotis capaccinii	F
A0925_3_1	Penicillidia dufourii	F	no	2017-09-09	Fall	Mandrata Peshtera	Cave	A0925	Myotis capaccinii	F
A0927_1_1	Penicillidia dufourii	M	no	2017-09-09	Fall	Mandrata Peshtera	Cave	A0927	Myotis myotis	F
A0927_1_2	Penicillidia dufourii	M	no	2017-09-09	Fall	Mandrata Peshtera	Cave	A0927	Myotis myotis	F
A0927_2_1	Penicillidia dufourii	F	no	2017-09-09	Fall	Mandrata Peshtera	Cave	A0927	Myotis myotis	F
A0927_2_2	Penicillidia dufourii	F	no	2017-09-09	Fall	Mandrata Peshtera	Cave	A0927	Myotis myotis	F
A0930_1_1	Penicillidia dufourii	M	yes	2017-09-09	Fall	Mandrata Peshtera	Cave	A0930	Myotis myotis	F
A0931_1_1	Nycteribia pedicularia	M	no	2017-09-09	Fall	Mandrata Peshtera	Cave	A0931	Myotis capaccinii	F
A0931_1_2	Nycteribia pedicularia	M	no	2017-09-09	Fall	Mandrata Peshtera	Cave	A0931	Myotis capaccinii	F
A0931_1_3	Nycteribia pedicularia	M	no	2017-09-09	Fall	Mandrata Peshtera	Cave	A0931	Myotis capaccinii	F
A0931_2_1	Nycteribia pedicularia	F	no	2017-09-09	Fall	Mandrata Peshtera	Cave	A0931	Myotis capaccinii	F
A0931_2_2	Nycteribia pedicularia	F	no	2017-09-09	Fall	Mandrata Peshtera	Cave	A0931	Myotis capaccinii	F
A0931_2_3	Nycteribia pedicularia	F	no	2017-09-09	Fall	Mandrata Peshtera	Cave	A0931	Myotis capaccinii	F
A0931_2_4	Nycteribia pedicularia	F	no	2017-09-09	Fall	Mandrata Peshtera	Cave	A0931	Myotis capaccinii	F
A0931_2_5	Nycteribia pedicularia	F	no	2017-09-09	Fall	Mandrata Peshtera	Cave	A0931	Myotis capaccinii	F
A0932_1_1	Nycteribia latreilli	F	no	2017-09-09	Fall	Mandrata Peshtera	Cave	A0932	Myotis myotis	M
A0933_1_1	Nycteribia vexata	F	no	2017-09-09	Fall	Mandrata Peshtera	Cave	A0933	Myotis myotis	M
A0934_1_1	Nycteribia pedicularia	M	no	2017-09-09	Fall	Mandrata Peshtera	Cave	A0934	Myotis capaccinii	M
A0934_1_2	Nycteribia pedicularia	M	no	2017-09-09	Fall	Mandrata Peshtera	Cave	A0934	Myotis capaccinii	M
A0934_2_1	Nycteribia pedicularia	F	no	2017-09-09	Fall	Mandrata Peshtera	Cave	A0934	Myotis capaccinii	M
A0934_2_2	Nycteribia pedicularia	F	no	2017-09-09	Fall	Mandrata Peshtera	Cave	A0934	Myotis capaccinii	M
A0934_2_3	Nycteribia pedicularia	F	no	2017-09-09	Fall	Mandrata Peshtera	Cave	A0934	Myotis capaccinii	M
A0934_2_4	Nycteribia pedicularia	F	no	2017-09-09	Fall	Mandrata Peshtera	Cave	A0934	Myotis capaccinii	M
A0935_1_1	Nycteribia latreilli	F	no	2017-09-09	Fall	Mandrata Peshtera	Cave	A0935	Myotis myotis	F
A0936_1_1	Penicillidia dufourii	M	yes	2017-09-09	Fall	Mandrata Peshtera	Cave	A0936	Myotis myotis	F
A0936_1_2	Penicillidia dufourii	M	no	2017-09-09	Fall	Mandrata Peshtera	Cave	A0936	Myotis myotis	F
A0936_1_3	Penicillidia dufourii	M	no	2017-09-09	Fall	Mandrata Peshtera	Cave	A0936	Myotis myotis	F
A0936_1_4	Penicillidia dufourii	M	no	2017-09-09	Fall	Mandrata Peshtera	Cave	A0936	Myotis myotis	F
A0936_2_1	Penicillidia dufourii	F	no	2017-09-09	Fall	Mandrata Peshtera	Cave	A0936	Myotis myotis	F
A0939_1_1	Penicillidia dufourii	F	no	2017-09-09	Fall	Mandrata Peshtera	Cave	A0939	Myotis myotis	F
A0940_1_1	Nycteribia pedicularia	F	no	2017-09-09	Fall	Mandrata Peshtera	Cave	A0940	Myotis capaccinii	F
A0940_1_2	Nycteribia pedicularia	F	no	2017-09-09	Fall	Mandrata Peshtera	Cave	A0940	Myotis capaccinii	F
A0940_1_3	Nycteribia pedicularia	F	no	2017-09-09	Fall	Mandrata Peshtera	Cave	A0940	Myotis capaccinii	F
A0940_1_4	Nycteribia pedicularia	F	no	2017-09-09	Fall	Mandrata Peshtera	Cave	A0940	Myotis capaccinii	F
A0940_1_5	Nycteribia pedicularia	F	no	2017-09-09	Fall	Mandrata Peshtera	Cave	A0940	Myotis capaccinii	F
A0940_1_6	Nycteribia pedicularia	F	no	2017-09-09	Fall	Mandrata Peshtera	Cave	A0940	Myotis capaccinii	F
A0940_2_1	Nycteribia pedicularia	M	no	2017-09-09	Fall	Mandrata Peshtera	Cave	A0940	Myotis capaccinii	F
A0942_1_1	Penicillidia dufourii	M	no	2017-09-09	Fall	Mandrata Peshtera	Cave	A0942	Myotis blythii	M
A0943_1_1	Penicillidia dufourii	F	no	2017-09-09	Fall	Mandrata Peshtera	Cave	A0943	Myotis myotis	F
A0944_1_1	Nycteribia pedicularia	M	no	2017-09-09	Fall	Mandrata Peshtera	Cave	A0944	Myotis capaccinii	F
A0944_1_2	Nycteribia pedicularia	M	no	2017-09-09	Fall	Mandrata Peshtera	Cave	A0944	Myotis capaccinii	F
A0944_1_3	Nycteribia pedicularia	M	no	2017-09-09	Fall	Mandrata Peshtera	Cave	A0944	Myotis capaccinii	F
A0944_2_1	Nycteribia pedicularia	F	no	2017-09-09	Fall	Mandrata Peshtera	Cave	A0944	Myotis capaccinii	F
A0944_2_2	Nycteribia pedicularia	F	no	2017-09-09	Fall	Mandrata Peshtera	Cave	A0944	Myotis capaccinii	F
A0944_2_3	Nycteribia pedicularia	F	no	2017-09-09	Fall	Mandrata Peshtera	Cave	A0944	Myotis capaccinii	F
A0944_2_4	Nycteribia pedicularia	F	no	2017-09-09	Fall	Mandrata Peshtera	Cave	A0944	Myotis capaccinii	F
A0948_1_1	Phthiridium biarticulatum	M	no	2017-09-09	Fall	Mandrata Peshtera	Cave	A0948	Rhinolophus euryale	M
A0951_1_1	Nycteribia pedicularia	M	no	2017-09-09	Fall	Mandrata Peshtera	Cave	A0951	Myotis capaccinii	M
A0951_1_2	Nycteribia pedicularia	M	no	2017-09-09	Fall	Mandrata Peshtera	Cave	A0951	Myotis capaccinii	M
A0951_1_3	Nycteribia pedicularia	M	no	2017-09-09	Fall	Mandrata Peshtera	Cave	A0951	Myotis capaccinii	M
A0951_1_4	Nycteribia pedicularia	M	no	2017-09-09	Fall	Mandrata Peshtera	Cave	A0951	Myotis capaccinii	M
A0951_1_5	Nycteribia pedicularia	M	no	2017-09-09	Fall	Mandrata Peshtera	Cave	A0951	Myotis capaccinii	M
A0951_2_1	Nycteribia pedicularia	F	no	2017-09-09	Fall	Mandrata Peshtera	Cave	A0951	Myotis capaccinii	M
A0951_2_2	Nycteribia pedicularia	F	no	2017-09-09	Fall	Mandrata Peshtera	Cave	A0951	Myotis capaccinii	M
A0951_2_3	Nycteribia pedicularia	F	no	2017-09-09	Fall	Mandrata Peshtera	Cave	A0951	Myotis capaccinii	M
A0954_1_1	Penicillidia dufourii	F	no	2017-09-09	Fall	Mandrata Peshtera	Cave	A0954	Myotis blythii	M
A0954_1_2	Penicillidia dufourii	F	no	2017-09-09	Fall	Mandrata Peshtera	Cave	A0954	Myotis blythii	M
A0956_1_1	Penicillidia dufourii	F	no	2017-09-09	Fall	Mandrata Peshtera	Cave	A0956	Myotis blythii	F
A0959_1_1	Penicillidia dufourii	F	no	2017-09-09	Fall	Mandrata Peshtera	Cave	A0959	Myotis blythii	F
A0959_1_2	Penicillidia dufourii	F	no	2017-09-09	Fall	Mandrata Peshtera	Cave	A0959	Myotis blythii	F
A0960_1_1	Phthiridium biarticulatum	M	no	2017-09-09	Fall	Mandrata Peshtera	Cave	A0960	Rhinolophus ferrumequinum	F
A0961_1_1	Penicillidia conspicua	M	no	2017-09-09	Fall	Mandrata Peshtera	Cave	A0961	Miniopterus schreibersii	M
A0962_1_1	Phthiridium biarticulatum	F	no	2017-09-09	Fall	Mandrata Peshtera	Cave	A0962	Rhinolophus euryale	M
A0963_1_1	Penicillidia dufourii	F	no	2017-09-09	Fall	Mandrata Peshtera	Cave	A0963	Myotis blythii	M
A0965_1_1	Penicillidia dufourii	M	no	2017-09-09	Fall	Mandrata Peshtera	Cave	A0965	Myotis blythii	M
A0969_1_1	Nycteribia pedicularia	F	no	2017-09-09	Fall	Mandrata Peshtera	Cave	A0969	Rhinolophus ferrumequinum	M
A0970_1_1	Penicillidia conspicua	M	no	2017-09-09	Fall	Mandrata Peshtera	Cave	A0970	Miniopterus schreibersii	M
A0970_1_2	Penicillidia conspicua	M	no	2017-09-09	Fall	Mandrata Peshtera	Cave	A0970	Miniopterus schreibersii	M
A0972_1_1	Penicillidia conspicua	M	no	2017-09-09	Fall	Mandrata Peshtera	Cave	A0972	Miniopterus schreibersii	M
A0972_2_1	Penicillidia conspicua	F	yes	2017-09-09	Fall	Mandrata Peshtera	Cave	A0972	Miniopterus schreibersii	M
A0973_1_1	Nycteribia pedicularia	M	no	2017-09-09	Fall	Mandrata Peshtera	Cave	A0973	Miniopterus schreibersii	M
A0974_1_1	Penicillidia conspicua	F	yes	2017-09-09	Fall	Mandrata Peshtera	Cave	A0974	Miniopterus schreibersii	M
A0976_1_1	Penicillidia conspicua	M	no	2017-09-09	Fall	Mandrata Peshtera	Cave	A0976	Miniopterus schreibersii	M
A0976_2_1	Penicillidia conspicua	F	yes	2017-09-09	Fall	Mandrata Peshtera	Cave	A0976	Miniopterus schreibersii	M
A0976_2_2	Penicillidia conspicua	F	no	2017-09-09	Fall	Mandrata Peshtera	Cave	A0976	Miniopterus schreibersii	M
A0976_2_3	Penicillidia conspicua	F	no	2017-09-09	Fall	Mandrata Peshtera	Cave	A0976	Miniopterus schreibersii	M
A0976_2_4	Penicillidia conspicua	F	no	2017-09-09	Fall	Mandrata Peshtera	Cave	A0976	Miniopterus schreibersii	M
A0978_1_1	Penicillidia conspicua	M	no	2017-09-09	Fall	Mandrata Peshtera	Cave	A0978	Miniopterus schreibersii	M
A0978_2_1	Nycteribia schmidlii	M	no	2017-09-09	Fall	Mandrata Peshtera	Cave	A0978	Miniopterus schreibersii	M
A0978_3_1	Penicillidia conspicua	F	no	2017-09-09	Fall	Mandrata Peshtera	Cave	A0978	Miniopterus schreibersii	M
A0978_4_1	Nycteribia schmidlii	F	no	2017-09-09	Fall	Mandrata Peshtera	Cave	A0978	Miniopterus schreibersii	M
A0985_1_1	Nycteribia schmidlii	M	no	2017-09-09	Fall	Mandrata Peshtera	Cave	A0985	Miniopterus schreibersii	F
A0985_2_1	Nycteribia schmidlii	F	no	2017-09-09	Fall	Mandrata Peshtera	Cave	A0985	Miniopterus schreibersii	F
A0986_1_1	Penicillidia conspicua	F	no	2017-09-09	Fall	Mandrata Peshtera	Cave	A0986	Miniopterus schreibersii	M
A0988_1_1	Penicillidia dufourii	M	no	2017-09-09	Fall	Mandrata Peshtera	Cave	A0988	Myotis blythii	F
A0988_1_2	Penicillidia dufourii	M	no	2017-09-09	Fall	Mandrata Peshtera	Cave	A0988	Myotis blythii	F
A0988_1_3	Penicillidia dufourii	M	no	2017-09-09	Fall	Mandrata Peshtera	Cave	A0988	Myotis blythii	F
A0988_2_1	Nycteribia vexata	F	no	2017-09-09	Fall	Mandrata Peshtera	Cave	A0988	Myotis blythii	F
A0989_1_1	Penicillidia dufourii	M	no	2017-09-09	Fall	Mandrata Peshtera	Cave	A0989	Myotis blythii	M
A0989_2_1	Penicillidia dufourii	F	no	2017-09-09	Fall	Mandrata Peshtera	Cave	A0989	Myotis blythii	M
A0990_1_1	Nycteribia latreilli	M	no	2017-09-09	Fall	Mandrata Peshtera	Cave	A0990	Myotis blythii	M
A0990_2_1	Penicillidia dufourii	F	no	2017-09-09	Fall	Mandrata Peshtera	Cave	A0990	Myotis blythii	M
A0991_1_1	Phthiridium biarticulatum	M	no	2017-09-09	Fall	Mandrata Peshtera	Cave	A0991	Rhinolophus euryale	F
A0994_1_1	Phthiridium biarticulatum	M	no	2017-09-09	Fall	Mandrata Peshtera	Cave	A0994	Rhinolophus euryale	F
A0994_2_1	Phthiridium biarticulatum	F	no	2017-09-09	Fall	Mandrata Peshtera	Cave	A0994	Rhinolophus euryale	F
A0996_1_1	Penicillidia dufourii	M	no	2017-09-09	Fall	Mandrata Peshtera	Cave	A0996	Myotis blythii	F
A0996_2_1	Nycteribia vexata	F	yes	2017-09-09	Fall	Mandrata Peshtera	Cave	A0996	Myotis blythii	F
A0997_1_1	Penicillidia dufourii	M	no	2017-09-09	Fall	Mandrata Peshtera	Cave	A0997	Myotis blythii	M
A0999_1_1	Nycteribia schmidlii	M	no	2017-09-09	Fall	Mandrata Peshtera	Cave	A0999	Miniopterus schreibersii	M
A1000_1_1	Penicillidia dufourii	F	no	2017-09-09	Fall	Mandrata Peshtera	Cave	A1000	Myotis blythii	F
A1002_1_1	Phthiridium biarticulatum	F	no	2017-09-09	Fall	Mandrata Peshtera	Cave	A1002	Rhinolophus euryale	F
A1002_1_2	Phthiridium biarticulatum	F	no	2017-09-09	Fall	Mandrata Peshtera	Cave	A1002	Rhinolophus euryale	F
A1003_1_1	Nycteribia vexata	F	yes	2017-09-09	Fall	Mandrata Peshtera	Cave	A1003	Myotis blythii	M
A1004_1_1	Phthiridium biarticulatum	M	no	2017-09-09	Fall	Mandrata Peshtera	Cave	A1004	Rhinolophus ferrumequinum	F
A1004_2_1	Phthiridium biarticulatum	F	no	2017-09-09	Fall	Mandrata Peshtera	Cave	A1004	Rhinolophus ferrumequinum	F
A1005_1_1	Phthiridium biarticulatum	M	no	2017-09-09	Fall	Mandrata Peshtera	Cave	A1005	Rhinolophus euryale	F
A1009_1_1	Phthiridium biarticulatum	F	no	2017-09-09	Fall	Mandrata Peshtera	Cave	A1009	Rhinolophus euryale	F
A1009_1_2	Phthiridium biarticulatum	F	no	2017-09-09	Fall	Mandrata Peshtera	Cave	A1009	Rhinolophus euryale	F
A1009_1_3	Phthiridium biarticulatum	F	no	2017-09-09	Fall	Mandrata Peshtera	Cave	A1009	Rhinolophus euryale	F
A1011_1_1	Phthiridium biarticulatum	M	no	2017-09-10	Fall	Nanin Kamak	Cave	A1011	Rhinolophus ferrumequinum	F
A1012_1_1	Phthiridium biarticulatum	M	no	2017-09-10	Fall	Nanin Kamak	Cave	A1012	Rhinolophus euryale	F
A1012_1_2	Phthiridium biarticulatum	M	no	2017-09-10	Fall	Nanin Kamak	Cave	A1012	Rhinolophus euryale	F
A1012_1_3	Phthiridium biarticulatum	M	no	2017-09-10	Fall	Nanin Kamak	Cave	A1012	Rhinolophus euryale	F
A1012_2_1	Phthiridium biarticulatum	F	no	2017-09-10	Fall	Nanin Kamak	Cave	A1012	Rhinolophus euryale	F
A1012_2_2	Phthiridium biarticulatum	F	no	2017-09-10	Fall	Nanin Kamak	Cave	A1012	Rhinolophus euryale	F
A1012_2_3	Phthiridium biarticulatum	F	no	2017-09-10	Fall	Nanin Kamak	Cave	A1012	Rhinolophus euryale	F
A1014_1_1	Phthiridium biarticulatum	M	no	2017-09-10	Fall	Nanin Kamak	Cave	A1014	Rhinolophus euryale	F
A1014_2_1	Phthiridium biarticulatum	F	no	2017-09-10	Fall	Nanin Kamak	Cave	A1014	Rhinolophus euryale	F
A1015_1_1	Phthiridium biarticulatum	M	no	2017-09-10	Fall	Nanin Kamak	Cave	A1015	Rhinolophus euryale	M
A1016_1_1	Nycteribia pedicularia	M	no	2017-09-10	Fall	Nanin Kamak	Cave	A1016	Myotis capaccinii	F
A1017_1_1	Nycteribia pedicularia	M	no	2017-09-10	Fall	Nanin Kamak	Cave	A1017	Myotis capaccinii	F
A1017_1_2	Nycteribia pedicularia	M	no	2017-09-10	Fall	Nanin Kamak	Cave	A1017	Myotis capaccinii	F
A1017_1_3	Nycteribia pedicularia	M	no	2017-09-10	Fall	Nanin Kamak	Cave	A1017	Myotis capaccinii	F
A1017_2_1	Penicillidia conspicua	F	no	2017-09-10	Fall	Nanin Kamak	Cave	A1017	Myotis capaccinii	F
A1018_1_1	Penicillidia conspicua	M	no	2017-09-10	Fall	Nanin Kamak	Cave	A1018	Myotis capaccinii	M
A1018_2_1	Nycteribia pedicularia	M	no	2017-09-10	Fall	Nanin Kamak	Cave	A1018	Myotis capaccinii	M
A1018_2_2	Nycteribia pedicularia	M	no	2017-09-10	Fall	Nanin Kamak	Cave	A1018	Myotis capaccinii	M
A1018_2_3	Nycteribia pedicularia	M	no	2017-09-10	Fall	Nanin Kamak	Cave	A1018	Myotis capaccinii	M
A1018_2_4	Nycteribia pedicularia	M	no	2017-09-10	Fall	Nanin Kamak	Cave	A1018	Myotis capaccinii	M
A1018_2_5	Nycteribia pedicularia	M	no	2017-09-10	Fall	Nanin Kamak	Cave	A1018	Myotis capaccinii	M
A1018_3_1	Nycteribia pedicularia	F	no	2017-09-10	Fall	Nanin Kamak	Cave	A1018	Myotis capaccinii	M
A1018_3_2	Nycteribia pedicularia	F	no	2017-09-10	Fall	Nanin Kamak	Cave	A1018	Myotis capaccinii	M
A1018_3_3	Nycteribia pedicularia	F	no	2017-09-10	Fall	Nanin Kamak	Cave	A1018	Myotis capaccinii	M
A1019_1_1	Nycteribia pedicularia	M	no	2017-09-10	Fall	Nanin Kamak	Cave	A1019	Myotis capaccinii	F
A1020_1_1	Penicillidia dufourii	M	no	2017-09-10	Fall	Nanin Kamak	Cave	A1020	Myotis capaccinii	M
A1022_1_1	Penicillidia dufourii	M	no	2017-09-10	Fall	Nanin Kamak	Cave	A1022	Myotis capaccinii	M
A1022_2_1	Nycteribia pedicularia	M	no	2017-09-10	Fall	Nanin Kamak	Cave	A1022	Myotis capaccinii	M
A1022_2_2	Nycteribia pedicularia	M	no	2017-09-10	Fall	Nanin Kamak	Cave	A1022	Myotis capaccinii	M
A1022_2_3	Nycteribia pedicularia	M	no	2017-09-10	Fall	Nanin Kamak	Cave	A1022	Myotis capaccinii	M
A1022_2_4	Nycteribia pedicularia	M	no	2017-09-10	Fall	Nanin Kamak	Cave	A1022	Myotis capaccinii	M
A1022_2_5	Nycteribia pedicularia	M	no	2017-09-10	Fall	Nanin Kamak	Cave	A1022	Myotis capaccinii	M
A1022_2_6	Nycteribia pedicularia	M	no	2017-09-10	Fall	Nanin Kamak	Cave	A1022	Myotis capaccinii	M
A1022_3_1	Nycteribia pedicularia	F	no	2017-09-10	Fall	Nanin Kamak	Cave	A1022	Myotis capaccinii	M
A1022_3_2	Nycteribia pedicularia	F	no	2017-09-10	Fall	Nanin Kamak	Cave	A1022	Myotis capaccinii	M
A1022_3_3	Nycteribia pedicularia	F	no	2017-09-10	Fall	Nanin Kamak	Cave	A1022	Myotis capaccinii	M
A1022_3_4	Nycteribia pedicularia	F	no	2017-09-10	Fall	Nanin Kamak	Cave	A1022	Myotis capaccinii	M
A1022_3_5	Nycteribia pedicularia	F	no	2017-09-10	Fall	Nanin Kamak	Cave	A1022	Myotis capaccinii	M
A1022_3_6	Nycteribia pedicularia	F	no	2017-09-10	Fall	Nanin Kamak	Cave	A1022	Myotis capaccinii	M
A1022_3_7	Nycteribia pedicularia	F	no	2017-09-10	Fall	Nanin Kamak	Cave	A1022	Myotis capaccinii	M
A1022_3_8	Nycteribia pedicularia	F	no	2017-09-10	Fall	Nanin Kamak	Cave	A1022	Myotis capaccinii	M
A1022_3_9	Nycteribia pedicularia	F	no	2017-09-10	Fall	Nanin Kamak	Cave	A1022	Myotis capaccinii	M
A1022_3_10	Nycteribia pedicularia	F	no	2017-09-10	Fall	Nanin Kamak	Cave	A1022	Myotis capaccinii	M
A1022_3_11	Nycteribia pedicularia	F	no	2017-09-10	Fall	Nanin Kamak	Cave	A1022	Myotis capaccinii	M
A1023_1_1	Nycteribia pedicularia	M	no	2017-09-10	Fall	Nanin Kamak	Cave	A1023	Myotis capaccinii	M
A1023_1_2	Nycteribia pedicularia	M	no	2017-09-10	Fall	Nanin Kamak	Cave	A1023	Myotis capaccinii	M
A1023_1_3	Nycteribia pedicularia	M	no	2017-09-10	Fall	Nanin Kamak	Cave	A1023	Myotis capaccinii	M
A1023_1_4	Nycteribia pedicularia	M	no	2017-09-10	Fall	Nanin Kamak	Cave	A1023	Myotis capaccinii	M
A1023_1_5	Nycteribia pedicularia	M	no	2017-09-10	Fall	Nanin Kamak	Cave	A1023	Myotis capaccinii	M
A1023_2_1	Nycteribia pedicularia	F	no	2017-09-10	Fall	Nanin Kamak	Cave	A1023	Myotis capaccinii	M
A1023_2_2	Nycteribia pedicularia	F	no	2017-09-10	Fall	Nanin Kamak	Cave	A1023	Myotis capaccinii	M
A1023_2_3	Nycteribia pedicularia	F	no	2017-09-10	Fall	Nanin Kamak	Cave	A1023	Myotis capaccinii	M
A1023_2_4	Nycteribia pedicularia	F	no	2017-09-10	Fall	Nanin Kamak	Cave	A1023	Myotis capaccinii	M
A1023_2_5	Nycteribia pedicularia	F	no	2017-09-10	Fall	Nanin Kamak	Cave	A1023	Myotis capaccinii	M
A1023_2_6	Nycteribia pedicularia	F	no	2017-09-10	Fall	Nanin Kamak	Cave	A1023	Myotis capaccinii	M
A1023_2_7	Nycteribia pedicularia	F	no	2017-09-10	Fall	Nanin Kamak	Cave	A1023	Myotis capaccinii	M
A1023_2_8	Nycteribia pedicularia	F	no	2017-09-10	Fall	Nanin Kamak	Cave	A1023	Myotis capaccinii	M
A1023_2_9	Nycteribia pedicularia	F	no	2017-09-10	Fall	Nanin Kamak	Cave	A1023	Myotis capaccinii	M
A1024_1_1	Nycteribia pedicularia	M	no	2017-09-10	Fall	Nanin Kamak	Cave	A1024	Myotis capaccinii	M
A1024_1_2	Nycteribia pedicularia	M	no	2017-09-10	Fall	Nanin Kamak	Cave	A1024	Myotis capaccinii	M
A1024_1_3	Nycteribia pedicularia	M	no	2017-09-10	Fall	Nanin Kamak	Cave	A1024	Myotis capaccinii	M
A1024_1_4	Nycteribia pedicularia	M	no	2017-09-10	Fall	Nanin Kamak	Cave	A1024	Myotis capaccinii	M
A1024_1_5	Nycteribia pedicularia	M	no	2017-09-10	Fall	Nanin Kamak	Cave	A1024	Myotis capaccinii	M
A1024_1_6	Nycteribia pedicularia	M	no	2017-09-10	Fall	Nanin Kamak	Cave	A1024	Myotis capaccinii	M
A1025_1_1	Nycteribia pedicularia	M	no	2017-09-10	Fall	Nanin Kamak	Cave	A1025	Myotis capaccinii	F
A1025_1_2	Nycteribia pedicularia	M	no	2017-09-10	Fall	Nanin Kamak	Cave	A1025	Myotis capaccinii	F
A1025_1_3	Nycteribia pedicularia	M	no	2017-09-10	Fall	Nanin Kamak	Cave	A1025	Myotis capaccinii	F
A1025_2_1	Nycteribia pedicularia	F	no	2017-09-10	Fall	Nanin Kamak	Cave	A1025	Myotis capaccinii	F
A1025_2_2	Nycteribia pedicularia	F	no	2017-09-10	Fall	Nanin Kamak	Cave	A1025	Myotis capaccinii	F
A1026_1_1	Penicillidia dufourii	M	no	2017-09-10	Fall	Nanin Kamak	Cave	A1026	Myotis capaccinii	M
A1026_2_1	Nycteribia pedicularia	M	no	2017-09-10	Fall	Nanin Kamak	Cave	A1026	Myotis capaccinii	M
A1026_3_1	Nycteribia pedicularia	F	no	2017-09-10	Fall	Nanin Kamak	Cave	A1026	Myotis capaccinii	M
A1026_3_2	Nycteribia pedicularia	F	no	2017-09-10	Fall	Nanin Kamak	Cave	A1026	Myotis capaccinii	M
A1027_1_1	Nycteribia pedicularia	M	no	2017-09-10	Fall	Nanin Kamak	Cave	A1027	Myotis capaccinii	F
A1027_1_2	Nycteribia pedicularia	M	no	2017-09-10	Fall	Nanin Kamak	Cave	A1027	Myotis capaccinii	F
A1027_1_3	Nycteribia pedicularia	M	no	2017-09-10	Fall	Nanin Kamak	Cave	A1027	Myotis capaccinii	F
A1027_1_4	Nycteribia pedicularia	M	no	2017-09-10	Fall	Nanin Kamak	Cave	A1027	Myotis capaccinii	F
A1027_2_1	Nycteribia pedicularia	F	no	2017-09-10	Fall	Nanin Kamak	Cave	A1027	Myotis capaccinii	F
A1027_2_2	Nycteribia pedicularia	F	no	2017-09-10	Fall	Nanin Kamak	Cave	A1027	Myotis capaccinii	F
A1027_2_3	Nycteribia pedicularia	F	no	2017-09-10	Fall	Nanin Kamak	Cave	A1027	Myotis capaccinii	F
A1027_2_4	Nycteribia pedicularia	F	no	2017-09-10	Fall	Nanin Kamak	Cave	A1027	Myotis capaccinii	F
A1027_2_5	Nycteribia pedicularia	F	no	2017-09-10	Fall	Nanin Kamak	Cave	A1027	Myotis capaccinii	F
A1027_2_6	Nycteribia pedicularia	F	no	2017-09-10	Fall	Nanin Kamak	Cave	A1027	Myotis capaccinii	F
A1028_1_1	Nycteribia pedicularia	M	no	2017-09-10	Fall	Nanin Kamak	Cave	A1028	Myotis capaccinii	M
A1028_2_1	Penicillidia dufourii	F	no	2017-09-10	Fall	Nanin Kamak	Cave	A1028	Myotis capaccinii	M
A1028_3_1	Nycteribia pedicularia	F	no	2017-09-10	Fall	Nanin Kamak	Cave	A1028	Myotis capaccinii	M
A1028_3_2	Nycteribia pedicularia	F	no	2017-09-10	Fall	Nanin Kamak	Cave	A1028	Myotis capaccinii	M
A1028_3_3	Nycteribia pedicularia	F	no	2017-09-10	Fall	Nanin Kamak	Cave	A1028	Myotis capaccinii	M
A1029_1_1	Nycteribia pedicularia	M	no	2017-09-10	Fall	Nanin Kamak	Cave	A1029	Myotis capaccinii	M
A1030_1_1	Nycteribia pedicularia	M	no	2017-09-10	Fall	Nanin Kamak	Cave	A1030	Myotis capaccinii	M
A1030_1_2	Nycteribia pedicularia	M	no	2017-09-10	Fall	Nanin Kamak	Cave	A1030	Myotis capaccinii	M
A1030_1_3	Nycteribia pedicularia	M	no	2017-09-10	Fall	Nanin Kamak	Cave	A1030	Myotis capaccinii	M
A1030_1_4	Nycteribia pedicularia	M	no	2017-09-10	Fall	Nanin Kamak	Cave	A1030	Myotis capaccinii	M
A1030_2_1	Nycteribia pedicularia	F	no	2017-09-10	Fall	Nanin Kamak	Cave	A1030	Myotis capaccinii	M
A1030_2_2	Nycteribia pedicularia	F	no	2017-09-10	Fall	Nanin Kamak	Cave	A1030	Myotis capaccinii	M
A1030_2_3	Nycteribia pedicularia	F	no	2017-09-10	Fall	Nanin Kamak	Cave	A1030	Myotis capaccinii	M
A1030_2_4	Nycteribia pedicularia	F	no	2017-09-10	Fall	Nanin Kamak	Cave	A1030	Myotis capaccinii	M
A1031_1_1	Nycteribia pedicularia	M	no	2017-09-10	Fall	Nanin Kamak	Cave	A1031	Myotis capaccinii	M
A1031_1_2	Nycteribia pedicularia	M	no	2017-09-10	Fall	Nanin Kamak	Cave	A1031	Myotis capaccinii	M
A1031_2_1	Nycteribia pedicularia	F	no	2017-09-10	Fall	Nanin Kamak	Cave	A1031	Myotis capaccinii	M
A1032_1_1	Penicillidia conspicua	M	yes	2017-09-10	Fall	Nanin Kamak	Cave	A1032	Myotis capaccinii	M
A1032_2_1	Nycteribia pedicularia	M	no	2017-09-10	Fall	Nanin Kamak	Cave	A1032	Myotis capaccinii	M
A1032_2_2	Nycteribia pedicularia	M	no	2017-09-10	Fall	Nanin Kamak	Cave	A1032	Myotis capaccinii	M
A1032_3_1	Nycteribia pedicularia	F	no	2017-09-10	Fall	Nanin Kamak	Cave	A1032	Myotis capaccinii	M
A1040_1_1	Penicillidia dufourii	M	no	2017-09-11	Fall	Orlova Chuka	Cave	A1040	Myotis capaccinii	F
A1040_2_1	Nycteribia pedicularia	M	no	2017-09-11	Fall	Orlova Chuka	Cave	A1040	Myotis capaccinii	F
A1040_2_2	Nycteribia pedicularia	M	no	2017-09-11	Fall	Orlova Chuka	Cave	A1040	Myotis capaccinii	F
A1040_3_1	Nycteribia pedicularia	F	no	2017-09-11	Fall	Orlova Chuka	Cave	A1040	Myotis capaccinii	F
A1040_3_2	Nycteribia pedicularia	F	no	2017-09-11	Fall	Orlova Chuka	Cave	A1040	Myotis capaccinii	F
A1040_3_3	Nycteribia pedicularia	F	no	2017-09-11	Fall	Orlova Chuka	Cave	A1040	Myotis capaccinii	F
A1040_3_4	Nycteribia pedicularia	F	no	2017-09-11	Fall	Orlova Chuka	Cave	A1040	Myotis capaccinii	F
A1040_3_5	Nycteribia pedicularia	F	no	2017-09-11	Fall	Orlova Chuka	Cave	A1040	Myotis capaccinii	F
A1041_1_1	Phthiridium biarticulatum	M	no	2017-09-11	Fall	Orlova Chuka	Cave	A1041	Rhinolophus euryale	M
A1041_2_1	Phthiridium biarticulatum	F	no	2017-09-11	Fall	Orlova Chuka	Cave	A1041	Rhinolophus euryale	M
A1042_1_1	Phthiridium biarticulatum	M	no	2017-09-11	Fall	Orlova Chuka	Cave	A1042	Rhinolophus euryale	M
A1042_1_2	Phthiridium biarticulatum	M	no	2017-09-11	Fall	Orlova Chuka	Cave	A1042	Rhinolophus euryale	M
A1042_1_3	Phthiridium biarticulatum	M	no	2017-09-11	Fall	Orlova Chuka	Cave	A1042	Rhinolophus euryale	M
A1042_2_1	Phthiridium biarticulatum	F	no	2017-09-11	Fall	Orlova Chuka	Cave	A1042	Rhinolophus euryale	M
A1042_2_2	Phthiridium biarticulatum	F	no	2017-09-11	Fall	Orlova Chuka	Cave	A1042	Rhinolophus euryale	M
A1042_2_3	Phthiridium biarticulatum	F	no	2017-09-11	Fall	Orlova Chuka	Cave	A1042	Rhinolophus euryale	M
A1042_2_4	Phthiridium biarticulatum	F	no	2017-09-11	Fall	Orlova Chuka	Cave	A1042	Rhinolophus euryale	M
A1042_2_5	Phthiridium biarticulatum	F	no	2017-09-11	Fall	Orlova Chuka	Cave	A1042	Rhinolophus euryale	M
A1042_2_6	Phthiridium biarticulatum	F	no	2017-09-11	Fall	Orlova Chuka	Cave	A1042	Rhinolophus euryale	M
A1042_2_7	Phthiridium biarticulatum	F	no	2017-09-11	Fall	Orlova Chuka	Cave	A1042	Rhinolophus euryale	M
A1044_1_1	Nycteribia vexata	M	no	2017-09-11	Fall	Orlova Chuka	Cave	A1044	Myotis myotis	F
A1047_1_1	Nycteribia vexata	M	no	2017-09-11	Fall	Orlova Chuka	Cave	A1047	Myotis myotis	F
A1048_1_1	Phthiridium biarticulatum	M	no	2017-09-11	Fall	Orlova Chuka	Cave	A1048	Rhinolophus euryale	M
A1048_1_2	Phthiridium biarticulatum	M	no	2017-09-11	Fall	Orlova Chuka	Cave	A1048	Rhinolophus euryale	M
A1048_1_3	Phthiridium biarticulatum	M	no	2017-09-11	Fall	Orlova Chuka	Cave	A1048	Rhinolophus euryale	M
A1048_1_4	Phthiridium biarticulatum	M	no	2017-09-11	Fall	Orlova Chuka	Cave	A1048	Rhinolophus euryale	M
A1049_1_1	Phthiridium biarticulatum	M	no	2017-09-11	Fall	Orlova Chuka	Cave	A1049	Rhinolophus euryale	F
A1049_2_1	Phthiridium biarticulatum	F	no	2017-09-11	Fall	Orlova Chuka	Cave	A1049	Rhinolophus euryale	F
A1050_1_1	Phthiridium biarticulatum	M	no	2017-09-11	Fall	Orlova Chuka	Cave	A1050	Rhinolophus mehelyi	M
A1050_2_1	Phthiridium biarticulatum	F	no	2017-09-11	Fall	Orlova Chuka	Cave	A1050	Rhinolophus mehelyi	M
A1051_1_1	Phthiridium biarticulatum	M	no	2017-09-11	Fall	Orlova Chuka	Cave	A1051	Rhinolophus euryale	M
A1052_1_1	Phthiridium biarticulatum	F	no	2017-09-11	Fall	Orlova Chuka	Cave	A1052	Rhinolophus euryale	F
A1052_1_2	Phthiridium biarticulatum	F	no	2017-09-11	Fall	Orlova Chuka	Cave	A1052	Rhinolophus euryale	F
A1052_1_3	Phthiridium biarticulatum	F	no	2017-09-11	Fall	Orlova Chuka	Cave	A1052	Rhinolophus euryale	F
A1052_1_4	Phthiridium biarticulatum	F	no	2017-09-11	Fall	Orlova Chuka	Cave	A1052	Rhinolophus euryale	F
A1052_1_5	Phthiridium biarticulatum	F	no	2017-09-11	Fall	Orlova Chuka	Cave	A1052	Rhinolophus euryale	F
A1055_1_1	Phthiridium biarticulatum	M	no	2017-09-11	Fall	Orlova Chuka	Cave	A1055	Rhinolophus euryale	M
A1057_1_1	Nycteribia kolenatii	M	no	2017-09-11	Fall	Orlova Chuka	Cave	A1057	Myotis daubentonii	F
A1057_1_2	Nycteribia kolenatii	M	no	2017-09-11	Fall	Orlova Chuka	Cave	A1057	Myotis daubentonii	F
A1057_2_1	Nycteribia kolenatii	F	no	2017-09-11	Fall	Orlova Chuka	Cave	A1057	Myotis daubentonii	F
A1057_2_2	Nycteribia kolenatii	F	no	2017-09-11	Fall	Orlova Chuka	Cave	A1057	Myotis daubentonii	F
A1058_1_1	Penicillidia dufourii	M	no	2017-09-11	Fall	Orlova Chuka	Cave	A1058	Myotis myotis	F
A1060_1_1	Phthiridium biarticulatum	M	no	2017-09-11	Fall	Orlova Chuka	Cave	A1060	Rhinolophus mehelyi	F
A1061_1_1	Nycteribia pedicularia	M	no	2017-09-11	Fall	Orlova Chuka	Cave	A1061	Myotis capaccinii	M
A1061_1_2	Nycteribia pedicularia	M	no	2017-09-11	Fall	Orlova Chuka	Cave	A1061	Myotis capaccinii	M
A1061_1_3	Nycteribia pedicularia	M	no	2017-09-11	Fall	Orlova Chuka	Cave	A1061	Myotis capaccinii	M
A1061_2_1	Nycteribia pedicularia	F	no	2017-09-11	Fall	Orlova Chuka	Cave	A1061	Myotis capaccinii	M
A1061_2_2	Nycteribia pedicularia	F	no	2017-09-11	Fall	Orlova Chuka	Cave	A1061	Myotis capaccinii	M
A1061_2_3	Nycteribia pedicularia	F	no	2017-09-11	Fall	Orlova Chuka	Cave	A1061	Myotis capaccinii	M
A1061_2_4	Nycteribia pedicularia	F	no	2017-09-11	Fall	Orlova Chuka	Cave	A1061	Myotis capaccinii	M
A1061_2_5	Nycteribia pedicularia	F	no	2017-09-11	Fall	Orlova Chuka	Cave	A1061	Myotis capaccinii	M
A1062_1_1	Phthiridium biarticulatum	M	no	2017-09-11	Fall	Orlova Chuka	Cave	A1062	Rhinolophus euryale	F
A1062_2_1	Phthiridium biarticulatum	F	no	2017-09-11	Fall	Orlova Chuka	Cave	A1062	Rhinolophus euryale	F
A1062_2_2	Phthiridium biarticulatum	F	no	2017-09-11	Fall	Orlova Chuka	Cave	A1062	Rhinolophus euryale	F
A1062_2_3	Phthiridium biarticulatum	F	no	2017-09-11	Fall	Orlova Chuka	Cave	A1062	Rhinolophus euryale	F
A1062_2_4	Phthiridium biarticulatum	F	no	2017-09-11	Fall	Orlova Chuka	Cave	A1062	Rhinolophus euryale	F
A1062_2_5	Phthiridium biarticulatum	F	no	2017-09-11	Fall	Orlova Chuka	Cave	A1062	Rhinolophus euryale	F
A1062_2_6	Phthiridium biarticulatum	F	no	2017-09-11	Fall	Orlova Chuka	Cave	A1062	Rhinolophus euryale	F
A1062_2_7	Phthiridium biarticulatum	F	no	2017-09-11	Fall	Orlova Chuka	Cave	A1062	Rhinolophus euryale	F
A1062_2_8	Phthiridium biarticulatum	F	no	2017-09-11	Fall	Orlova Chuka	Cave	A1062	Rhinolophus euryale	F
A1062_2_9	Phthiridium biarticulatum	F	no	2017-09-11	Fall	Orlova Chuka	Cave	A1062	Rhinolophus euryale	F
A1062_2_10	Phthiridium biarticulatum	F	no	2017-09-11	Fall	Orlova Chuka	Cave	A1062	Rhinolophus euryale	F
A1063_1_1	Phthiridium biarticulatum	M	no	2017-09-11	Fall	Orlova Chuka	Cave	A1063	Rhinolophus euryale	F
A1063_1_2	Phthiridium biarticulatum	M	no	2017-09-11	Fall	Orlova Chuka	Cave	A1063	Rhinolophus euryale	F
A1063_2_1	Phthiridium biarticulatum	F	no	2017-09-11	Fall	Orlova Chuka	Cave	A1063	Rhinolophus euryale	F
A1065_1_1	Phthiridium biarticulatum	F	no	2017-09-11	Fall	Orlova Chuka	Cave	A1065	Rhinolophus euryale	M
A1066_1_1	Phthiridium biarticulatum	M	no	2017-09-11	Fall	Orlova Chuka	Cave	A1066	Rhinolophus euryale	F
A1066_1_2	Phthiridium biarticulatum	M	no	2017-09-11	Fall	Orlova Chuka	Cave	A1066	Rhinolophus euryale	F
A1066_2_1	Phthiridium biarticulatum	F	no	2017-09-11	Fall	Orlova Chuka	Cave	A1066	Rhinolophus euryale	F
A1067_1_1	Nycteribia pedicularia	M	no	2017-09-11	Fall	Orlova Chuka	Cave	A1067	Myotis capaccinii	F
A1067_2_1	Nycteribia pedicularia	F	no	2017-09-11	Fall	Orlova Chuka	Cave	A1067	Myotis capaccinii	F
A1067_2_2	Nycteribia pedicularia	F	no	2017-09-11	Fall	Orlova Chuka	Cave	A1067	Myotis capaccinii	F
A1068_1_1	Phthiridium biarticulatum	M	no	2017-09-11	Fall	Orlova Chuka	Cave	A1068	Rhinolophus euryale	F
A1068_1_2	Phthiridium biarticulatum	M	no	2017-09-11	Fall	Orlova Chuka	Cave	A1068	Rhinolophus euryale	F
A1068_1_3	Phthiridium biarticulatum	M	no	2017-09-11	Fall	Orlova Chuka	Cave	A1068	Rhinolophus euryale	F
A1068_2_1	Phthiridium biarticulatum	F	no	2017-09-11	Fall	Orlova Chuka	Cave	A1068	Rhinolophus euryale	F
A1068_2_2	Phthiridium biarticulatum	F	no	2017-09-11	Fall	Orlova Chuka	Cave	A1068	Rhinolophus euryale	F
A1068_2_3	Phthiridium biarticulatum	F	no	2017-09-11	Fall	Orlova Chuka	Cave	A1068	Rhinolophus euryale	F
A1068_2_4	Phthiridium biarticulatum	F	no	2017-09-11	Fall	Orlova Chuka	Cave	A1068	Rhinolophus euryale	F
A1068_2_5	Phthiridium biarticulatum	F	no	2017-09-11	Fall	Orlova Chuka	Cave	A1068	Rhinolophus euryale	F
A1068_2_6	Phthiridium biarticulatum	F	no	2017-09-11	Fall	Orlova Chuka	Cave	A1068	Rhinolophus euryale	F
A1068_2_7	Phthiridium biarticulatum	F	no	2017-09-11	Fall	Orlova Chuka	Cave	A1068	Rhinolophus euryale	F
A1068_2_8	Phthiridium biarticulatum	F	no	2017-09-11	Fall	Orlova Chuka	Cave	A1068	Rhinolophus euryale	F
A1069_1_1	Penicillidia dufourii	M	no	2017-09-11	Fall	Orlova Chuka	Cave	A1069	Myotis capaccinii	M
A1069_2_1	Nycteribia pedicularia	M	no	2017-09-11	Fall	Orlova Chuka	Cave	A1069	Myotis capaccinii	M
A1069_2_2	Nycteribia pedicularia	M	no	2017-09-11	Fall	Orlova Chuka	Cave	A1069	Myotis capaccinii	M
A1069_3_1	Nycteribia pedicularia	F	yes	2017-09-11	Fall	Orlova Chuka	Cave	A1069	Myotis capaccinii	M
A1069_3_2	Nycteribia pedicularia	F	no	2017-09-11	Fall	Orlova Chuka	Cave	A1069	Myotis capaccinii	M
A1069_3_3	Nycteribia pedicularia	F	no	2017-09-11	Fall	Orlova Chuka	Cave	A1069	Myotis capaccinii	M
A1069_3_4	Nycteribia pedicularia	F	no	2017-09-11	Fall	Orlova Chuka	Cave	A1069	Myotis capaccinii	M
A1069_3_5	Nycteribia pedicularia	F	no	2017-09-11	Fall	Orlova Chuka	Cave	A1069	Myotis capaccinii	M
A1071_1_1	Phthiridium biarticulatum	M	no	2017-09-11	Fall	Orlova Chuka	Cave	A1071	Rhinolophus euryale	F
A1071_1_2	Phthiridium biarticulatum	M	no	2017-09-11	Fall	Orlova Chuka	Cave	A1071	Rhinolophus euryale	F
A1071_2_1	Phthiridium biarticulatum	F	yes	2017-09-11	Fall	Orlova Chuka	Cave	A1071	Rhinolophus euryale	F
A1072_1_1	Penicillidia dufourii	F	no	2017-09-11	Fall	Orlova Chuka	Cave	A1072	Myotis myotis	F
A1073_1_1	Phthiridium biarticulatum	M	no	2017-09-11	Fall	Orlova Chuka	Cave	A1073	Rhinolophus euryale	F
A1073_1_2	Phthiridium biarticulatum	M	no	2017-09-11	Fall	Orlova Chuka	Cave	A1073	Rhinolophus euryale	F
A1073_1_3	Phthiridium biarticulatum	M	no	2017-09-11	Fall	Orlova Chuka	Cave	A1073	Rhinolophus euryale	F
A1073_1_4	Phthiridium biarticulatum	M	no	2017-09-11	Fall	Orlova Chuka	Cave	A1073	Rhinolophus euryale	F
A1073_2_1	Phthiridium biarticulatum	F	yes	2017-09-11	Fall	Orlova Chuka	Cave	A1073	Rhinolophus euryale	F
A1073_2_2	Phthiridium biarticulatum	F	no	2017-09-11	Fall	Orlova Chuka	Cave	A1073	Rhinolophus euryale	F
A1074_1_1	Phthiridium biarticulatum	F	no	2017-09-11	Fall	Orlova Chuka	Cave	A1074	Rhinolophus mehelyi	F
A1077_1_1	Penicillidia dufourii	M	no	2017-09-11	Fall	Orlova Chuka	Cave	A1077	Myotis myotis	M
A1078_1_1	Nycteribia kolenatii	F	no	2017-09-11	Fall	Orlova Chuka	Cave	A1078	Myotis daubentonii	M
A1079_1_1	Nycteribia kolenatii	M	no	2017-09-11	Fall	Orlova Chuka	Cave	A1079	Myotis daubentonii	M
A1079_2_1	Nycteribia kolenatii	F	no	2017-09-11	Fall	Orlova Chuka	Cave	A1079	Myotis daubentonii	M
A1079_2_2	Nycteribia kolenatii	F	no	2017-09-11	Fall	Orlova Chuka	Cave	A1079	Myotis daubentonii	M
A1083_1_1	Phthiridium biarticulatum	M	no	2017-09-11	Fall	Orlova Chuka	Cave	A1083	Rhinolophus mehelyi	M
A1083_1_2	Phthiridium biarticulatum	M	no	2017-09-11	Fall	Orlova Chuka	Cave	A1083	Rhinolophus mehelyi	M
A1084_1_1	Phthiridium biarticulatum	M	no	2017-09-11	Fall	Orlova Chuka	Cave	A1084	Rhinolophus euryale	M
A1084_2_1	Phthiridium biarticulatum	F	no	2017-09-11	Fall	Orlova Chuka	Cave	A1084	Rhinolophus euryale	M
A1085_1_1	Phthiridium biarticulatum	M	no	2017-09-11	Fall	Orlova Chuka	Cave	A1085	Rhinolophus euryale	F
A1086_1_1	Phthiridium biarticulatum	M	no	2017-09-11	Fall	Orlova Chuka	Cave	A1086	Rhinolophus euryale	M
A1086_2_1	Phthiridium biarticulatum	F	no	2017-09-11	Fall	Orlova Chuka	Cave	A1086	Rhinolophus euryale	M
A1086_2_2	Phthiridium biarticulatum	F	no	2017-09-11	Fall	Orlova Chuka	Cave	A1086	Rhinolophus euryale	M
A1088_1_1	Phthiridium biarticulatum	M	no	2017-09-11	Fall	Orlova Chuka	Cave	A1088	Rhinolophus mehelyi	F
A1088_2_1	Phthiridium biarticulatum	F	no	2017-09-11	Fall	Orlova Chuka	Cave	A1088	Rhinolophus mehelyi	F
A1090_1_1	Penicillidia dufourii	M	no	2017-09-11	Fall	Orlova Chuka	Cave	A1090	Myotis daubentonii	M
A1091_1_1	Phthiridium biarticulatum	M	no	2017-09-11	Fall	Orlova Chuka	Cave	A1091	Rhinolophus euryale	F
A1091_2_1	Phthiridium biarticulatum	F	no	2017-09-11	Fall	Orlova Chuka	Cave	A1091	Rhinolophus euryale	F
A1092_1_1	Phthiridium biarticulatum	F	no	2017-09-11	Fall	Orlova Chuka	Cave	A1092	Rhinolophus mehelyi	M
A1093_1_1	Phthiridium biarticulatum	M	no	2017-09-11	Fall	Orlova Chuka	Cave	A1093	Rhinolophus euryale	M
A1093_1_2	Phthiridium biarticulatum	M	no	2017-09-11	Fall	Orlova Chuka	Cave	A1093	Rhinolophus euryale	M
A1093_1_3	Phthiridium biarticulatum	M	no	2017-09-11	Fall	Orlova Chuka	Cave	A1093	Rhinolophus euryale	M
A1095_1_1	Nycteribia pedicularia	M	no	2017-09-11	Fall	Orlova Chuka	Cave	A1095	Myotis capaccinii	F
A1095_1_2	Nycteribia pedicularia	M	no	2017-09-11	Fall	Orlova Chuka	Cave	A1095	Myotis capaccinii	F
A1095_2_1	Nycteribia pedicularia	F	no	2017-09-11	Fall	Orlova Chuka	Cave	A1095	Myotis capaccinii	F
A1095_3_1	Penicillidia dufourii	F	no	2017-09-11	Fall	Orlova Chuka	Cave	A1095	Myotis capaccinii	F
A1097_1_1	Nycteribia vexata	M	no	2017-09-11	Fall	Orlova Chuka	Cave	A1097	Myotis blythii	F
A1098_1_1	Nycteribia pedicularia	F	no	2017-09-11	Fall	Orlova Chuka	Cave	A1098	Myotis capaccinii	M
A1099_1_1	Nycteribia pedicularia	M	no	2017-09-11	Fall	Orlova Chuka	Cave	A1099	Myotis capaccinii	F
A1099_1_2	Nycteribia pedicularia	M	no	2017-09-11	Fall	Orlova Chuka	Cave	A1099	Myotis capaccinii	F
A1099_1_3	Nycteribia pedicularia	M	no	2017-09-11	Fall	Orlova Chuka	Cave	A1099	Myotis capaccinii	F
A1099_2_1	Nycteribia pedicularia	F	no	2017-09-11	Fall	Orlova Chuka	Cave	A1099	Myotis capaccinii	F
A1100_1_1	Penicillidia dufourii	M	no	2017-09-11	Fall	Orlova Chuka	Cave	A1100	Myotis myotis	F
A1100_2_1	Penicillidia dufourii	F	no	2017-09-11	Fall	Orlova Chuka	Cave	A1100	Myotis myotis	F
A1101_1_1	Penicillidia dufourii	M	no	2017-09-11	Fall	Orlova Chuka	Cave	A1101	Myotis capaccinii	M
A1101_2_1	Nycteribia pedicularia	M	no	2017-09-11	Fall	Orlova Chuka	Cave	A1101	Myotis capaccinii	M
A1101_3_1	Nycteribia pedicularia	F	no	2017-09-11	Fall	Orlova Chuka	Cave	A1101	Myotis capaccinii	M
A1101_3_2	Nycteribia pedicularia	F	no	2017-09-11	Fall	Orlova Chuka	Cave	A1101	Myotis capaccinii	M
A1102_1_1	Nycteribia pedicularia	M	no	2017-09-11	Fall	Orlova Chuka	Cave	A1102	Myotis capaccinii	F
A1102_1_2	Nycteribia pedicularia	M	no	2017-09-11	Fall	Orlova Chuka	Cave	A1102	Myotis capaccinii	F
A1102_1_3	Nycteribia pedicularia	M	no	2017-09-11	Fall	Orlova Chuka	Cave	A1102	Myotis capaccinii	F
A1102_1_4	Nycteribia pedicularia	M	no	2017-09-11	Fall	Orlova Chuka	Cave	A1102	Myotis capaccinii	F
A1102_1_5	Nycteribia pedicularia	M	no	2017-09-11	Fall	Orlova Chuka	Cave	A1102	Myotis capaccinii	F
A1102_2_1	Nycteribia pedicularia	F	no	2017-09-11	Fall	Orlova Chuka	Cave	A1102	Myotis capaccinii	F
A1102_2_2	Nycteribia pedicularia	F	no	2017-09-11	Fall	Orlova Chuka	Cave	A1102	Myotis capaccinii	F
A1104_1_1	Phthiridium biarticulatum	M	no	2017-09-11	Fall	Orlova Chuka	Cave	A1104	Rhinolophus mehelyi	M
A1104_1_2	Phthiridium biarticulatum	M	no	2017-09-11	Fall	Orlova Chuka	Cave	A1104	Rhinolophus mehelyi	M
A1105_1_1	Nycteribia vexata	F	no	2017-09-11	Fall	Orlova Chuka	Cave	A1105	Myotis myotis	F
A1108_1_1	Penicillidia dufourii	M	no	2017-09-11	Fall	Orlova Chuka	Cave	A1108	Myotis myotis	F
A1109_1_1	Penicillidia dufourii	F	no	2017-09-11	Fall	Orlova Chuka	Cave	A1109	Myotis myotis	F
A1112_1_1	Penicillidia conspicua	M	no	2017-09-11	Fall	Orlova Chuka	Cave	A1112	Miniopterus schreibersii	F
A1112_2_1	Penicillidia conspicua	F	yes	2017-09-11	Fall	Orlova Chuka	Cave	A1112	Miniopterus schreibersii	F
A1112_2_2	Penicillidia conspicua	F	no	2017-09-11	Fall	Orlova Chuka	Cave	A1112	Miniopterus schreibersii	F
A1112_3_1	Nycteribia schmidlii	M	no	2017-09-11	Fall	Orlova Chuka	Cave	A1112	Miniopterus schreibersii	F
A1112_4_1	Nycteribia schmidlii	F	no	2017-09-11	Fall	Orlova Chuka	Cave	A1112	Miniopterus schreibersii	F
A1112_4_2	Nycteribia schmidlii	F	no	2017-09-11	Fall	Orlova Chuka	Cave	A1112	Miniopterus schreibersii	F
A1113_1_1	Nycteribia schmidlii	F	no	2017-09-11	Fall	Orlova Chuka	Cave	A1113	Miniopterus schreibersii	F
A1114_1_1	Nycteribia schmidlii	F	no	2017-09-11	Fall	Orlova Chuka	Cave	A1114	Miniopterus schreibersii	M
A1115_1_1	Nycteribia schmidlii	F	no	2017-09-11	Fall	Orlova Chuka	Cave	A1115	Miniopterus schreibersii	F
A1115_2_1	Penicillidia conspicua	M	no	2017-09-11	Fall	Orlova Chuka	Cave	A1115	Miniopterus schreibersii	F
A1116_1_1	Phthiridium biarticulatum	M	no	2017-09-11	Fall	Orlova Chuka	Cave	A1116	Rhinolophus mehelyi	M
A1116_2_1	Phthiridium biarticulatum	F	no	2017-09-11	Fall	Orlova Chuka	Cave	A1116	Rhinolophus mehelyi	M
A1117_1_1	Phthiridium biarticulatum	M	no	2017-09-11	Fall	Orlova Chuka	Cave	A1117	Rhinolophus mehelyi	M
A1117_1_2	Phthiridium biarticulatum	M	no	2017-09-11	Fall	Orlova Chuka	Cave	A1117	Rhinolophus mehelyi	M
A1117_2_1	Phthiridium biarticulatum	F	no	2017-09-11	Fall	Orlova Chuka	Cave	A1117	Rhinolophus mehelyi	M
A1117_2_2	Phthiridium biarticulatum	F	no	2017-09-11	Fall	Orlova Chuka	Cave	A1117	Rhinolophus mehelyi	M
A1118_1_1	Phthiridium biarticulatum	M	yes	2017-09-11	Fall	Orlova Chuka	Cave	A1118	Rhinolophus ferrumequinum	M
A1118_1_2	Phthiridium biarticulatum	M	no	2017-09-11	Fall	Orlova Chuka	Cave	A1118	Rhinolophus ferrumequinum	M
A1118_1_3	Phthiridium biarticulatum	M	no	2017-09-11	Fall	Orlova Chuka	Cave	A1118	Rhinolophus ferrumequinum	M
A1120_1_1	Phthiridium biarticulatum	F	no	2017-09-11	Fall	Orlova Chuka	Cave	A1120	Rhinolophus mehelyi	M
A1121_1_1	Phthiridium biarticulatum	F	no	2017-09-11	Fall	Orlova Chuka	Cave	A1121	Rhinolophus mehelyi	M
A1123_1_1	Phthiridium biarticulatum	M	no	2017-09-11	Fall	Orlova Chuka	Cave	A1123	Rhinolophus mehelyi	F
A1123_2_1	Phthiridium biarticulatum	F	yes	2017-09-11	Fall	Orlova Chuka	Cave	A1123	Rhinolophus mehelyi	F
A1124_1_1	Phthiridium biarticulatum	M	no	2017-09-11	Fall	Orlova Chuka	Cave	A1124	Rhinolophus mehelyi	F
A1124_1_2	Phthiridium biarticulatum	M	no	2017-09-11	Fall	Orlova Chuka	Cave	A1124	Rhinolophus mehelyi	F
A1124_2_1	Phthiridium biarticulatum	F	no	2017-09-11	Fall	Orlova Chuka	Cave	A1124	Rhinolophus mehelyi	F
A1125_1_1	Phthiridium biarticulatum	M	no	2017-09-11	Fall	Orlova Chuka	Cave	A1125	Rhinolophus mehelyi	F
A1125_2_1	Phthiridium biarticulatum	F	no	2017-09-11	Fall	Orlova Chuka	Cave	A1125	Rhinolophus mehelyi	F
A1126_1_1	Phthiridium biarticulatum	M	no	2017-09-11	Fall	Orlova Chuka	Cave	A1126	Rhinolophus mehelyi	M
A1126_2_1	Phthiridium biarticulatum	F	no	2017-09-11	Fall	Orlova Chuka	Cave	A1126	Rhinolophus mehelyi	M
A1128_1_1	Penicillidia conspicua	M	no	2017-09-11	Fall	Orlova Chuka	Cave	A1128	Miniopterus schreibersii	M
A1128_2_1	Nycteribia schmidlii	F	no	2017-09-11	Fall	Orlova Chuka	Cave	A1128	Miniopterus schreibersii	M
A1128_2_2	Nycteribia schmidlii	F	no	2017-09-11	Fall	Orlova Chuka	Cave	A1128	Miniopterus schreibersii	M
A1129_1_1	Penicillidia conspicua	M	no	2017-09-11	Fall	Orlova Chuka	Cave	A1129	Myotis daubentonii	F
A1129_2_1	Nycteribia kolenatii	M	no	2017-09-11	Fall	Orlova Chuka	Cave	A1129	Myotis daubentonii	F
A1129_2_2	Nycteribia kolenatii	M	no	2017-09-11	Fall	Orlova Chuka	Cave	A1129	Myotis daubentonii	F
A1129_3_1	Nycteribia kolenatii	F	no	2017-09-11	Fall	Orlova Chuka	Cave	A1129	Myotis daubentonii	F
A1130_1_1	Nycteribia kolenatii	M	no	2017-09-11	Fall	Orlova Chuka	Cave	A1130	Myotis daubentonii	F
A1130_1_2	Nycteribia kolenatii	M	no	2017-09-11	Fall	Orlova Chuka	Cave	A1130	Myotis daubentonii	F
A1130_1_3	Nycteribia kolenatii	M	no	2017-09-11	Fall	Orlova Chuka	Cave	A1130	Myotis daubentonii	F
A1130_2_1	Nycteribia kolenatii	F	no	2017-09-11	Fall	Orlova Chuka	Cave	A1130	Myotis daubentonii	F
A1132_1_1	Phthiridium biarticulatum	M	no	2017-09-11	Fall	Orlova Chuka	Cave	A1132	Rhinolophus mehelyi	M
A1132_2_1	Phthiridium biarticulatum	F	no	2017-09-11	Fall	Orlova Chuka	Cave	A1132	Rhinolophus mehelyi	M
A1135_1_1	Nycteribia kolenatii	M	no	2017-09-11	Fall	Orlova Chuka	Cave	A1135	Myotis daubentonii	M
A1138_1_1	Phthiridium biarticulatum	M	no	2017-09-11	Fall	Orlova Chuka	Cave	A1138	Rhinolophus mehelyi	F
A1138_2_1	Phthiridium biarticulatum	F	no	2017-09-11	Fall	Orlova Chuka	Cave	A1138	Rhinolophus mehelyi	F
A1142_1_1	Penicillidia conspicua	F	no	2017-09-11	Fall	Orlova Chuka	Cave	A1142	Miniopterus schreibersii	F
A1142_1_2	Penicillidia conspicua	F	no	2017-09-11	Fall	Orlova Chuka	Cave	A1142	Miniopterus schreibersii	F
A1143_1_1	Phthiridium biarticulatum	F	no	2017-09-11	Fall	Orlova Chuka	Cave	A1143	Rhinolophus ferrumequinum	M
A1144_1_1	Phthiridium biarticulatum	M	no	2017-09-11	Fall	Orlova Chuka	Cave	A1144	Rhinolophus mehelyi	F
A1144_1_2	Phthiridium biarticulatum	M	no	2017-09-11	Fall	Orlova Chuka	Cave	A1144	Rhinolophus mehelyi	F
A1144_2_1	Penicillidia conspicua	F	no	2017-09-11	Fall	Orlova Chuka	Cave	A1144	Rhinolophus mehelyi	F
A1145_1_1	Penicillidia conspicua	M	no	2017-09-11	Fall	Orlova Chuka	Cave	A1145	Miniopterus schreibersii	F
A1145_2_1	Nycteribia schmidlii	M	no	2017-09-11	Fall	Orlova Chuka	Cave	A1145	Miniopterus schreibersii	F
A1145_3_1	Penicillidia conspicua	F	no	2017-09-11	Fall	Orlova Chuka	Cave	A1145	Miniopterus schreibersii	F
A1145_4_1	Nycteribia schmidlii	F	no	2017-09-11	Fall	Orlova Chuka	Cave	A1145	Miniopterus schreibersii	F
A1149_1_1	Penicillidia dufourii	M	no	2017-09-11	Fall	Orlova Chuka	Cave	A1149	Myotis blythii	F
A1150_1_1	Penicillidia dufourii	F	no	2017-09-11	Fall	Orlova Chuka	Cave	A1150	Myotis myotis	F
A1151_1_1	Nycteribia schmidlii	M	no	2017-09-11	Fall	Orlova Chuka	Cave	A1151	Miniopterus schreibersii	F
A1151_2_1	Penicillidia conspicua	F	yes	2017-09-11	Fall	Orlova Chuka	Cave	A1151	Miniopterus schreibersii	F
A1152_1_1	Penicillidia dufourii	M	no	2017-09-11	Fall	Orlova Chuka	Cave	A1152	Myotis blythii	M
A1154_1_1	Nycteribia schmidlii	M	no	2017-09-11	Fall	Orlova Chuka	Cave	A1154	Miniopterus schreibersii	F
A1155_1_1	Penicillidia conspicua	M	yes	2017-09-11	Fall	Orlova Chuka	Cave	A1155	Miniopterus schreibersii	F
A1155_2_1	Penicillidia dufourii	F	no	2017-09-11	Fall	Orlova Chuka	Cave	A1155	Miniopterus schreibersii	F
A1155_3_1	Nycteribia schmidlii	F	no	2017-09-11	Fall	Orlova Chuka	Cave	A1155	Miniopterus schreibersii	F
A1159_1_1	Penicillidia dufourii	F	no	2017-09-11	Fall	Orlova Chuka	Cave	A1159	Myotis blythii	F
A1161_1_1	Penicillidia dufourii	M	no	2017-09-11	Fall	Orlova Chuka	Cave	A1161	Myotis blythii	M
A1161_1_2	Penicillidia dufourii	M	no	2017-09-11	Fall	Orlova Chuka	Cave	A1161	Myotis blythii	M
A1161_2_1	Penicillidia dufourii	F	no	2017-09-11	Fall	Orlova Chuka	Cave	A1161	Myotis blythii	M
A1162_1_1	Penicillidia dufourii	M	no	2017-09-11	Fall	Orlova Chuka	Cave	A1162	Myotis blythii	F
A1162_1_2	Penicillidia dufourii	M	no	2017-09-11	Fall	Orlova Chuka	Cave	A1162	Myotis blythii	F
A1163_1_1	Penicillidia dufourii	F	no	2017-09-11	Fall	Orlova Chuka	Cave	A1163	Myotis blythii	M
A1164_1_1	Nycteribia kolenatii	M	no	2017-09-11	Fall	Orlova Chuka	Cave	A1164	Myotis daubentonii	M
A1164_2_1	Nycteribia kolenatii	F	no	2017-09-11	Fall	Orlova Chuka	Cave	A1164	Myotis daubentonii	M
A1165_1_1	Penicillidia dufourii	M	no	2017-09-11	Fall	Orlova Chuka	Cave	A1165	Miniopterus schreibersii	F
A1165_1_2	Penicillidia dufourii	M	no	2017-09-11	Fall	Orlova Chuka	Cave	A1165	Miniopterus schreibersii	F
A1165_2_1	Penicillidia conspicua	F	no	2017-09-11	Fall	Orlova Chuka	Cave	A1165	Miniopterus schreibersii	F
A1165_2_2	Penicillidia conspicua	F	no	2017-09-11	Fall	Orlova Chuka	Cave	A1165	Miniopterus schreibersii	F
A1172_1_1	Basilia nana	M	no	2017-08-29	Fall	Peștera Ferige	Cave	A1172	Myotis bechsteinii	M
A1172_2_1	Basilia nana	F	no	2017-08-29	Fall	Peștera Ferige	Cave	A1172	Myotis bechsteinii	M
A1174_1_1	Basilia nana	M	no	2017-08-26	Fall	Peștera Mare de la Merești	Cave	A1174	Myotis alcathoe	M
A1176_1_1	Basilia nana	M	no	2017-08-26	Fall	Peștera Mare de la Merești	Cave	A1176	Myotis bechsteinii	M
A1176_1_2	Basilia nana	M	no	2017-08-26	Fall	Peștera Mare de la Merești	Cave	A1176	Myotis bechsteinii	M
A1177_1_1	Basilia nana	F	no	2017-08-26	Fall	Peștera Mare de la Merești	Cave	A1177	Myotis bechsteinii	F
A1179_1_1	Nycteribia kolenatii	M	no	2017-08-26	Fall	Peștera Mare de la Merești	Cave	A1179	Myotis daubentonii	M
A1179_2_1	Nycteribia kolenatii	F	no	2017-08-26	Fall	Peștera Mare de la Merești	Cave	A1179	Myotis daubentonii	M
A1180_1_1	Nycteribia pedicularia	M	no	2017-08-26	Fall	Peștera Mare de la Merești	Cave	A1180	Myotis daubentonii	F
A1180_2_1	Nycteribia pedicularia	F	no	2017-08-26	Fall	Peștera Mare de la Merești	Cave	A1180	Myotis daubentonii	F
A1180_2_2	Nycteribia pedicularia	F	no	2017-08-26	Fall	Peștera Mare de la Merești	Cave	A1180	Myotis daubentonii	F
A1181_1_1	Basilia nana	M	no	2017-08-26	Fall	Peștera Mare de la Merești	Cave	A1181	Myotis bechsteinii	F
A1316_1_1	Nycteribia schmidlii	M	no	2017-10-20	Fall	Pivniță Castel Bánffy	Building	A1316	Miniopterus schreibersii	F
A1317_1_1	Nycteribia schmidlii	M	no	2017-10-20	Fall	Pivniță Castel Bánffy	Building	A1317	Miniopterus schreibersii	F
A1319_1_1	Nycteribia schmidlii	F	no	2017-10-20	Fall	Pivniță Castel Bánffy	Building	A1319	Miniopterus schreibersii	F
A1319_1_2	Nycteribia schmidlii	F	no	2017-10-20	Fall	Pivniță Castel Bánffy	Building	A1319	Miniopterus schreibersii	F
A1319_1_3	Nycteribia schmidlii	F	no	2017-10-20	Fall	Pivniță Castel Bánffy	Building	A1319	Miniopterus schreibersii	F
A1319_1_4	Nycteribia schmidlii	F	no	2017-10-20	Fall	Pivniță Castel Bánffy	Building	A1319	Miniopterus schreibersii	F
A1321_1_1	Nycteribia schmidlii	F	no	2017-10-20	Fall	Pivniță Castel Bánffy	Building	A1321	Miniopterus schreibersii	F
A1322_1_1	Nycteribia schmidlii	M	no	2017-10-20	Fall	Pivniță Castel Bánffy	Building	A1322	Miniopterus schreibersii	F
A1322_1_2	Nycteribia schmidlii	M	no	2017-10-20	Fall	Pivniță Castel Bánffy	Building	A1322	Miniopterus schreibersii	F
A1322_2_1	Nycteribia schmidlii	F	no	2017-10-20	Fall	Pivniță Castel Bánffy	Building	A1322	Miniopterus schreibersii	F
A1323_1_1	Nycteribia schmidlii	M	no	2017-10-20	Fall	Pivniță Castel Bánffy	Building	A1323	Miniopterus schreibersii	F
A1323_2_1	Nycteribia schmidlii	F	no	2017-10-20	Fall	Pivniță Castel Bánffy	Building	A1323	Miniopterus schreibersii	F
A1323_2_2	Nycteribia schmidlii	F	no	2017-10-20	Fall	Pivniță Castel Bánffy	Building	A1323	Miniopterus schreibersii	F
A1323_2_3	Nycteribia schmidlii	F	no	2017-10-20	Fall	Pivniță Castel Bánffy	Building	A1323	Miniopterus schreibersii	F
A1324_1_1	Nycteribia schmidlii	M	no	2017-10-20	Fall	Pivniță Castel Bánffy	Building	A1324	Miniopterus schreibersii	F
A1324_2_1	Penicillidia conspicua	F	no	2017-10-20	Fall	Pivniță Castel Bánffy	Building	A1324	Miniopterus schreibersii	F
A1325_1_1	Nycteribia schmidlii	M	no	2017-10-20	Fall	Pivniță Castel Bánffy	Building	A1325	Miniopterus schreibersii	F
A1325_1_2	Nycteribia schmidlii	M	no	2017-10-20	Fall	Pivniță Castel Bánffy	Building	A1325	Miniopterus schreibersii	F
A1325_2_1	Nycteribia schmidlii	F	no	2017-10-20	Fall	Pivniță Castel Bánffy	Building	A1325	Miniopterus schreibersii	F
A1325_2_2	Nycteribia schmidlii	F	no	2017-10-20	Fall	Pivniță Castel Bánffy	Building	A1325	Miniopterus schreibersii	F
A1325_2_3	Nycteribia schmidlii	F	no	2017-10-20	Fall	Pivniță Castel Bánffy	Building	A1325	Miniopterus schreibersii	F
A1326_1_1	Nycteribia schmidlii	F	no	2017-10-20	Fall	Pivniță Castel Bánffy	Building	A1326	Miniopterus schreibersii	F
A1326_1_2	Nycteribia schmidlii	F	no	2017-10-20	Fall	Pivniță Castel Bánffy	Building	A1326	Miniopterus schreibersii	F
A1326_1_3	Nycteribia schmidlii	F	no	2017-10-20	Fall	Pivniță Castel Bánffy	Building	A1326	Miniopterus schreibersii	F
A1326_1_4	Nycteribia schmidlii	F	no	2017-10-20	Fall	Pivniță Castel Bánffy	Building	A1326	Miniopterus schreibersii	F
A1327_1_1	Nycteribia schmidlii	F	no	2017-10-20	Fall	Pivniță Castel Bánffy	Building	A1327	Miniopterus schreibersii	F
A1328_1_1	Nycteribia schmidlii	M	no	2017-10-20	Fall	Pivniță Castel Bánffy	Building	A1328	Miniopterus schreibersii	F
A1328_2_1	Penicillidia conspicua	F	no	2017-10-20	Fall	Pivniță Castel Bánffy	Building	A1328	Miniopterus schreibersii	F
A1329_1_1	Nycteribia schmidlii	M	no	2017-10-20	Fall	Pivniță Castel Bánffy	Building	A1329	Miniopterus schreibersii	F
A1329_1_2	Nycteribia schmidlii	M	no	2017-10-20	Fall	Pivniță Castel Bánffy	Building	A1329	Miniopterus schreibersii	F
A1431_1_1	Penicillidia dufourii	F	no	2018-05-04	Sprig	Turn Carieră	Building	A1431	Myotis blythii	F
A1432_1_1	Penicillidia dufourii	M	yes	2018-05-04	Sprig	Turn Carieră	Building	A1432	Myotis blythii	F
A1434_1_1	Penicillidia dufourii	F	no	2018-05-04	Sprig	Turn Carieră	Building	A1434	Myotis blythii	F
A1435_1_1	Penicillidia dufourii	M	no	2018-05-04	Sprig	Turn Carieră	Building	A1435	Myotis blythii	F
A1435_2_1	Nycteribia vexata	F	no	2018-05-04	Sprig	Turn Carieră	Building	A1435	Myotis blythii	F
A1435_2_2	Nycteribia vexata	F	no	2018-05-04	Sprig	Turn Carieră	Building	A1435	Myotis blythii	F
A1436_1_1	Nycteribia latreilli	M	no	2018-05-04	Sprig	Turn Carieră	Building	A1436	Myotis blythii	F
A1436_2_1	Penicillidia dufourii	F	no	2018-05-04	Sprig	Turn Carieră	Building	A1436	Myotis blythii	F
A1438_1_1	Nycteribia latreilli	M	no	2018-05-04	Sprig	Turn Carieră	Building	A1438	Myotis blythii	F
A1438_2_1	Nycteribia vexata	F	no	2018-05-04	Sprig	Turn Carieră	Building	A1438	Myotis blythii	F
A1442_1_1	Penicillidia dufourii	F	no	2018-05-04	Sprig	Turn Carieră	Building	A1442	Myotis myotis	F
A1443_1_1	Penicillidia dufourii	M	no	2018-05-04	Sprig	Turn Carieră	Building	A1443	Myotis blythii	F
A1445_1_1	Penicillidia dufourii	F	no	2018-05-04	Sprig	Turn Carieră	Building	A1445	Myotis myotis	F
A1446_1_1	Penicillidia dufourii	M	no	2018-05-04	Sprig	Turn Carieră	Building	A1446	Myotis blythii	F
A1450_1_1	Penicillidia dufourii	F	no	2018-05-04	Sprig	Turn Carieră	Building	A1450	Myotis blythii	F
A1452_1_1	Penicillidia dufourii	M	no	2018-05-04	Sprig	Turn Carieră	Building	A1452	Myotis myotis	F
A1452_2_1	Penicillidia dufourii	F	no	2018-05-04	Sprig	Turn Carieră	Building	A1452	Myotis myotis	F
A1453_1_1	Penicillidia dufourii	F	no	2018-05-04	Sprig	Turn Carieră	Building	A1453	Myotis blythii	F
A1453_2_1	Nycteribia latreilli	F	no	2018-05-04	Sprig	Turn Carieră	Building	A1453	Myotis blythii	F
A1459_1_1	Nycteribia latreilli	M	no	2018-05-04	Sprig	Turn Carieră	Building	A1459	Myotis blythii	F
A1459_2_1	Nycteribia vexata	F	no	2018-05-04	Sprig	Turn Carieră	Building	A1459	Myotis blythii	F
A1460_1_1	Penicillidia dufourii	F	no	2018-05-04	Sprig	Turn Carieră	Building	A1460	Myotis blythii	F
A1460_1_2	Penicillidia dufourii	F	no	2018-05-04	Sprig	Turn Carieră	Building	A1460	Myotis blythii	F
A1460_2_1	Nycteribia vexata	F	yes	2018-05-04	Sprig	Turn Carieră	Building	A1460	Myotis blythii	F
A1461_1_1	Penicillidia dufourii	F	yes	2018-05-04	Sprig	Turn Carieră	Building	A1461	Myotis blythii	F
A1533_1_1	Phthiridium biarticulatum	F	no	2018-07-31	Fall	Clădirea Carierei	Building	A1533	Rhinolophus ferrumequinum	M
A1533_1_2	Phthiridium biarticulatum	F	no	2018-07-31	Fall	Clădirea Carierei	Building	A1533	Rhinolophus ferrumequinum	M
A1543_1_1	Phthiridium biarticulatum	F	no	2018-07-31	Fall	Clădirea Carierei	Building	A1543	Rhinolophus ferrumequinum	F
A1547_1_1	Penicillidia dufourii	F	no	2018-07-31	Fall	Pod	Building	A1547	Myotis daubentonii	M
A1547_2_1	Nycteribia latreilli	F	no	2018-07-31	Fall	Pod	Building	A1547	Myotis daubentonii	M
A1556_1_1	Penicillidia dufourii	M	no	2018-07-31	Fall	Galeria din Carieră	Mine	A1556	Rhinolophus ferrumequinum	M
A1556_2_1	Nycteribia latreilli	M	no	2018-07-31	Fall	Galeria din Carieră	Mine	A1556	Rhinolophus ferrumequinum	M
A1556_2_2	Nycteribia latreilli	M	no	2018-07-31	Fall	Galeria din Carieră	Mine	A1556	Rhinolophus ferrumequinum	M
A1556_2_3	Nycteribia latreilli	M	no	2018-07-31	Fall	Galeria din Carieră	Mine	A1556	Rhinolophus ferrumequinum	M
A1556_2_4	Nycteribia latreilli	M	no	2018-07-31	Fall	Galeria din Carieră	Mine	A1556	Rhinolophus ferrumequinum	M
A1556_3_1	Nycteribia latreilli	F	no	2018-07-31	Fall	Galeria din Carieră	Mine	A1556	Rhinolophus ferrumequinum	M
A1556_3_2	Nycteribia latreilli	F	no	2018-07-31	Fall	Galeria din Carieră	Mine	A1556	Rhinolophus ferrumequinum	M
A1556_3_3	Nycteribia latreilli	F	no	2018-07-31	Fall	Galeria din Carieră	Mine	A1556	Rhinolophus ferrumequinum	M
A1556_4_1	Phthiridium biarticulatum	M	no	2018-07-31	Fall	Galeria din Carieră	Mine	A1556	Rhinolophus ferrumequinum	M
A1557_1_1	Phthiridium biarticulatum	M	no	2018-07-31	Fall	Galeria din Carieră	Mine	A1557	Rhinolophus ferrumequinum	M
A1557_1_2	Phthiridium biarticulatum	M	no	2018-07-31	Fall	Galeria din Carieră	Mine	A1557	Rhinolophus ferrumequinum	M
A1557_2_1	Phthiridium biarticulatum	F	no	2018-07-31	Fall	Galeria din Carieră	Mine	A1557	Rhinolophus ferrumequinum	M
A1601_1_1	Phthiridium biarticulatum	F	no	2018-08-01	Fall	Clădirea Carierei	Building	A1601	Rhinolophus ferrumequinum	F
A1601_1_2	Phthiridium biarticulatum	F	no	2018-08-01	Fall	Clădirea Carierei	Building	A1601	Rhinolophus ferrumequinum	F
A1611_1_1	Penicillidia dufourii	M	yes	2018-08-01	Fall	Clădirea Carierei	Building	A1611	Myotis blythii	F
A1611_1_2	Penicillidia dufourii	M	no	2018-08-01	Fall	Clădirea Carierei	Building	A1611	Myotis blythii	F
A1611_2_1	Penicillidia dufourii	F	yes	2018-08-01	Fall	Clădirea Carierei	Building	A1611	Myotis blythii	F
A1611_2_2	Penicillidia dufourii	F	no	2018-08-01	Fall	Clădirea Carierei	Building	A1611	Myotis blythii	F
A1611_2_3	Penicillidia dufourii	F	no	2018-08-01	Fall	Clădirea Carierei	Building	A1611	Myotis blythii	F
A1621_1_1	Nycteribia schmidlii	M	no	2018-08-02	Fall	Galeria din Pădure	Mine	A1621	Miniopterus schreibersii	M
A1621_2_1	Nycteribia schmidlii	F	no	2018-08-02	Fall	Galeria din Pădure	Mine	A1621	Miniopterus schreibersii	M
A1621_2_2	Nycteribia schmidlii	F	no	2018-08-02	Fall	Galeria din Pădure	Mine	A1621	Miniopterus schreibersii	M
A1621_2_3	Nycteribia schmidlii	F	no	2018-08-02	Fall	Galeria din Pădure	Mine	A1621	Miniopterus schreibersii	M
A1621_2_4	Nycteribia schmidlii	F	no	2018-08-02	Fall	Galeria din Pădure	Mine	A1621	Miniopterus schreibersii	M
A1621_2_5	Nycteribia schmidlii	F	no	2018-08-02	Fall	Galeria din Pădure	Mine	A1621	Miniopterus schreibersii	M
A1621_2_6	Nycteribia schmidlii	F	no	2018-08-02	Fall	Galeria din Pădure	Mine	A1621	Miniopterus schreibersii	M
A1621_3_1	Penicillidia conspicua	M	yes	2018-08-02	Fall	Galeria din Pădure	Mine	A1621	Miniopterus schreibersii	M
A1621_4_1	Penicillidia conspicua	F	no	2018-08-02	Fall	Galeria din Pădure	Mine	A1621	Miniopterus schreibersii	M
A1626_1_1	Penicillidia conspicua	F	no	2018-08-02	Fall	Galeria din Pădure	Mine	A1626	Miniopterus schreibersii	M
A1629_1_1	Penicillidia conspicua	F	no	2018-08-02	Fall	Galeria din Pădure	Mine	A1629	Miniopterus schreibersii	M
A1629_2_1	Nycteribia schmidlii	F	yes	2018-08-02	Fall	Galeria din Pădure	Mine	A1629	Miniopterus schreibersii	M
A1631_1_1	Penicillidia conspicua	M	no	2018-08-02	Fall	Galeria din Pădure	Mine	A1631	Miniopterus schreibersii	M
A1631_2_1	Penicillidia conspicua	F	no	2018-08-02	Fall	Galeria din Pădure	Mine	A1631	Miniopterus schreibersii	M
A1631_2_2	Penicillidia conspicua	F	no	2018-08-02	Fall	Galeria din Pădure	Mine	A1631	Miniopterus schreibersii	M
A1631_3_1	Nycteribia schmidlii	F	no	2018-08-02	Fall	Galeria din Pădure	Mine	A1631	Miniopterus schreibersii	M
A1631_3_2	Nycteribia schmidlii	F	no	2018-08-02	Fall	Galeria din Pădure	Mine	A1631	Miniopterus schreibersii	M
A1634_1_1	Penicillidia dufourii	F	yes	2018-08-02	Fall	Galeria din Pădure	Mine	A1634	Myotis blythii	F
A1634_2_1	Nycteribia vexata	F	yes	2018-08-02	Fall	Galeria din Pădure	Mine	A1634	Myotis blythii	F
A1634_2_2	Nycteribia vexata	F	no	2018-08-02	Fall	Galeria din Pădure	Mine	A1634	Myotis blythii	F
A1635_1_1	Penicillidia dufourii	M	yes	2018-08-02	Fall	Galeria din Pădure	Mine	A1635	Myotis blythii	F
A1635_1_2	Penicillidia dufourii	M	yes	2018-08-02	Fall	Galeria din Pădure	Mine	A1635	Myotis blythii	F
A1635_2_1	Penicillidia dufourii	F	yes	2018-08-02	Fall	Galeria din Pădure	Mine	A1635	Myotis blythii	F
A1636_1_1	Penicillidia dufourii	F	no	2018-08-02	Fall	Galeria din Pădure	Mine	A1636	Myotis blythii	M
A1636_2_1	Nycteribia latreilli	M	yes	2018-08-02	Fall	Galeria din Pădure	Mine	A1636	Myotis blythii	M
A1636_2_2	Nycteribia latreilli	M	no	2018-08-02	Fall	Galeria din Pădure	Mine	A1636	Myotis blythii	M
A1636_2_3	Nycteribia latreilli	M	no	2018-08-02	Fall	Galeria din Pădure	Mine	A1636	Myotis blythii	M
A1636_3_1	Nycteribia latreilli	F	no	2018-08-02	Fall	Galeria din Pădure	Mine	A1636	Myotis blythii	M
A1637_1_1	Penicillidia dufourii	M	no	2018-08-02	Fall	Galeria din Pădure	Mine	A1637	Myotis blythii	M
A1637_2_1	Penicillidia dufourii	F	yes	2018-08-02	Fall	Galeria din Pădure	Mine	A1637	Myotis blythii	M
A1638_1_1	Nycteribia vexata	M	no	2018-08-02	Fall	Galeria din Pădure	Mine	A1638	Myotis myotis	F
A1638_1_2	Nycteribia vexata	M	no	2018-08-02	Fall	Galeria din Pădure	Mine	A1638	Myotis myotis	F
A1638_2_1	Nycteribia vexata	F	no	2018-08-02	Fall	Galeria din Pădure	Mine	A1638	Myotis myotis	F
A1638_2_2	Nycteribia vexata	F	no	2018-08-02	Fall	Galeria din Pădure	Mine	A1638	Myotis myotis	F
A1638_2_3	Nycteribia vexata	F	no	2018-08-02	Fall	Galeria din Pădure	Mine	A1638	Myotis myotis	F
A1638_3_1	Nycteribia latreilli	M	no	2018-08-02	Fall	Galeria din Pădure	Mine	A1638	Myotis myotis	F
A1638_3_2	Nycteribia latreilli	M	no	2018-08-02	Fall	Galeria din Pădure	Mine	A1638	Myotis myotis	F
A1638_4_1	Nycteribia latreilli	F	no	2018-08-02	Fall	Galeria din Pădure	Mine	A1638	Myotis myotis	F
A1638_5_1	Penicillidia dufourii	F	no	2018-08-02	Fall	Galeria din Pădure	Mine	A1638	Myotis myotis	F
A1638_5_2	Penicillidia dufourii	F	no	2018-08-02	Fall	Galeria din Pădure	Mine	A1638	Myotis myotis	F
A1639_1_1	Penicillidia dufourii	M	no	2018-08-02	Fall	Galeria din Pădure	Mine	A1639	Myotis myotis	F
A1639_1_2	Penicillidia dufourii	M	no	2018-08-02	Fall	Galeria din Pădure	Mine	A1639	Myotis myotis	F
A1639_2_1	Nycteribia vexata	M	no	2018-08-02	Fall	Galeria din Pădure	Mine	A1639	Myotis myotis	F
A1639_3_1	Nycteribia vexata	F	no	2018-08-02	Fall	Galeria din Pădure	Mine	A1639	Myotis myotis	F
A1641_1_1	Penicillidia dufourii	F	no	2018-08-02	Fall	Galeria din Pădure	Mine	A1641	Myotis blythii	M
A1641_1_2	Penicillidia dufourii	F	no	2018-08-02	Fall	Galeria din Pădure	Mine	A1641	Myotis blythii	M
A1641_1_3	Penicillidia dufourii	F	no	2018-08-02	Fall	Galeria din Pădure	Mine	A1641	Myotis blythii	M
A1642_1_1	Nycteribia latreilli	F	no	2018-08-02	Fall	Galeria din Pădure	Mine	A1642	Myotis blythii	F
A1642_1_2	Nycteribia latreilli	F	no	2018-08-02	Fall	Galeria din Pădure	Mine	A1642	Myotis blythii	F
A1642_2_1	Penicillidia dufourii	M	no	2018-08-02	Fall	Galeria din Pădure	Mine	A1642	Myotis blythii	F
A1642_3_1	Penicillidia dufourii	F	no	2018-08-02	Fall	Galeria din Pădure	Mine	A1642	Myotis blythii	F
A1642_4_1	Nycteribia latreilli	F	no	2018-08-02	Fall	Galeria din Pădure	Mine	A1642	Myotis blythii	F
A1642_4_2	Nycteribia latreilli	F	no	2018-08-02	Fall	Galeria din Pădure	Mine	A1642	Myotis blythii	F
A1643_1_1	Penicillidia dufourii	M	no	2018-08-02	Fall	Galeria din Pădure	Mine	A1643	Myotis blythii	F
A1644_1_1	Penicillidia dufourii	M	no	2018-08-02	Fall	Galeria din Pădure	Mine	A1644	Myotis myotis	M
A1644_2_1	Penicillidia dufourii	F	no	2018-08-02	Fall	Galeria din Pădure	Mine	A1644	Myotis myotis	M
A1644_2_2	Penicillidia dufourii	F	no	2018-08-02	Fall	Galeria din Pădure	Mine	A1644	Myotis myotis	M
A1645_1_1	Penicillidia dufourii	M	yes	2018-08-02	Fall	Galeria din Pădure	Mine	A1645	Myotis blythii	F
A1645_2_1	Penicillidia dufourii	F	no	2018-08-02	Fall	Galeria din Pădure	Mine	A1645	Myotis blythii	F
A1645_3_1	Nycteribia latreilli	M	no	2018-08-02	Fall	Galeria din Pădure	Mine	A1645	Myotis blythii	F
A1646_1_1	Penicillidia dufourii	M	no	2018-08-02	Fall	Galeria din Pădure	Mine	A1646	Myotis blythii	F
A1646_2_1	Nycteribia vexata	M	yes	2018-08-02	Fall	Galeria din Pădure	Mine	A1646	Myotis blythii	F
A1647_1_1	Nycteribia vexata	M	no	2018-08-02	Fall	Galeria din Pădure	Mine	A1647	Myotis blythii	M
A1647_1_2	Nycteribia vexata	M	no	2018-08-02	Fall	Galeria din Pădure	Mine	A1647	Myotis blythii	M
A1647_1_3	Nycteribia vexata	M	no	2018-08-02	Fall	Galeria din Pădure	Mine	A1647	Myotis blythii	M
A1647_1_4	Nycteribia vexata	M	no	2018-08-02	Fall	Galeria din Pădure	Mine	A1647	Myotis blythii	M
A1647_2_1	Nycteribia vexata	F	no	2018-08-02	Fall	Galeria din Pădure	Mine	A1647	Myotis blythii	M
A1647_3_1	Nycteribia latreilli	M	no	2018-08-02	Fall	Galeria din Pădure	Mine	A1647	Myotis blythii	M
A1647_3_2	Nycteribia latreilli	M	no	2018-08-02	Fall	Galeria din Pădure	Mine	A1647	Myotis blythii	M
A1647_4_1	Nycteribia latreilli	F	no	2018-08-02	Fall	Galeria din Pădure	Mine	A1647	Myotis blythii	M
A1647_5_1	Penicillidia dufourii	M	no	2018-08-02	Fall	Galeria din Pădure	Mine	A1647	Myotis blythii	M
A1648_1_1	Phthiridium biarticulatum	M	no	2018-08-02	Fall	Galeria din Pădure	Mine	A1648	Myotis blythii	F
A1649_1_1	Nycteribia latreilli	M	no	2018-08-02	Fall	Galeria din Pădure	Mine	A1649	Myotis blythii	F
A1649_2_1	Penicillidia dufourii	F	no	2018-08-02	Fall	Galeria din Pădure	Mine	A1649	Myotis blythii	F
A1649_2_2	Penicillidia dufourii	F	no	2018-08-02	Fall	Galeria din Pădure	Mine	A1649	Myotis blythii	F
A1650_1_1	Nycteribia vexata	M	no	2018-08-02	Fall	Galeria din Pădure	Mine	A1650	Myotis blythii	F
A1650_2_1	Penicillidia dufourii	F	no	2018-08-02	Fall	Galeria din Pădure	Mine	A1650	Myotis blythii	F
A1651_1_1	Nycteribia latreilli	M	no	2018-08-02	Fall	Galeria din Pădure	Mine	A1651	Myotis blythii	F
A1651_1_2	Nycteribia latreilli	M	no	2018-08-02	Fall	Galeria din Pădure	Mine	A1651	Myotis blythii	F
A1651_1_3	Nycteribia latreilli	M	no	2018-08-02	Fall	Galeria din Pădure	Mine	A1651	Myotis blythii	F
A1651_1_4	Nycteribia latreilli	M	no	2018-08-02	Fall	Galeria din Pădure	Mine	A1651	Myotis blythii	F
A1651_1_5	Nycteribia latreilli	M	no	2018-08-02	Fall	Galeria din Pădure	Mine	A1651	Myotis blythii	F
A1651_2_1	Nycteribia schmidlii	M	no	2018-08-02	Fall	Galeria din Pădure	Mine	A1651	Myotis blythii	F
A1651_3_1	Nycteribia vexata	F	no	2018-08-02	Fall	Galeria din Pădure	Mine	A1651	Myotis blythii	F
A1652_1_1	Penicillidia dufourii	M	no	2018-08-02	Fall	Galeria din Pădure	Mine	A1652	Myotis blythii	F
A1652_1_2	Penicillidia dufourii	M	no	2018-08-02	Fall	Galeria din Pădure	Mine	A1652	Myotis blythii	F
A1652_2_1	Penicillidia dufourii	F	yes	2018-08-02	Fall	Galeria din Pădure	Mine	A1652	Myotis blythii	F
A1653_1_1	Nycteribia vexata	M	yes	2018-08-02	Fall	Galeria din Pădure	Mine	A1653	Myotis blythii	F
A1653_1_2	Nycteribia vexata	M	no	2018-08-02	Fall	Galeria din Pădure	Mine	A1653	Myotis blythii	F
A1653_1_3	Nycteribia vexata	M	no	2018-08-02	Fall	Galeria din Pădure	Mine	A1653	Myotis blythii	F
A1653_1_4	Nycteribia vexata	M	no	2018-08-02	Fall	Galeria din Pădure	Mine	A1653	Myotis blythii	F
A1653_1_5	Nycteribia vexata	M	no	2018-08-02	Fall	Galeria din Pădure	Mine	A1653	Myotis blythii	F
A1653_2_1	Nycteribia vexata	F	no	2018-08-02	Fall	Galeria din Pădure	Mine	A1653	Myotis blythii	F
A1653_2_2	Nycteribia vexata	F	no	2018-08-02	Fall	Galeria din Pădure	Mine	A1653	Myotis blythii	F
A1653_3_1	Nycteribia latreilli	M	no	2018-08-02	Fall	Galeria din Pădure	Mine	A1653	Myotis blythii	F
A1653_4_1	Nycteribia latreilli	F	no	2018-08-02	Fall	Galeria din Pădure	Mine	A1653	Myotis blythii	F
A1653_4_2	Nycteribia latreilli	F	no	2018-08-02	Fall	Galeria din Pădure	Mine	A1653	Myotis blythii	F
A1653_4_3	Nycteribia latreilli	F	no	2018-08-02	Fall	Galeria din Pădure	Mine	A1653	Myotis blythii	F
A1653_4_4	Nycteribia latreilli	F	no	2018-08-02	Fall	Galeria din Pădure	Mine	A1653	Myotis blythii	F
A1653_5_1	Penicillidia dufourii	F	no	2018-08-02	Fall	Galeria din Pădure	Mine	A1653	Myotis blythii	F
A1654_1_1	Penicillidia dufourii	F	no	2018-08-02	Fall	Galeria din Pădure	Mine	A1654	Myotis blythii	M
A1654_2_1	Nycteribia latreilli	F	no	2018-08-02	Fall	Galeria din Pădure	Mine	A1654	Myotis blythii	M
A1655_1_1	Penicillidia dufourii	F	no	2018-08-02	Fall	Galeria din Pădure	Mine	A1655	Myotis blythii	F
A1655_2_1	Nycteribia vexata	F	no	2018-08-02	Fall	Galeria din Pădure	Mine	A1655	Myotis blythii	F
A1657_1_1	Penicillidia dufourii	F	no	2018-08-02	Fall	Galeria din Pădure	Mine	A1657	Myotis blythii	F
A1658_1_1	Penicillidia dufourii	M	yes	2018-08-02	Fall	Galeria din Pădure	Mine	A1658	Myotis blythii	F
A1658_2_1	Penicillidia dufourii	F	yes	2018-08-02	Fall	Galeria din Pădure	Mine	A1658	Myotis blythii	F
A1660_1_1	Nycteribia vexata	M	no	2018-08-02	Fall	Galeria din Pădure	Mine	A1660	Myotis daubentonii	M
A1660_2_1	Nycteribia latreilli	M	no	2018-08-02	Fall	Galeria din Pădure	Mine	A1660	Myotis daubentonii	M
A1660_3_1	Nycteribia latreilli	F	no	2018-08-02	Fall	Galeria din Pădure	Mine	A1660	Myotis daubentonii	M
A1660_3_2	Nycteribia latreilli	F	no	2018-08-02	Fall	Galeria din Pădure	Mine	A1660	Myotis daubentonii	M
A1660_3_3	Nycteribia latreilli	F	no	2018-08-02	Fall	Galeria din Pădure	Mine	A1660	Myotis daubentonii	M
A1661_1_1	Nycteribia latreilli	M	no	2018-08-02	Fall	Galeria din Pădure	Mine	A1661	Myotis daubentonii	M
A1661_1_2	Nycteribia latreilli	M	no	2018-08-02	Fall	Galeria din Pădure	Mine	A1661	Myotis daubentonii	M
A1661_2_1	Penicillidia dufourii	F	yes	2018-08-02	Fall	Galeria din Pădure	Mine	A1661	Myotis daubentonii	M
A1663_1_1	Nycteribia latreilli	M	no	2018-08-02	Fall	Galeria din Pădure	Mine	A1663	Myotis daubentonii	M
A1663_2_1	Nycteribia latreilli	F	no	2018-08-02	Fall	Galeria din Pădure	Mine	A1663	Myotis daubentonii	M
A1663_2_2	Nycteribia latreilli	F	no	2018-08-02	Fall	Galeria din Pădure	Mine	A1663	Myotis daubentonii	M
A1663_2_3	Nycteribia latreilli	F	no	2018-08-02	Fall	Galeria din Pădure	Mine	A1663	Myotis daubentonii	M
A1663_3_1	Nycteribia vexata	M	no	2018-08-02	Fall	Galeria din Pădure	Mine	A1663	Myotis daubentonii	M
A1663_4_1	Nycteribia vexata	F	yes	2018-08-02	Fall	Galeria din Pădure	Mine	A1663	Myotis daubentonii	M
A1664_1_1	Nycteribia vexata	M	no	2018-08-02	Fall	Galeria din Pădure	Mine	A1664	Myotis myotis	F
A1664_1_2	Nycteribia vexata	M	no	2018-08-02	Fall	Galeria din Pădure	Mine	A1664	Myotis myotis	F
A1664_1_3	Nycteribia vexata	M	no	2018-08-02	Fall	Galeria din Pădure	Mine	A1664	Myotis myotis	F
A1664_2_1	Nycteribia latreilli	M	no	2018-08-02	Fall	Galeria din Pădure	Mine	A1664	Myotis myotis	F
A1664_2_2	Nycteribia latreilli	M	no	2018-08-02	Fall	Galeria din Pădure	Mine	A1664	Myotis myotis	F
A1664_2_3	Nycteribia latreilli	M	no	2018-08-02	Fall	Galeria din Pădure	Mine	A1664	Myotis myotis	F
A1664_3_1	Penicillidia dufourii	M	no	2018-08-02	Fall	Galeria din Pădure	Mine	A1664	Myotis myotis	F
A1664_4_1	Penicillidia dufourii	F	yes	2018-08-02	Fall	Galeria din Pădure	Mine	A1664	Myotis myotis	F
A1665_1_1	Nycteribia latreilli	F	no	2018-08-02	Fall	Galeria din Pădure	Mine	A1665	Myotis daubentonii	M
A1665_1_2	Nycteribia latreilli	F	no	2018-08-02	Fall	Galeria din Pădure	Mine	A1665	Myotis daubentonii	M
A1666_1_1	Nycteribia latreilli	M	no	2018-08-02	Fall	Galeria din Pădure	Mine	A1666	Myotis daubentonii	M
A1666_2_1	Nycteribia latreilli	F	no	2018-08-02	Fall	Galeria din Pădure	Mine	A1666	Myotis daubentonii	M
A1667_1_1	Nycteribia latreilli	M	no	2018-08-02	Fall	Galeria din Pădure	Mine	A1667	Myotis capaccinii	F
A1667_1_2	Nycteribia latreilli	M	no	2018-08-02	Fall	Galeria din Pădure	Mine	A1667	Myotis capaccinii	F
A1670_1_1	Nycteribia latreilli	M	no	2018-08-02	Fall	Galeria din Pădure	Mine	A1670	Myotis capaccinii	M
A1670_2_1	Nycteribia latreilli	F	no	2018-08-02	Fall	Galeria din Pădure	Mine	A1670	Myotis capaccinii	M
A1671_1_1	Penicillidia dufourii	M	no	2018-08-02	Fall	Galeria din Pădure	Mine	A1671	Myotis daubentonii	M
A1671_2_1	Nycteribia latreilli	M	no	2018-08-02	Fall	Galeria din Pădure	Mine	A1671	Myotis daubentonii	M
A1675_1_1	Penicillidia dufourii	M	no	2018-08-02	Fall	Galeria din Pădure	Mine	A1675	Myotis capaccinii	F
A1678_1_1	Phthiridium biarticulatum	M	no	2018-08-02	Fall	Galeria din Pădure	Mine	A1678	Rhinolophus mehelyi	M
A1680_1_1	Phthiridium biarticulatum	M	no	2018-08-02	Fall	Galeria din Pădure	Mine	A1680	Rhinolophus ferrumequinum	F
A1681_1_1	Phthiridium biarticulatum	M	no	2018-08-02	Fall	Galeria din Pădure	Mine	A1681	Rhinolophus ferrumequinum	M
A1686_1_1	Phthiridium biarticulatum	M	no	2018-08-02	Fall	Galeria din Pădure	Mine	A1686	Rhinolophus ferrumequinum	M
A1689_1_1	Nycteribia latreilli	M	no	2018-08-02	Fall	Galeria din Pădure	Mine	A1689	Myotis capaccinii	F
A1689_1_2	Nycteribia latreilli	M	no	2018-08-02	Fall	Galeria din Pădure	Mine	A1689	Myotis capaccinii	F
A1689_1_3	Nycteribia latreilli	M	no	2018-08-02	Fall	Galeria din Pădure	Mine	A1689	Myotis capaccinii	F
A1689_2_1	Penicillidia dufourii	M	yes	2018-08-02	Fall	Galeria din Pădure	Mine	A1689	Myotis capaccinii	F
A1689_3_1	Penicillidia dufourii	F	no	2018-08-02	Fall	Galeria din Pădure	Mine	A1689	Myotis capaccinii	F
A1691_1_1	Nycteribia kolenatii	M	no	2018-08-02	Fall	Galeria din Pădure	Mine	A1691	Myotis daubentonii	M
A1691_1_2	Nycteribia kolenatii	M	no	2018-08-02	Fall	Galeria din Pădure	Mine	A1691	Myotis daubentonii	M
A1691_2_1	Nycteribia kolenatii	F	yes	2018-08-02	Fall	Galeria din Pădure	Mine	A1691	Myotis daubentonii	M
A1691_2_2	Nycteribia kolenatii	F	no	2018-08-02	Fall	Galeria din Pădure	Mine	A1691	Myotis daubentonii	M
A1702_1_1	Phthiridium biarticulatum	F	no	2018-09-19	Fall	Peștera Kőlyuk	Cave	A1702	Rhinolophus hipposideros	F
A1703_1_1	Penicillidia dufourii	M	no	2018-08-23	Fall	Peștera Lócsűr	Cave	A1703	Myotis blythii	M
A1706_1_1	Penicillidia conspicua	F	yes	2018-08-23	Fall	Peștera Lócsűr	Cave	A1706	Miniopterus schreibersii	F
A1706_1_2	Penicillidia conspicua	F	yes	2018-08-23	Fall	Peștera Lócsűr	Cave	A1706	Miniopterus schreibersii	F
A1707_1_1	Nycteribia latreilli	M	no	2018-08-23	Fall	Peștera Lócsűr	Cave	A1707	Myotis daubentonii	M
A1707_1_2	Nycteribia latreilli	M	no	2018-08-23	Fall	Peștera Lócsűr	Cave	A1707	Myotis daubentonii	M
A1707_2_1	Nycteribia kolenatii	F	no	2018-08-23	Fall	Peștera Lócsűr	Cave	A1707	Myotis daubentonii	M
A1709_1_1	Basilia nana	F	no	2018-08-25	Fall	Peștera Lócsűr	Cave	A1709	Myotis bechsteinii	M
A1709_1_2	Basilia nana	F	no	2018-08-25	Fall	Peștera Lócsűr	Cave	A1709	Myotis bechsteinii	M
A1709_1_3	Basilia nana	F	no	2018-08-25	Fall	Peștera Lócsűr	Cave	A1709	Myotis bechsteinii	M
A1709_1_4	Basilia nana	F	no	2018-08-25	Fall	Peștera Lócsűr	Cave	A1709	Myotis bechsteinii	M
A1710_1_1	Nycteribia kolenatii	M	no	2017-09-21	Fall	Muntele Puciosu	Cave	A1710	Myotis bechsteinii	M
A1710_1_2	Nycteribia kolenatii	M	no	2017-09-21	Fall	Muntele Puciosu	Cave	A1710	Myotis bechsteinii	M
A1711_1_1	Phthiridium biarticulatum	M	no	2018-08-21	Fall	Muntele Puciosu	Cave	A1711	Myotis alcathoe	F
A1735_1_1	Nycteribia kolenatii	F	no	2018-09-08	Fall	Galeria din Pădure	Mine	A1735	Miniopterus schreibersii	F
A1736_1_1	Phthiridium biarticulatum	M	no	2018-09-08	Fall	Galeria din Pădure	Mine	A1736	Miniopterus schreibersii	M
A1739_1_1	Nycteribia kolenatii	M	no	2018-09-08	Fall	Galeria din Pădure	Mine	A1739	Miniopterus schreibersii	F
A1742_1_1	Nycteribia latreilli	M	no	2018-09-08	Fall	Galeria din Pădure	Mine	A1742	Miniopterus schreibersii	M
A1747_1_1	Phthiridium biarticulatum	M	no	2018-09-08	Fall	Galeria din Pădure	Mine	A1747	Miniopterus schreibersii	F
A1751_1_1	Penicillidia conspicua	F	yes	2018-09-08	Fall	Galeria din Pădure	Mine	A1751	Miniopterus schreibersii	F
A1752_1_1	Penicillidia conspicua	M	yes	2018-09-08	Fall	Galeria din Pădure	Mine	A1752	Miniopterus schreibersii	F
A1753_1_1	Nycteribia schmidlii	F	no	2018-09-08	Fall	Galeria din Pădure	Mine	A1753	Miniopterus schreibersii	F
A1754_1_1	Nycteribia schmidlii	F	yes	2018-09-08	Fall	Galeria din Pădure	Mine	A1754	Miniopterus schreibersii	M
A1759_1_1	Penicillidia conspicua	F	yes	2018-10-06	Fall	Galeria din Pădure	Mine	A1759	Miniopterus schreibersii	M
A1760_1_1	Penicillidia conspicua	M	yes	2018-10-06	Fall	Galeria din Pădure	Mine	A1760	Miniopterus schreibersii	F
A1760_2_1	Penicillidia conspicua	F	yes	2018-10-06	Fall	Galeria din Pădure	Mine	A1760	Miniopterus schreibersii	F
A1761_1_1	Penicillidia conspicua	M	yes	2018-10-06	Fall	Galeria din Pădure	Mine	A1761	Miniopterus schreibersii	M
A1762_1_1	Penicillidia conspicua	F	yes	2018-10-06	Fall	Galeria din Pădure	Mine	A1762	Miniopterus schreibersii	F
A1763_1_1	Penicillidia conspicua	F	yes	2018-10-06	Fall	Galeria din Pădure	Mine	A1763	Miniopterus schreibersii	F
A1764_1_1	Penicillidia conspicua	F	yes	2018-10-06	Fall	Galeria din Pădure	Mine	A1764	Miniopterus schreibersii	F
A1765_1_1	Penicillidia conspicua	M	no	2018-10-06	Fall	Galeria din Pădure	Mine	A1765	Miniopterus schreibersii	M
A1766_1_1	Nycteribia schmidlii	M	no	2018-09-08	Fall	Clădirea Carierei	Building	A1766	Pipistrellus nathusii	M
A1766_1_2	Nycteribia schmidlii	M	no	2018-09-08	Fall	Clădirea Carierei	Building	A1766	Pipistrellus nathusii	M
A1766_2_1	Nycteribia schmidlii	F	yes	2018-09-08	Fall	Clădirea Carierei	Building	A1766	Pipistrellus nathusii	M
A1766_2_2	Nycteribia schmidlii	F	no	2018-09-08	Fall	Clădirea Carierei	Building	A1766	Pipistrellus nathusii	M
A1766_2_3	Nycteribia schmidlii	F	no	2018-09-08	Fall	Clădirea Carierei	Building	A1766	Pipistrellus nathusii	M
A1770_1_1	Nycteribia latreilli	F	no	2018-09-08	Fall	Clădirea Carierei	Building	A1770	Myotis nattereri	F
A1773_1_1	Nycteribia latreilli	M	no	2018-10-05	Fall	Clădirea Carierei	Building	A1773	Pipistrellus nathusii	M
A1773_2_1	Nycteribia latreilli	F	no	2018-10-05	Fall	Clădirea Carierei	Building	A1773	Pipistrellus nathusii	M
A1774_1_1	Penicillidia dufourii	M	no	2018-10-05	Fall	Clădirea Carierei	Building	A1774	Pipistrellus nathusii	M
A1774_2_1	Penicillidia dufourii	F	no	2018-10-05	Fall	Clădirea Carierei	Building	A1774	Pipistrellus nathusii	M
A1775_1_1	Penicillidia dufourii	M	yes	2018-08-30	Fall	Peștera Liliecilor	Cave	A1775	Miniopterus schreibersii	F
A1778_1_1	Penicillidia conspicua	M	yes	2018-08-30	Fall	Peștera Liliecilor	Cave	A1778	Miniopterus schreibersii	M
A1785_1_1	Nycteribia schmidlii	M	no	2018-08-30	Fall	Peștera Liliecilor	Cave	A1785	Miniopterus schreibersii	M
A1788_1_1	Penicillidia conspicua	F	yes	2018-08-30	Fall	Peștera Liliecilor	Cave	A1788	Miniopterus schreibersii	M
A1788_1_2	Penicillidia conspicua	F	yes	2018-08-30	Fall	Peștera Liliecilor	Cave	A1788	Miniopterus schreibersii	M
A1790_1_1	Nycteribia schmidlii	M	no	2018-08-30	Fall	Peștera Liliecilor	Cave	A1790	Miniopterus schreibersii	M
A1791_1_1	Penicillidia dufourii	M	yes	2018-08-30	Fall	Peștera Liliecilor	Cave	A1791	Miniopterus schreibersii	M
A1791_2_1	Nycteribia schmidlii	M	no	2018-08-30	Fall	Peștera Liliecilor	Cave	A1791	Miniopterus schreibersii	M
A1792_1_1	Nycteribia schmidlii	M	no	2018-08-30	Fall	Peștera Liliecilor	Cave	A1792	Miniopterus schreibersii	M
A1792_1_2	Nycteribia schmidlii	M	no	2018-08-30	Fall	Peștera Liliecilor	Cave	A1792	Miniopterus schreibersii	M
A1792_1_3	Nycteribia schmidlii	M	no	2018-08-30	Fall	Peștera Liliecilor	Cave	A1792	Miniopterus schreibersii	M
A1793_1_1	Nycteribia schmidlii	F	no	2018-08-30	Fall	Peștera Liliecilor	Cave	A1793	Miniopterus schreibersii	F
A1793_1_2	Nycteribia schmidlii	F	no	2018-08-30	Fall	Peștera Liliecilor	Cave	A1793	Miniopterus schreibersii	F
A1793_2_1	Penicillidia dufourii	F	yes	2018-08-30	Fall	Peștera Liliecilor	Cave	A1793	Miniopterus schreibersii	F
A1794_1_1	Nycteribia schmidlii	M	no	2018-08-30	Fall	Peștera Liliecilor	Cave	A1794	Miniopterus schreibersii	M
A1794_2_1	Nycteribia schmidlii	F	no	2018-08-30	Fall	Peștera Liliecilor	Cave	A1794	Miniopterus schreibersii	M
A1794_2_2	Nycteribia schmidlii	F	no	2018-08-30	Fall	Peștera Liliecilor	Cave	A1794	Miniopterus schreibersii	M
A1794_2_3	Nycteribia schmidlii	F	no	2018-08-30	Fall	Peștera Liliecilor	Cave	A1794	Miniopterus schreibersii	M
A1797_1_1	Penicillidia conspicua	F	yes	2018-08-30	Fall	Peștera Liliecilor	Cave	A1797	Miniopterus schreibersii	M
A1797_1_2	Penicillidia conspicua	F	no	2018-08-30	Fall	Peștera Liliecilor	Cave	A1797	Miniopterus schreibersii	M
A1797_2_1	Nycteribia schmidlii	M	yes	2018-08-30	Fall	Peștera Liliecilor	Cave	A1797	Miniopterus schreibersii	M
A1798_1_1	Nycteribia schmidlii	M	no	2018-08-30	Fall	Peștera Liliecilor	Cave	A1798	Miniopterus schreibersii	F
A1798_2_1	Nycteribia schmidlii	F	no	2018-08-30	Fall	Peștera Liliecilor	Cave	A1798	Miniopterus schreibersii	F
A1798_3_1	Penicillidia conspicua	M	no	2018-08-30	Fall	Peștera Liliecilor	Cave	A1798	Miniopterus schreibersii	F
A1799_1_1	Penicillidia conspicua	M	yes	2018-08-30	Fall	Peștera Liliecilor	Cave	A1799	Miniopterus schreibersii	F
A1799_2_1	Penicillidia conspicua	F	yes	2018-08-30	Fall	Peștera Liliecilor	Cave	A1799	Miniopterus schreibersii	F
A1802_1_1	Nycteribia schmidlii	F	no	2018-08-30	Fall	Peștera Liliecilor	Cave	A1802	Miniopterus schreibersii	F
A1802_1_2	Nycteribia schmidlii	F	no	2018-08-30	Fall	Peștera Liliecilor	Cave	A1802	Miniopterus schreibersii	F
A1802_2_1	Nycteribia schmidlii	F	no	2018-08-30	Fall	Peștera Liliecilor	Cave	A1802	Miniopterus schreibersii	F
A1803_1_1	Penicillidia dufourii	M	no	2018-08-30	Fall	Peștera Liliecilor	Cave	A1803	Miniopterus schreibersii	F
A1803_1_2	Penicillidia dufourii	M	no	2018-08-30	Fall	Peștera Liliecilor	Cave	A1803	Miniopterus schreibersii	F
A1806_1_1	Penicillidia conspicua	F	yes	2018-08-30	Fall	Peștera Liliecilor	Cave	A1806	Miniopterus schreibersii	F
A1806_2_1	Penicillidia dufourii	M	no	2018-08-30	Fall	Peștera Liliecilor	Cave	A1806	Miniopterus schreibersii	F
A1806_3_1	Nycteribia schmidlii	M	no	2018-08-30	Fall	Peștera Liliecilor	Cave	A1806	Miniopterus schreibersii	F
A1807_1_1	Penicillidia dufourii	M	yes	2018-08-30	Fall	Peștera Liliecilor	Cave	A1807	Myotis blythii	F
A1807_2_1	Penicillidia dufourii	F	no	2018-08-30	Fall	Peștera Liliecilor	Cave	A1807	Myotis blythii	F
A1808_1_1	Penicillidia conspicua	F	yes	2018-08-30	Fall	Peștera Liliecilor	Cave	A1808	Myotis blythii	F
A1810_1_1	Penicillidia dufourii	M	yes	2018-08-30	Fall	Peștera Liliecilor	Cave	A1810	Myotis blythii	F
A1810_1_2	Penicillidia dufourii	M	no	2018-08-30	Fall	Peștera Liliecilor	Cave	A1810	Myotis blythii	F
A1810_2_1	Penicillidia dufourii	F	yes	2018-08-30	Fall	Peștera Liliecilor	Cave	A1810	Myotis blythii	F
A1812_1_1	Penicillidia conspicua	F	no	2018-08-30	Fall	Peștera Liliecilor	Cave	A1812	Myotis blythii	F
A1813_1_1	Penicillidia dufourii	M	no	2018-08-31	Fall	Peștera Liliecilor	Cave	A1813	Myotis blythii	F
A1814_1_1	Nycteribia schmidlii	M	no	2019-05-21	Sprig	Dealul Bechir	Cave	A1814	Plecotus austriacus	M
A1817_1_1	Nycteribia schmidlii	M	no	2019-05-21	Sprig	Dealul Bechir	Cave	A1817	Myotis emarginatus	F
A1818_1_1	Nycteribia schmidlii	F	yes	2019-05-21	Sprig	Dealul Bechir	Cave	A1818	Myotis daubentonii	M
A1819_1_1	Nycteribia schmidlii	F	no	2019-05-21	Sprig	Dealul Bechir	Cave	A1819	Myotis daubentonii	M
A1821_1_1	Penicillidia conspicua	M	yes	2019-05-21	Sprig	Dealul Bechir	Cave	A1821	Eptesicus serotinus	M
A1823_1_1	Nycteribia schmidlii	M	no	2019-05-21	Sprig	Dealul Bechir	Cave	A1823	Myotis daubentonii	M
A1824_1_1	Penicillidia dufourii	M	no	2019-05-21	Sprig	Dealul Bechir	Cave	A1824	Rhinolophus ferrumequinum	M
A1824_2_1	Nycteribia schmidlii	M	no	2019-05-21	Sprig	Dealul Bechir	Cave	A1824	Rhinolophus ferrumequinum	M
A1825_1_1	Penicillidia dufourii	M	yes	2019-05-21	Sprig	Dealul Bechir	Cave	A1825	Barbastella barbastellus	M
A1825_2_1	Penicillidia conspicua	F	yes	2019-05-21	Sprig	Dealul Bechir	Cave	A1825	Barbastella barbastellus	M
A1826_1_1	Penicillidia conspicua	F	no	2019-05-21	Sprig	Dealul Bechir	Cave	A1826	Rhinolophus ferrumequinum	M
A1827_1_1	Penicillidia conspicua	M	no	2019-05-21	Sprig	Dealul Bechir	Cave	A1827	Rhinolophus ferrumequinum	F
A1828_1_1	Nycteribia schmidlii	M	no	2019-05-21	Sprig	Dealul Bechir	Cave	A1828	Rhinolophus ferrumequinum	M
A1828_2_1	Nycteribia schmidlii	F	no	2019-05-21	Sprig	Dealul Bechir	Cave	A1828	Rhinolophus ferrumequinum	M
A1828_2_2	Nycteribia schmidlii	F	no	2019-05-21	Sprig	Dealul Bechir	Cave	A1828	Rhinolophus ferrumequinum	M
A1829_1_1	Penicillidia conspicua	F	no	2019-05-21	Sprig	Dealul Bechir	Cave	A1829	Myotis bechsteinii	M
A1830_1_1	Nycteribia schmidlii	M	no	2019-05-21	Sprig	Dealul Bechir	Cave	A1830	Rhinolophus ferrumequinum	M
A1830_2_1	Nycteribia schmidlii	F	no	2019-05-21	Sprig	Dealul Bechir	Cave	A1830	Rhinolophus ferrumequinum	M
A1831_1_1	Nycteribia schmidlii	F	no	2019-05-21	Sprig	Dealul Bechir	Cave	A1831	Eptesicus serotinus	M
A1832_1_1	Penicillidia dufourii	M	yes	2019-05-21	Sprig	Dealul Bechir	Cave	A1832	Myotis emarginatus	M
A1833_1_1	Nycteribia schmidlii	F	yes	2019-05-21	Sprig	Dealul Bechir	Cave	A1833	Rhinolophus ferrumequinum	F
A1835_1_1	Nycteribia schmidlii	M	no	2019-05-21	Sprig	Dealul Bechir	Cave	A1835	Myotis daubentonii	M
A1837_1_1	Nycteribia schmidlii	M	no	2019-05-21	Sprig	Dealul Bechir	Cave	A1837	Rhinolophus ferrumequinum	M
A1837_2_1	Nycteribia schmidlii	F	yes	2019-05-21	Sprig	Dealul Bechir	Cave	A1837	Rhinolophus ferrumequinum	M
A1837_3_1	Penicillidia conspicua	M	yes	2019-05-21	Sprig	Dealul Bechir	Cave	A1837	Rhinolophus ferrumequinum	M
A1841_1_1	Penicillidia dufourii	M	no	2019-05-21	Sprig	Dealul Bechir	Cave	A1841	Plecotus austriacus	M
A1841_2_1	Penicillidia dufourii	F	yes	2019-05-21	Sprig	Dealul Bechir	Cave	A1841	Plecotus austriacus	M
A1843_1_1	Nycteribia schmidlii	M	no	2019-05-21	Sprig	Dealul Bechir	Cave	A1843	Rhinolophus ferrumequinum	F
A1851_1_1	Penicillidia dufourii	M	no	2019-05-24	Sprig	Peștera Liliecilor	Cave	A1851	Miniopterus schreibersii	M
A1854_1_1	Nycteribia schmidlii	F	no	2019-05-24	Sprig	Peștera Liliecilor	Cave	A1854	Miniopterus schreibersii	F
A1854_1_2	Nycteribia schmidlii	F	no	2019-05-24	Sprig	Peștera Liliecilor	Cave	A1854	Miniopterus schreibersii	F
A1855_1_1	Nycteribia schmidlii	F	no	2019-05-24	Sprig	Peștera Liliecilor	Cave	A1855	Miniopterus schreibersii	F
A1858_1_1	Penicillidia dufourii	M	no	2019-05-24	Sprig	Peștera Liliecilor	Cave	A1858	Miniopterus schreibersii	F
A1867_1_1	Penicillidia dufourii	M	no	2019-05-24	Sprig	Peștera Liliecilor	Cave	A1867	Miniopterus schreibersii	M
A1867_2_1	Penicillidia dufourii	F	no	2019-05-24	Sprig	Peștera Liliecilor	Cave	A1867	Miniopterus schreibersii	M
A1868_1_1	Penicillidia conspicua	F	no	2019-05-24	Sprig	Peștera Liliecilor	Cave	A1868	Miniopterus schreibersii	F
A1870_1_1	Penicillidia dufourii	M	no	2019-05-24	Sprig	Peștera Liliecilor	Cave	A1870	Myotis daubentonii	M
A1870_2_1	Penicillidia dufourii	F	no	2019-05-24	Sprig	Peștera Liliecilor	Cave	A1870	Myotis daubentonii	M
A1873_1_1	Penicillidia dufourii	M	no	2019-05-24	Sprig	Peștera Liliecilor	Cave	A1873	Myotis daubentonii	M
A1873_1_2	Penicillidia dufourii	M	no	2019-05-24	Sprig	Peștera Liliecilor	Cave	A1873	Myotis daubentonii	M
A1874_1_1	Penicillidia dufourii	F	no	2019-05-24	Sprig	Peștera Liliecilor	Cave	A1874	Myotis blythii	M
A1875_1_1	Penicillidia dufourii	M	no	2019-05-24	Sprig	Peștera Liliecilor	Cave	A1875	Myotis blythii	F
A1875_1_2	Penicillidia dufourii	M	no	2019-05-24	Sprig	Peștera Liliecilor	Cave	A1875	Myotis blythii	F
A1878_1_1	Penicillidia dufourii	M	no	2019-05-24	Sprig	Peștera Liliecilor	Cave	A1878	Myotis daubentonii	M
A1879_1_1	Penicillidia dufourii	F	no	2019-05-24	Sprig	Peștera Liliecilor	Cave	A1879	Myotis daubentonii	M
A1880_1_1	Penicillidia dufourii	F	no	2019-05-24	Sprig	Peștera Liliecilor	Cave	A1880	Eptesicus serotinus	M
A1883_1_1	Nycteribia vexata	M	no	2019-05-24	Sprig	Peștera Liliecilor	Cave	A1883	Myotis blythii	F
A1883_1_2	Nycteribia vexata	M	no	2019-05-24	Sprig	Peștera Liliecilor	Cave	A1883	Myotis blythii	F
A1883_2_1	Nycteribia vexata	F	no	2019-05-24	Sprig	Peștera Liliecilor	Cave	A1883	Myotis blythii	F
A1883_3_1	Penicillidia dufourii	M	no	2019-05-24	Sprig	Peștera Liliecilor	Cave	A1883	Myotis blythii	F
A1883_4_1	Penicillidia dufourii	F	no	2019-05-24	Sprig	Peștera Liliecilor	Cave	A1883	Myotis blythii	F
A1885_1_1	Nycteribia latreilli	M	no	2019-05-25	Sprig	Cariera Sitorman	Open	A1885	Plecotus austriacus	F
A1886_1_1	Nycteribia schmidlii	M	no	2019-05-25	Sprig	Cariera Sitorman	Open	A1886	Myotis daubentonii	F
A1886_1_2	Nycteribia schmidlii	M	no	2019-05-25	Sprig	Cariera Sitorman	Open	A1886	Myotis daubentonii	F
A1886_2_1	Nycteribia schmidlii	F	no	2019-05-25	Sprig	Cariera Sitorman	Open	A1886	Myotis daubentonii	F
A1887_1_1	Nycteribia schmidlii	F	no	2019-05-27	Sprig	Buncar militar	Cave	A1887	Miniopterus schreibersii	F
A1901_1_1	Penicillidia dufourii	M	no	2019-05-27	Sprig	Buncar militar	Cave	A1901	Miniopterus schreibersii	F
A1905_1_1	Phthiridium biarticulatum	F	no	2019-05-27	Sprig	Buncar militar	Cave	A1905	Miniopterus schreibersii	M
A1905_1_2	Phthiridium biarticulatum	F	no	2019-05-27	Sprig	Buncar militar	Cave	A1905	Miniopterus schreibersii	M
A1910_1_1	Penicillidia dufourii	F	yes	2019-05-27	Sprig	Buncar militar	Cave	A1910	Miniopterus schreibersii	M
A1912_1_1	Nycteribia schmidlii	F	no	2019-05-27	Sprig	Buncar militar	Cave	A1912	Miniopterus schreibersii	F
A1928_1_1	Phthiridium biarticulatum	M	no	2019-05-27	Sprig	Buncar militar	Cave	A1928	Miniopterus schreibersii	F
A1928_2_1	Phthiridium biarticulatum	F	no	2019-05-27	Sprig	Buncar militar	Cave	A1928	Miniopterus schreibersii	F
A1928_2_2	Phthiridium biarticulatum	F	no	2019-05-27	Sprig	Buncar militar	Cave	A1928	Miniopterus schreibersii	F
A1928_2_3	Phthiridium biarticulatum	F	no	2019-05-27	Sprig	Buncar militar	Cave	A1928	Miniopterus schreibersii	F
A1937_1_1	Penicillidia dufourii	M	no	2019-05-27	Sprig	Buncar militar	Cave	A1937	Miniopterus schreibersii	F
A1937_2_1	Penicillidia dufourii	F	no	2019-05-27	Sprig	Buncar militar	Cave	A1937	Miniopterus schreibersii	F
A2041_1_1	Nycteribia vexata	F	no	2019-06-07	Sprig	Avenul Betfia	Cave	A2041	Myotis myotis	F
A2042_1_1	Penicillidia dufourii	F	no	2019-06-07	Sprig	Avenul Betfia	Cave	A2042	Myotis myotis	F
A2043_1_1	Nycteribia latreilli	M	no	2019-06-07	Sprig	Avenul Betfia	Cave	A2043	Myotis blythii	F
A2043_1_2	Nycteribia latreilli	M	no	2019-06-07	Sprig	Avenul Betfia	Cave	A2043	Myotis blythii	F
A2043_2_1	Nycteribia latreilli	F	no	2019-06-07	Sprig	Avenul Betfia	Cave	A2043	Myotis blythii	F
A2043_2_2	Nycteribia latreilli	F	no	2019-06-07	Sprig	Avenul Betfia	Cave	A2043	Myotis blythii	F
A2043_3_1	Penicillidia dufourii	M	no	2019-06-07	Sprig	Avenul Betfia	Cave	A2043	Myotis blythii	F
A2044_1_1	Nycteribia vexata	M	no	2019-06-07	Sprig	Avenul Betfia	Cave	A2044	Myotis myotis	F
A2044_2_1	Nycteribia vexata	F	no	2019-06-07	Sprig	Avenul Betfia	Cave	A2044	Myotis myotis	F
A2044_3_1	Penicillidia dufourii	F	no	2019-06-07	Sprig	Avenul Betfia	Cave	A2044	Myotis myotis	F
A2045_1_1	Nycteribia vexata	M	no	2019-06-07	Sprig	Avenul Betfia	Cave	A2045	Myotis myotis	F
A2045_1_2	Nycteribia vexata	M	no	2019-06-07	Sprig	Avenul Betfia	Cave	A2045	Myotis myotis	F
A2045_2_1	Nycteribia vexata	F	no	2019-06-07	Sprig	Avenul Betfia	Cave	A2045	Myotis myotis	F
A2045_3_1	Nycteribia latreilli	M	no	2019-06-07	Sprig	Avenul Betfia	Cave	A2045	Myotis myotis	F
A2046_1_1	Nycteribia vexata	M	no	2019-06-07	Sprig	Avenul Betfia	Cave	A2046	Myotis myotis	F
A2046_2_1	Nycteribia vexata	F	no	2019-06-07	Sprig	Avenul Betfia	Cave	A2046	Myotis myotis	F
A2046_3_1	Nycteribia latreilli	M	no	2019-06-07	Sprig	Avenul Betfia	Cave	A2046	Myotis myotis	F
A2046_4_1	Penicillidia dufourii	M	no	2019-06-07	Sprig	Avenul Betfia	Cave	A2046	Myotis myotis	F
A2047_1_1	Nycteribia vexata	M	no	2019-06-07	Sprig	Avenul Betfia	Cave	A2047	Myotis myotis	F
A2047_1_2	Nycteribia vexata	M	no	2019-06-07	Sprig	Avenul Betfia	Cave	A2047	Myotis myotis	F
A2047_2_1	Nycteribia vexata	F	no	2019-06-07	Sprig	Avenul Betfia	Cave	A2047	Myotis myotis	F
A2047_2_2	Nycteribia vexata	F	no	2019-06-07	Sprig	Avenul Betfia	Cave	A2047	Myotis myotis	F
A2047_3_1	Nycteribia latreilli	M	no	2019-06-07	Sprig	Avenul Betfia	Cave	A2047	Myotis myotis	F
A2047_4_1	Penicillidia dufourii	F	no	2019-06-07	Sprig	Avenul Betfia	Cave	A2047	Myotis myotis	F
A2048_1_1	Nycteribia vexata	M	no	2019-06-07	Sprig	Avenul Betfia	Cave	A2048	Myotis myotis	F
A2048_2_1	Nycteribia vexata	F	no	2019-06-07	Sprig	Avenul Betfia	Cave	A2048	Myotis myotis	F
A2048_2_2	Nycteribia vexata	F	no	2019-06-07	Sprig	Avenul Betfia	Cave	A2048	Myotis myotis	F
A2048_2_3	Nycteribia vexata	F	no	2019-06-07	Sprig	Avenul Betfia	Cave	A2048	Myotis myotis	F
A2048_2_4	Nycteribia vexata	F	no	2019-06-07	Sprig	Avenul Betfia	Cave	A2048	Myotis myotis	F
A2048_3_1	Nycteribia latreilli	F	no	2019-06-07	Sprig	Avenul Betfia	Cave	A2048	Myotis myotis	F
A2048_3_2	Nycteribia latreilli	F	no	2019-06-07	Sprig	Avenul Betfia	Cave	A2048	Myotis myotis	F
A2048_3_3	Nycteribia latreilli	F	no	2019-06-07	Sprig	Avenul Betfia	Cave	A2048	Myotis myotis	F
A2049_1_1	Nycteribia vexata	F	no	2019-06-07	Sprig	Avenul Betfia	Cave	A2049	Myotis myotis	F
A2049_1_2	Nycteribia vexata	F	no	2019-06-07	Sprig	Avenul Betfia	Cave	A2049	Myotis myotis	F
A2049_1_3	Nycteribia vexata	F	no	2019-06-07	Sprig	Avenul Betfia	Cave	A2049	Myotis myotis	F
A2049_2_1	Nycteribia latreilli	F	no	2019-06-07	Sprig	Avenul Betfia	Cave	A2049	Myotis myotis	F
A2049_2_2	Nycteribia latreilli	F	no	2019-06-07	Sprig	Avenul Betfia	Cave	A2049	Myotis myotis	F
A2050_1_1	Nycteribia latreilli	M	no	2019-06-07	Sprig	Avenul Betfia	Cave	A2050	Myotis myotis	F
A2050_1_2	Nycteribia latreilli	M	no	2019-06-07	Sprig	Avenul Betfia	Cave	A2050	Myotis myotis	F
A2050_2_1	Nycteribia latreilli	F	no	2019-06-07	Sprig	Avenul Betfia	Cave	A2050	Myotis myotis	F
A2050_3_1	Nycteribia vexata	M	no	2019-06-07	Sprig	Avenul Betfia	Cave	A2050	Myotis myotis	F
A2050_4_1	Nycteribia vexata	F	no	2019-06-07	Sprig	Avenul Betfia	Cave	A2050	Myotis myotis	F
A2050_4_2	Nycteribia vexata	F	no	2019-06-07	Sprig	Avenul Betfia	Cave	A2050	Myotis myotis	F
A2051_1_1	Nycteribia vexata	M	no	2019-06-07	Sprig	Avenul Betfia	Cave	A2051	Myotis myotis	F
A2051_1_2	Nycteribia vexata	M	no	2019-06-07	Sprig	Avenul Betfia	Cave	A2051	Myotis myotis	F
A2051_2_1	Nycteribia vexata	F	no	2019-06-07	Sprig	Avenul Betfia	Cave	A2051	Myotis myotis	F
A2051_2_2	Nycteribia vexata	F	no	2019-06-07	Sprig	Avenul Betfia	Cave	A2051	Myotis myotis	F
A2051_3_1	Penicillidia dufourii	F	no	2019-06-07	Sprig	Avenul Betfia	Cave	A2051	Myotis myotis	F
A2052_1_1	Nycteribia vexata	M	no	2019-06-07	Sprig	Avenul Betfia	Cave	A2052	Myotis blythii	F
A2053_1_1	Nycteribia vexata	M	no	2019-06-07	Sprig	Avenul Betfia	Cave	A2053	Myotis myotis	F
A2053_1_2	Nycteribia vexata	M	no	2019-06-07	Sprig	Avenul Betfia	Cave	A2053	Myotis myotis	F
A2053_1_3	Nycteribia vexata	M	no	2019-06-07	Sprig	Avenul Betfia	Cave	A2053	Myotis myotis	F
A2053_1_4	Nycteribia vexata	M	no	2019-06-07	Sprig	Avenul Betfia	Cave	A2053	Myotis myotis	F
A2053_1_5	Nycteribia vexata	M	no	2019-06-07	Sprig	Avenul Betfia	Cave	A2053	Myotis myotis	F
A2053_2_1	Nycteribia vexata	F	no	2019-06-07	Sprig	Avenul Betfia	Cave	A2053	Myotis myotis	F
A2053_2_2	Nycteribia vexata	F	no	2019-06-07	Sprig	Avenul Betfia	Cave	A2053	Myotis myotis	F
A2053_2_3	Nycteribia vexata	F	no	2019-06-07	Sprig	Avenul Betfia	Cave	A2053	Myotis myotis	F
A2053_3_1	Nycteribia latreilli	M	no	2019-06-07	Sprig	Avenul Betfia	Cave	A2053	Myotis myotis	F
A2053_4_1	Nycteribia latreilli	F	no	2019-06-07	Sprig	Avenul Betfia	Cave	A2053	Myotis myotis	F
A2054_1_1	Nycteribia latreilli	M	no	2019-06-07	Sprig	Avenul Betfia	Cave	A2054	Myotis myotis	F
A2054_2_1	Nycteribia latreilli	F	no	2019-06-07	Sprig	Avenul Betfia	Cave	A2054	Myotis myotis	F
A2054_2_2	Nycteribia latreilli	F	no	2019-06-07	Sprig	Avenul Betfia	Cave	A2054	Myotis myotis	F
A2054_3_1	Nycteribia vexata	M	no	2019-06-07	Sprig	Avenul Betfia	Cave	A2054	Myotis myotis	F
A2055_1_1	Nycteribia latreilli	M	no	2019-06-07	Sprig	Avenul Betfia	Cave	A2055	Myotis myotis	F
A2055_1_2	Nycteribia latreilli	M	no	2019-06-07	Sprig	Avenul Betfia	Cave	A2055	Myotis myotis	F
A2055_1_3	Nycteribia latreilli	M	no	2019-06-07	Sprig	Avenul Betfia	Cave	A2055	Myotis myotis	F
A2055_1_4	Nycteribia latreilli	M	no	2019-06-07	Sprig	Avenul Betfia	Cave	A2055	Myotis myotis	F
A2055_2_1	Nycteribia latreilli	F	no	2019-06-07	Sprig	Avenul Betfia	Cave	A2055	Myotis myotis	F
A2055_2_2	Nycteribia latreilli	F	no	2019-06-07	Sprig	Avenul Betfia	Cave	A2055	Myotis myotis	F
A2055_3_1	Nycteribia vexata	M	no	2019-06-07	Sprig	Avenul Betfia	Cave	A2055	Myotis myotis	F
A2055_4_1	Nycteribia vexata	F	no	2019-06-07	Sprig	Avenul Betfia	Cave	A2055	Myotis myotis	F
A2055_4_2	Nycteribia vexata	F	no	2019-06-07	Sprig	Avenul Betfia	Cave	A2055	Myotis myotis	F
A2055_4_3	Nycteribia vexata	F	no	2019-06-07	Sprig	Avenul Betfia	Cave	A2055	Myotis myotis	F
A2055_4_4	Nycteribia vexata	F	no	2019-06-07	Sprig	Avenul Betfia	Cave	A2055	Myotis myotis	F
A2055_4_5	Nycteribia vexata	F	no	2019-06-07	Sprig	Avenul Betfia	Cave	A2055	Myotis myotis	F
A2056_1_1	Penicillidia dufourii	M	no	2019-06-07	Sprig	Avenul Betfia	Cave	A2056	Myotis myotis	F
A2056_2_1	Nycteribia latreilli	M	no	2019-06-07	Sprig	Avenul Betfia	Cave	A2056	Myotis myotis	F
A2056_3_1	Nycteribia vexata	M	no	2019-06-07	Sprig	Avenul Betfia	Cave	A2056	Myotis myotis	F
A2057_1_1	Nycteribia latreilli	M	no	2019-06-07	Sprig	Avenul Betfia	Cave	A2057	Myotis blythii	F
A2057_2_1	Nycteribia latreilli	F	no	2019-06-07	Sprig	Avenul Betfia	Cave	A2057	Myotis blythii	F
A2057_2_2	Nycteribia latreilli	F	no	2019-06-07	Sprig	Avenul Betfia	Cave	A2057	Myotis blythii	F
A2057_2_3	Nycteribia latreilli	F	no	2019-06-07	Sprig	Avenul Betfia	Cave	A2057	Myotis blythii	F
A2057_3_1	Nycteribia vexata	M	no	2019-06-07	Sprig	Avenul Betfia	Cave	A2057	Myotis blythii	F
A2059_1_1	Nycteribia latreilli	M	no	2019-06-07	Sprig	Avenul Betfia	Cave	A2059	Myotis myotis	F
A2059_2_1	Nycteribia vexata	F	no	2019-06-07	Sprig	Avenul Betfia	Cave	A2059	Myotis myotis	F
A2061_1_1	Nycteribia vexata	M	no	2019-06-07	Sprig	Avenul Betfia	Cave	A2061	Myotis myotis	F
A2061_1_2	Nycteribia vexata	M	no	2019-06-07	Sprig	Avenul Betfia	Cave	A2061	Myotis myotis	F
A2061_1_3	Nycteribia vexata	M	no	2019-06-07	Sprig	Avenul Betfia	Cave	A2061	Myotis myotis	F
A2061_1_4	Nycteribia vexata	M	no	2019-06-07	Sprig	Avenul Betfia	Cave	A2061	Myotis myotis	F
A2061_1_5	Nycteribia vexata	M	no	2019-06-07	Sprig	Avenul Betfia	Cave	A2061	Myotis myotis	F
A2061_2_1	Nycteribia vexata	F	yes	2019-06-07	Sprig	Avenul Betfia	Cave	A2061	Myotis myotis	F
A2061_2_2	Nycteribia vexata	F	yes	2019-06-07	Sprig	Avenul Betfia	Cave	A2061	Myotis myotis	F
A2061_2_3	Nycteribia vexata	F	no	2019-06-07	Sprig	Avenul Betfia	Cave	A2061	Myotis myotis	F
A2061_2_4	Nycteribia vexata	F	no	2019-06-07	Sprig	Avenul Betfia	Cave	A2061	Myotis myotis	F
A2061_3_1	Nycteribia latreilli	M	no	2019-06-07	Sprig	Avenul Betfia	Cave	A2061	Myotis myotis	F
A2061_3_2	Nycteribia latreilli	M	no	2019-06-07	Sprig	Avenul Betfia	Cave	A2061	Myotis myotis	F
A2061_3_3	Nycteribia latreilli	M	no	2019-06-07	Sprig	Avenul Betfia	Cave	A2061	Myotis myotis	F
A2061_3_4	Nycteribia latreilli	M	no	2019-06-07	Sprig	Avenul Betfia	Cave	A2061	Myotis myotis	F
A2061_4_1	Nycteribia latreilli	F	no	2019-06-07	Sprig	Avenul Betfia	Cave	A2061	Myotis myotis	F
A2062_1_1	Nycteribia schmidlii	F	no	2019-06-07	Sprig	Avenul Betfia	Cave	A2062	Miniopterus schreibersii	F
A2063_1_1	Nycteribia vexata	M	no	2019-06-07	Sprig	Avenul Betfia	Cave	A2063	Myotis myotis	F
A2063_2_1	Nycteribia vexata	F	yes	2019-06-07	Sprig	Avenul Betfia	Cave	A2063	Myotis myotis	F
A2063_2_2	Nycteribia vexata	F	no	2019-06-07	Sprig	Avenul Betfia	Cave	A2063	Myotis myotis	F
A2063_2_3	Nycteribia vexata	F	no	2019-06-07	Sprig	Avenul Betfia	Cave	A2063	Myotis myotis	F
A2063_3_1	Nycteribia latreilli	M	no	2019-06-07	Sprig	Avenul Betfia	Cave	A2063	Myotis myotis	F
A2065_1_1	Nycteribia schmidlii	M	no	2019-06-07	Sprig	Avenul Betfia	Cave	A2065	Miniopterus schreibersii	F
A2065_1_2	Nycteribia schmidlii	M	no	2019-06-07	Sprig	Avenul Betfia	Cave	A2065	Miniopterus schreibersii	F
A2065_2_1	Nycteribia schmidlii	F	no	2019-06-07	Sprig	Avenul Betfia	Cave	A2065	Miniopterus schreibersii	F
A2065_2_2	Nycteribia schmidlii	F	no	2019-06-07	Sprig	Avenul Betfia	Cave	A2065	Miniopterus schreibersii	F
A2066_1_1	Nycteribia vexata	M	no	2019-06-07	Sprig	Avenul Betfia	Cave	A2066	Myotis myotis	F
A2066_1_2	Nycteribia vexata	M	no	2019-06-07	Sprig	Avenul Betfia	Cave	A2066	Myotis myotis	F
A2066_2_1	Nycteribia vexata	F	yes	2019-06-07	Sprig	Avenul Betfia	Cave	A2066	Myotis myotis	F
A2066_2_2	Nycteribia vexata	F	no	2019-06-07	Sprig	Avenul Betfia	Cave	A2066	Myotis myotis	F
A2066_2_3	Nycteribia vexata	F	no	2019-06-07	Sprig	Avenul Betfia	Cave	A2066	Myotis myotis	F
A2066_3_1	Nycteribia latreilli	M	no	2019-06-07	Sprig	Avenul Betfia	Cave	A2066	Myotis myotis	F
A2066_4_1	Nycteribia latreilli	F	no	2019-06-07	Sprig	Avenul Betfia	Cave	A2066	Myotis myotis	F
A2067_1_1	Nycteribia latreilli	M	no	2019-06-07	Sprig	Avenul Betfia	Cave	A2067	Myotis myotis	F
A2067_1_2	Nycteribia latreilli	M	no	2019-06-07	Sprig	Avenul Betfia	Cave	A2067	Myotis myotis	F
A2067_1_3	Nycteribia latreilli	M	no	2019-06-07	Sprig	Avenul Betfia	Cave	A2067	Myotis myotis	F
A2067_1_4	Nycteribia latreilli	M	no	2019-06-07	Sprig	Avenul Betfia	Cave	A2067	Myotis myotis	F
A2067_1_5	Nycteribia latreilli	M	no	2019-06-07	Sprig	Avenul Betfia	Cave	A2067	Myotis myotis	F
A2067_2_1	Nycteribia vexata	M	no	2019-06-07	Sprig	Avenul Betfia	Cave	A2067	Myotis myotis	F
A2067_3_1	Penicillidia dufourii	F	yes	2019-06-07	Sprig	Avenul Betfia	Cave	A2067	Myotis myotis	F
A2067_3_2	Penicillidia dufourii	F	no	2019-06-07	Sprig	Avenul Betfia	Cave	A2067	Myotis myotis	F
A2068_1_1	Nycteribia vexata	M	no	2019-06-07	Sprig	Avenul Betfia	Cave	A2068	Myotis myotis	F
A2068_1_2	Nycteribia vexata	M	no	2019-06-07	Sprig	Avenul Betfia	Cave	A2068	Myotis myotis	F
A2068_2_1	Nycteribia vexata	F	no	2019-06-07	Sprig	Avenul Betfia	Cave	A2068	Myotis myotis	F
A2068_2_2	Nycteribia vexata	F	no	2019-06-07	Sprig	Avenul Betfia	Cave	A2068	Myotis myotis	F
A2068_2_3	Nycteribia vexata	F	no	2019-06-07	Sprig	Avenul Betfia	Cave	A2068	Myotis myotis	F
A2068_3_1	Nycteribia latreilli	M	no	2019-06-07	Sprig	Avenul Betfia	Cave	A2068	Myotis myotis	F
A2068_4_1	Nycteribia latreilli	F	no	2019-06-07	Sprig	Avenul Betfia	Cave	A2068	Myotis myotis	F
A2068_4_2	Nycteribia latreilli	F	no	2019-06-07	Sprig	Avenul Betfia	Cave	A2068	Myotis myotis	F
A2069_1_1	Nycteribia schmidlii	F	no	2019-06-07	Sprig	Avenul Betfia	Cave	A2069	Miniopterus schreibersii	F
A2071_1_1	Penicillidia conspicua	F	no	2019-06-07	Sprig	Avenul Betfia	Cave	A2071	Miniopterus schreibersii	M
A2072_1_1	Penicillidia dufourii	M	yes	2019-06-07	Sprig	Avenul Betfia	Cave	A2072	Miniopterus schreibersii	F
A2072_2_1	Nycteribia schmidlii	F	no	2019-06-07	Sprig	Avenul Betfia	Cave	A2072	Miniopterus schreibersii	F
A2073_1_1	Nycteribia latreilli	F	no	2019-06-07	Sprig	Avenul Betfia	Cave	A2073	Miniopterus schreibersii	F
A2074_1_1	Penicillidia conspicua	F	no	2019-06-07	Sprig	Avenul Betfia	Cave	A2074	Miniopterus schreibersii	F
A2076_1_1	Penicillidia conspicua	F	no	2019-06-07	Sprig	Avenul Betfia	Cave	A2076	Miniopterus schreibersii	F
A2078_1_1	Nycteribia schmidlii	M	no	2019-06-07	Sprig	Avenul Betfia	Cave	A2078	Miniopterus schreibersii	F
A2078_2_1	Nycteribia schmidlii	F	no	2019-06-07	Sprig	Avenul Betfia	Cave	A2078	Miniopterus schreibersii	F
A2078_2_2	Nycteribia schmidlii	F	no	2019-06-07	Sprig	Avenul Betfia	Cave	A2078	Miniopterus schreibersii	F
A2078_2_3	Nycteribia schmidlii	F	no	2019-06-07	Sprig	Avenul Betfia	Cave	A2078	Miniopterus schreibersii	F
A2079_1_1	Penicillidia conspicua	M	yes	2019-06-07	Sprig	Avenul Betfia	Cave	A2079	Miniopterus schreibersii	M
A2079_1_2	Penicillidia conspicua	M	no	2019-06-07	Sprig	Avenul Betfia	Cave	A2079	Miniopterus schreibersii	M
A2080_1_1	Penicillidia dufourii	F	yes	2019-06-07	Sprig	Avenul Betfia	Cave	A2080	Miniopterus schreibersii	F
A2080_1_2	Penicillidia dufourii	F	yes	2019-06-07	Sprig	Avenul Betfia	Cave	A2080	Miniopterus schreibersii	F
A2080_2_1	Nycteribia schmidlii	F	no	2019-06-07	Sprig	Avenul Betfia	Cave	A2080	Miniopterus schreibersii	F
A2080_2_2	Nycteribia schmidlii	F	no	2019-06-07	Sprig	Avenul Betfia	Cave	A2080	Miniopterus schreibersii	F
A2081_1_1	Nycteribia schmidlii	M	no	2019-06-07	Sprig	Avenul Betfia	Cave	A2081	Miniopterus schreibersii	M
A2081_2_1	Nycteribia schmidlii	F	no	2019-06-07	Sprig	Avenul Betfia	Cave	A2081	Miniopterus schreibersii	M
A2081_2_2	Nycteribia schmidlii	F	no	2019-06-07	Sprig	Avenul Betfia	Cave	A2081	Miniopterus schreibersii	M
A2084_1_1	Penicillidia conspicua	M	yes	2019-06-07	Sprig	Avenul Betfia	Cave	A2084	Miniopterus schreibersii	M
A2084_2_1	Penicillidia conspicua	F	no	2019-06-07	Sprig	Avenul Betfia	Cave	A2084	Miniopterus schreibersii	M
A2086_1_1	Nycteribia schmidlii	F	no	2019-06-08	Sprig	Pivnita de Vin	Mine	A2086	Miniopterus schreibersii	F
A2087_1_1	Nycteribia schmidlii	M	no	2019-06-08	Sprig	Pivnita de Vin	Mine	A2087	Miniopterus schreibersii	M
A2088_1_1	Penicillidia conspicua	F	yes	2019-06-08	Sprig	Pivnita de Vin	Mine	A2088	Miniopterus schreibersii	M
A2091_1_1	Penicillidia dufourii	M	no	2019-06-08	Sprig	Pivnita de Vin	Mine	A2091	Miniopterus schreibersii	M
A2091_2_1	Penicillidia dufourii	F	yes	2019-06-08	Sprig	Pivnita de Vin	Mine	A2091	Miniopterus schreibersii	M
A2092_1_1	Penicillidia conspicua	M	yes	2019-06-08	Sprig	Pivnita de Vin	Mine	A2092	Miniopterus schreibersii	M
A2092_2_1	Nycteribia latreilli	F	no	2019-06-08	Sprig	Pivnita de Vin	Mine	A2092	Miniopterus schreibersii	M
A2094_1_1	Penicillidia conspicua	F	yes	2019-06-08	Sprig	Pivnita de Vin	Mine	A2094	Miniopterus schreibersii	M
A2094_2_1	Nycteribia schmidlii	F	no	2019-06-08	Sprig	Pivnita de Vin	Mine	A2094	Miniopterus schreibersii	M
A2096_1_1	Nycteribia schmidlii	M	no	2019-06-08	Sprig	Pivnita de Vin	Mine	A2096	Miniopterus schreibersii	M
A2097_1_1	Nycteribia schmidlii	M	no	2019-06-08	Sprig	Pivnita de Vin	Mine	A2097	Miniopterus schreibersii	F
A2097_2_1	Penicillidia dufourii	F	yes	2019-06-08	Sprig	Pivnita de Vin	Mine	A2097	Miniopterus schreibersii	F
A2098_1_1	Nycteribia schmidlii	F	no	2019-06-08	Sprig	Pivnita de Vin	Mine	A2098	Miniopterus schreibersii	F
A2098_1_2	Nycteribia schmidlii	F	no	2019-06-08	Sprig	Pivnita de Vin	Mine	A2098	Miniopterus schreibersii	F
A2100_1_1	Nycteribia schmidlii	M	no	2019-06-08	Sprig	Pivnita de Vin	Mine	A2100	Miniopterus schreibersii	F
A2100_2_1	Nycteribia schmidlii	F	no	2019-06-08	Sprig	Pivnita de Vin	Mine	A2100	Miniopterus schreibersii	F
A2100_3_1	Penicillidia conspicua	M	yes	2019-06-08	Sprig	Pivnita de Vin	Mine	A2100	Miniopterus schreibersii	F
A2100_4_1	Penicillidia dufourii	F	yes	2019-06-08	Sprig	Pivnita de Vin	Mine	A2100	Miniopterus schreibersii	F
A2101_1_1	Nycteribia schmidlii	M	yes	2019-06-08	Sprig	Pivnita de Vin	Mine	A2101	Miniopterus schreibersii	F
A2101_2_1	Nycteribia schmidlii	F	no	2019-06-08	Sprig	Pivnita de Vin	Mine	A2101	Miniopterus schreibersii	F
A2103_1_1	Nycteribia schmidlii	M	no	2019-06-08	Sprig	Pivnita de Vin	Mine	A2103	Miniopterus schreibersii	F
A2103_2_1	Nycteribia schmidlii	F	no	2019-06-08	Sprig	Pivnita de Vin	Mine	A2103	Miniopterus schreibersii	F
A2103_3_1	Penicillidia conspicua	F	no	2019-06-08	Sprig	Pivnita de Vin	Mine	A2103	Miniopterus schreibersii	F
A2104_1_1	Nycteribia schmidlii	M	no	2019-06-08	Sprig	Pivnita de Vin	Mine	A2104	Miniopterus schreibersii	F
A2104_1_2	Nycteribia schmidlii	M	no	2019-06-08	Sprig	Pivnita de Vin	Mine	A2104	Miniopterus schreibersii	F
A2104_2_1	Nycteribia schmidlii	F	no	2019-06-08	Sprig	Pivnita de Vin	Mine	A2104	Miniopterus schreibersii	F
A2104_2_2	Nycteribia schmidlii	F	no	2019-06-08	Sprig	Pivnita de Vin	Mine	A2104	Miniopterus schreibersii	F
A2104_2_3	Nycteribia schmidlii	F	no	2019-06-08	Sprig	Pivnita de Vin	Mine	A2104	Miniopterus schreibersii	F
A2104_2_4	Nycteribia schmidlii	F	no	2019-06-08	Sprig	Pivnita de Vin	Mine	A2104	Miniopterus schreibersii	F
A2104_2_5	Nycteribia schmidlii	F	no	2019-06-08	Sprig	Pivnita de Vin	Mine	A2104	Miniopterus schreibersii	F
A2104_3_1	Penicillidia dufourii	M	yes	2019-06-08	Sprig	Pivnita de Vin	Mine	A2104	Miniopterus schreibersii	F
A2104_4_1	Penicillidia dufourii	F	yes	2019-06-08	Sprig	Pivnita de Vin	Mine	A2104	Miniopterus schreibersii	F
A2104_5_1	Penicillidia conspicua	F	yes	2019-06-08	Sprig	Pivnita de Vin	Mine	A2104	Miniopterus schreibersii	F
A2106_1_1	Nycteribia schmidlii	M	no	2019-06-08	Sprig	Pivnita de Vin	Mine	A2106	Miniopterus schreibersii	M
A2106_1_2	Nycteribia schmidlii	M	no	2019-06-08	Sprig	Pivnita de Vin	Mine	A2106	Miniopterus schreibersii	M
A2106_1_3	Nycteribia schmidlii	M	no	2019-06-08	Sprig	Pivnita de Vin	Mine	A2106	Miniopterus schreibersii	M
A2106_1_4	Nycteribia schmidlii	M	no	2019-06-08	Sprig	Pivnita de Vin	Mine	A2106	Miniopterus schreibersii	M
A2106_2_1	Nycteribia schmidlii	F	no	2019-06-08	Sprig	Pivnita de Vin	Mine	A2106	Miniopterus schreibersii	M
A2106_2_2	Nycteribia schmidlii	F	no	2019-06-08	Sprig	Pivnita de Vin	Mine	A2106	Miniopterus schreibersii	M
A2106_2_3	Nycteribia schmidlii	F	no	2019-06-08	Sprig	Pivnita de Vin	Mine	A2106	Miniopterus schreibersii	M
A2106_2_4	Nycteribia schmidlii	F	no	2019-06-08	Sprig	Pivnita de Vin	Mine	A2106	Miniopterus schreibersii	M
A2106_2_5	Nycteribia schmidlii	F	no	2019-06-08	Sprig	Pivnita de Vin	Mine	A2106	Miniopterus schreibersii	M
A2106_2_6	Nycteribia schmidlii	F	no	2019-06-08	Sprig	Pivnita de Vin	Mine	A2106	Miniopterus schreibersii	M
A2106_2_7	Nycteribia schmidlii	F	no	2019-06-08	Sprig	Pivnita de Vin	Mine	A2106	Miniopterus schreibersii	M
A2106_3_1	Penicillidia conspicua	F	no	2019-06-08	Sprig	Pivnita de Vin	Mine	A2106	Miniopterus schreibersii	M
A2162_1_1	Phthiridium biarticulatum	M	no	2019-06-12	Sprig	Hală Nurcărie	Building	A2162	Rhinolophus ferrumequinum	F
A2168_1_1	Penicillidia dufourii	M	yes	2019-06-13	Sprig	Motel Tifra	Building	A2168	Miniopterus schreibersii	M
A2168_2_1	Penicillidia dufourii	F	yes	2019-06-13	Sprig	Motel Tifra	Building	A2168	Miniopterus schreibersii	M
A2168_3_1	Nycteribia schmidlii	M	no	2019-06-13	Sprig	Motel Tifra	Building	A2168	Miniopterus schreibersii	M
A2168_4_1	Nycteribia schmidlii	F	no	2019-06-13	Sprig	Motel Tifra	Building	A2168	Miniopterus schreibersii	M
A2169_1_1	Penicillidia dufourii	F	yes	2019-06-13	Sprig	Motel Tifra	Building	A2169	Miniopterus schreibersii	F
A2170_1_1	Nycteribia schmidlii	F	no	2019-06-13	Sprig	Motel Tifra	Building	A2170	Miniopterus schreibersii	F
A2170_1_2	Nycteribia schmidlii	F	no	2019-06-13	Sprig	Motel Tifra	Building	A2170	Miniopterus schreibersii	F
A2170_2_1	Penicillidia dufourii	F	yes	2019-06-13	Sprig	Motel Tifra	Building	A2170	Miniopterus schreibersii	F
A2187_1_1	Phthiridium biarticulatum	F	no	2019-08-06	Fall	Hală Nurcărie	Building	A2187	Rhinolophus ferrumequinum	F
A2191_1_1	Phthiridium biarticulatum	F	no	2019-08-06	Fall	Hală Nurcărie	Building	A2191	Rhinolophus ferrumequinum	F
A2192_1_1	Phthiridium biarticulatum	M	no	2019-08-06	Fall	Hală Nurcărie	Building	A2192	Rhinolophus ferrumequinum	F
A2192_2_1	Phthiridium biarticulatum	F	no	2019-08-06	Fall	Hală Nurcărie	Building	A2192	Rhinolophus ferrumequinum	F
A2194_1_1	Phthiridium biarticulatum	M	no	2019-08-06	Fall	Hală Nurcărie	Building	A2194	Rhinolophus ferrumequinum	F
A2196_1_1	Phthiridium biarticulatum	M	no	2019-08-06	Fall	Hală Nurcărie	Building	A2196	Rhinolophus ferrumequinum	F
A2196_2_1	Phthiridium biarticulatum	F	no	2019-08-06	Fall	Hală Nurcărie	Building	A2196	Rhinolophus ferrumequinum	F
A2197_1_1	Phthiridium biarticulatum	M	no	2019-08-06	Fall	Hală Nurcărie	Building	A2197	Rhinolophus ferrumequinum	F
A2198_1_1	Phthiridium biarticulatum	M	no	2019-08-06	Fall	Hală Nurcărie	Building	A2198	Rhinolophus ferrumequinum	M
A2198_2_1	Phthiridium biarticulatum	F	no	2019-08-06	Fall	Hală Nurcărie	Building	A2198	Rhinolophus ferrumequinum	M
A2200_1_1	Phthiridium biarticulatum	M	yes	2019-08-06	Fall	Hală Nurcărie	Building	A2200	Rhinolophus ferrumequinum	F
A2202_1_1	Phthiridium biarticulatum	F	no	2019-08-06	Fall	Hală Nurcărie	Building	A2202	Rhinolophus ferrumequinum	F
A2206_1_1	Phthiridium biarticulatum	F	no	2019-08-06	Fall	Hală Nurcărie	Building	A2206	Rhinolophus ferrumequinum	F
A2211_1_1	Phthiridium biarticulatum	F	no	2019-08-06	Fall	Hală Nurcărie	Building	A2211	Rhinolophus ferrumequinum	F
A2211_1_2	Phthiridium biarticulatum	F	no	2019-08-06	Fall	Hală Nurcărie	Building	A2211	Rhinolophus ferrumequinum	F
A2213_1_1	Phthiridium biarticulatum	F	no	2019-08-06	Fall	Hală Nurcărie	Building	A2213	Rhinolophus ferrumequinum	M
A2214_1_1	Phthiridium biarticulatum	M	yes	2019-08-06	Fall	Hală Nurcărie	Building	A2214	Rhinolophus ferrumequinum	F
A2215_1_1	Phthiridium biarticulatum	F	yes	2019-08-06	Fall	Hală Nurcărie	Building	A2215	Rhinolophus ferrumequinum	M
A2215_2_1	Phthiridium biarticulatum	F	no	2019-08-06	Fall	Hală Nurcărie	Building	A2215	Rhinolophus ferrumequinum	M
A2222_1_1	Phthiridium biarticulatum	F	no	2019-08-06	Fall	Hală Nurcărie	Building	A2222	Rhinolophus ferrumequinum	F
A2224_1_1	Phthiridium biarticulatum	M	no	2019-08-06	Fall	Hală Nurcărie	Building	A2224	Rhinolophus ferrumequinum	F
A2224_1_2	Phthiridium biarticulatum	M	no	2019-08-06	Fall	Hală Nurcărie	Building	A2224	Rhinolophus ferrumequinum	F
A2225_1_1	Phthiridium biarticulatum	M	no	2019-08-06	Fall	Hală Nurcărie	Building	A2225	Rhinolophus ferrumequinum	F
A2226_1_1	Phthiridium biarticulatum	M	no	2019-08-06	Fall	Hală Nurcărie	Building	A2226	Rhinolophus ferrumequinum	F
A2227_1_1	Phthiridium biarticulatum	M	no	2019-08-06	Fall	Hală Nurcărie	Building	A2227	Rhinolophus ferrumequinum	M
A2227_1_2	Phthiridium biarticulatum	M	no	2019-08-06	Fall	Hală Nurcărie	Building	A2227	Rhinolophus ferrumequinum	M
A2227_2_1	Phthiridium biarticulatum	F	no	2019-08-06	Fall	Hală Nurcărie	Building	A2227	Rhinolophus ferrumequinum	M
A2227_2_2	Phthiridium biarticulatum	F	no	2019-08-06	Fall	Hală Nurcărie	Building	A2227	Rhinolophus ferrumequinum	M
A2231_1_1	Phthiridium biarticulatum	M	no	2019-08-06	Fall	Hală Nurcărie	Building	A2231	Rhinolophus ferrumequinum	F
A2232_1_1	Phthiridium biarticulatum	M	no	2019-08-06	Fall	Hală Nurcărie	Building	A2232	Rhinolophus ferrumequinum	F
A2233_1_1	Phthiridium biarticulatum	M	no	2019-08-06	Fall	Hală Nurcărie	Building	A2233	Rhinolophus ferrumequinum	F
A2233_2_1	Phthiridium biarticulatum	F	no	2019-08-06	Fall	Hală Nurcărie	Building	A2233	Rhinolophus ferrumequinum	F
A2251_1_1	Penicillidia dufourii	M	no	2019-08-06	Fall	Hală Nurcărie	Building	A2251	Myotis emarginatus	F
A2268_1_1	Nycteribia vexata	F	no	2019-08-23	Fall	Pestera de la Meresti	Cave	A2268	Myotis bechsteinii	M
A2268_1_2	Nycteribia vexata	F	no	2019-08-23	Fall	Pestera de la Meresti	Cave	A2268	Myotis bechsteinii	M
A2283_1_1	Nycteribia vexata	M	no	2019-08-23	Fall	Pestera de la Meresti	Cave	A2283	Myotis myotis	M
A2290_1_1	Penicillidia dufourii	F	no	2019-08-24	Fall	Pestera de la Meresti	Cave	A2290	Myotis myotis	F
A2294_1_1	Penicillidia dufourii	M	no	2019-08-24	Fall	Pestera de la Meresti	Cave	A2294	Myotis myotis	F
A2294_1_2	Penicillidia dufourii	M	no	2019-08-24	Fall	Pestera de la Meresti	Cave	A2294	Myotis myotis	F
A2295_1_1	Penicillidia dufourii	F	no	2019-08-24	Fall	Pestera de la Meresti	Cave	A2295	Myotis myotis	F
A2300_1_1	Penicillidia dufourii	M	no	2019-08-24	Fall	Pestera de la Meresti	Cave	A2300	Myotis myotis	F
A2300_2_1	Penicillidia dufourii	F	no	2019-08-24	Fall	Pestera de la Meresti	Cave	A2300	Myotis myotis	F
A2303_1_1	Penicillidia dufourii	F	yes	2019-08-24	Fall	Pestera de la Meresti	Cave	A2303	Myotis myotis	F
A2310_1_1	Nycteribia latreilli	F	no	2019-08-24	Fall	Pestera de la Meresti	Cave	A2310	Myotis myotis	F
A2312_1_1	Penicillidia dufourii	M	no	2019-08-24	Fall	Pestera de la Meresti	Cave	A2312	Myotis blythii	F
A2315_1_1	Nycteribia latreilli	F	no	2019-08-24	Fall	Pestera de la Meresti	Cave	A2315	Myotis myotis	F
A2319_1_1	Penicillidia dufourii	M	no	2019-08-24	Fall	Pestera de la Meresti	Cave	A2319	Myotis blythii	F
A2319_1_2	Penicillidia dufourii	M	no	2019-08-24	Fall	Pestera de la Meresti	Cave	A2319	Myotis blythii	F
A2319_2_1	Penicillidia dufourii	F	no	2019-08-24	Fall	Pestera de la Meresti	Cave	A2319	Myotis blythii	F
A2322_1_1	Penicillidia dufourii	M	no	2019-08-24	Fall	Pestera de la Meresti	Cave	A2322	Myotis myotis	F
A2324_1_1	Nycteribia latreilli	M	no	2019-08-24	Fall	Pestera de la Meresti	Cave	A2324	Nyctalus noctula	F
A2324_1_2	Nycteribia latreilli	M	no	2019-08-24	Fall	Pestera de la Meresti	Cave	A2324	Nyctalus noctula	F
A2324_2_1	Nycteribia latreilli	F	no	2019-08-24	Fall	Pestera de la Meresti	Cave	A2324	Nyctalus noctula	F
A2324_2_2	Nycteribia latreilli	F	no	2019-08-24	Fall	Pestera de la Meresti	Cave	A2324	Nyctalus noctula	F
A2330_1_1	Penicillidia dufourii	F	no	2019-08-24	Fall	Pestera de la Meresti	Cave	A2330	Myotis blythii	M
A2331_1_1	Penicillidia dufourii	M	no	2019-08-24	Fall	Pestera de la Meresti	Cave	A2331	Myotis myotis	F
A2331_2_1	Penicillidia dufourii	F	no	2019-08-24	Fall	Pestera de la Meresti	Cave	A2331	Myotis myotis	F
A2332_1_1	Penicillidia dufourii	F	no	2019-08-24	Fall	Pestera de la Meresti	Cave	A2332	Myotis myotis	F
A2334_1_1	Nycteribia latreilli	M	no	2019-08-24	Fall	Pestera de la Meresti	Cave	A2334	Myotis myotis	F
A2338_1_1	Penicillidia dufourii	M	yes	2019-08-24	Fall	Pestera de la Meresti	Cave	A2338	Myotis myotis	F
A2338_2_1	Penicillidia dufourii	F	yes	2019-08-24	Fall	Pestera de la Meresti	Cave	A2338	Myotis myotis	F
A2338_2_2	Penicillidia dufourii	F	yes	2019-08-24	Fall	Pestera de la Meresti	Cave	A2338	Myotis myotis	F
A2338_2_3	Penicillidia dufourii	F	no	2019-08-24	Fall	Pestera de la Meresti	Cave	A2338	Myotis myotis	F
A2339_1_1	Penicillidia dufourii	F	no	2019-08-24	Fall	Pestera de la Meresti	Cave	A2339	Myotis blythii	F
A2341_1_1	Penicillidia dufourii	M	yes	2019-08-24	Fall	Pestera de la Meresti	Cave	A2341	Myotis myotis	F
A2353_1_1	Penicillidia dufourii	F	no	2019-08-24	Fall	Pestera de la Meresti	Cave	A2353	Myotis myotis	F
A2356_1_1	Penicillidia dufourii	M	no	2019-08-24	Fall	Pestera de la Meresti	Cave	A2356	Myotis myotis	M
A2356_1_2	Penicillidia dufourii	M	no	2019-08-24	Fall	Pestera de la Meresti	Cave	A2356	Myotis myotis	M
A2356_2_1	Penicillidia dufourii	F	no	2019-08-24	Fall	Pestera de la Meresti	Cave	A2356	Myotis myotis	M
A2356_3_1	Basilia nana	M	no	2019-08-24	Fall	Pestera de la Meresti	Cave	A2356	Myotis myotis	M
A2361_1_1	Basilia nana	F	no	2019-08-24	Fall	Pestera de la Meresti	Cave	A2361	Myotis alcathoe	M
A2368_1_1	Phthiridium biarticulatum	F	no	2019-08-24	Fall	Pestera de la Meresti	Cave	A2368	Rhinolophus hipposideros	F
A2369_1_1	Basilia nana	M	no	2019-08-24	Fall	Pestera de la Meresti	Cave	A2369	Myotis bechsteinii	M
A2372_1_1	Penicillidia conspicua	F	yes	2019-09-07	Fall	Avenul Betfia	Cave	A2372	Miniopterus schreibersii	M
A2372_2_1	Nycteribia schmidlii	F	no	2019-09-07	Fall	Avenul Betfia	Cave	A2372	Miniopterus schreibersii	M
A2374_1_1	Penicillidia conspicua	M	yes	2019-09-07	Fall	Avenul Betfia	Cave	A2374	Miniopterus schreibersii	M
A2374_2_1	Penicillidia conspicua	F	yes	2019-09-07	Fall	Avenul Betfia	Cave	A2374	Miniopterus schreibersii	M
A2375_1_1	Penicillidia conspicua	M	yes	2019-09-07	Fall	Avenul Betfia	Cave	A2375	Miniopterus schreibersii	M
A2375_1_2	Penicillidia conspicua	M	no	2019-09-07	Fall	Avenul Betfia	Cave	A2375	Miniopterus schreibersii	M
A2375_2_1	Penicillidia conspicua	F	yes	2019-09-07	Fall	Avenul Betfia	Cave	A2375	Miniopterus schreibersii	M
A2376_1_1	Nycteribia schmidlii	F	yes	2019-09-07	Fall	Avenul Betfia	Cave	A2376	Miniopterus schreibersii	M
A2379_1_1	Nycteribia schmidlii	M	no	2019-09-07	Fall	Avenul Betfia	Cave	A2379	Miniopterus schreibersii	F
A2381_1_1	Nycteribia schmidlii	F	no	2019-09-07	Fall	Avenul Betfia	Cave	A2381	Miniopterus schreibersii	M
A2382_1_1	Nycteribia schmidlii	M	no	2019-09-07	Fall	Avenul Betfia	Cave	A2382	Miniopterus schreibersii	M
A2382_1_2	Nycteribia schmidlii	M	no	2019-09-07	Fall	Avenul Betfia	Cave	A2382	Miniopterus schreibersii	M
A2382_2_1	Nycteribia schmidlii	F	no	2019-09-07	Fall	Avenul Betfia	Cave	A2382	Miniopterus schreibersii	M
A2385_1_1	Penicillidia conspicua	F	yes	2019-09-07	Fall	Avenul Betfia	Cave	A2385	Miniopterus schreibersii	M
A2385_1_2	Penicillidia conspicua	F	yes	2019-09-07	Fall	Avenul Betfia	Cave	A2385	Miniopterus schreibersii	M
A2388_1_1	Nycteribia schmidlii	M	no	2019-09-07	Fall	Avenul Betfia	Cave	A2388	Miniopterus schreibersii	F
A2388_1_2	Nycteribia schmidlii	M	no	2019-09-07	Fall	Avenul Betfia	Cave	A2388	Miniopterus schreibersii	F
A2388_1_3	Nycteribia schmidlii	M	no	2019-09-07	Fall	Avenul Betfia	Cave	A2388	Miniopterus schreibersii	F
A2388_1_4	Nycteribia schmidlii	M	no	2019-09-07	Fall	Avenul Betfia	Cave	A2388	Miniopterus schreibersii	F
A2388_2_1	Nycteribia schmidlii	F	no	2019-09-07	Fall	Avenul Betfia	Cave	A2388	Miniopterus schreibersii	F
A2389_1_1	Penicillidia dufourii	M	no	2019-09-07	Fall	Avenul Betfia	Cave	A2389	Miniopterus schreibersii	M
A2389_2_1	Penicillidia conspicua	F	yes	2019-09-07	Fall	Avenul Betfia	Cave	A2389	Miniopterus schreibersii	M
A2389_2_2	Penicillidia conspicua	F	yes	2019-09-07	Fall	Avenul Betfia	Cave	A2389	Miniopterus schreibersii	M
A2389_3_1	Nycteribia schmidlii	F	no	2019-09-07	Fall	Avenul Betfia	Cave	A2389	Miniopterus schreibersii	M
A2393_1_1	Nycteribia schmidlii	F	no	2019-09-07	Fall	Avenul Betfia	Cave	A2393	Miniopterus schreibersii	F
A2393_1_2	Nycteribia schmidlii	F	no	2019-09-07	Fall	Avenul Betfia	Cave	A2393	Miniopterus schreibersii	F
A2394_1_1	Penicillidia conspicua	F	yes	2019-09-07	Fall	Avenul Betfia	Cave	A2394	Miniopterus schreibersii	M
A2395_1_1	Nycteribia schmidlii	F	no	2019-09-07	Fall	Avenul Betfia	Cave	A2395	Miniopterus schreibersii	M
A2396_1_1	Penicillidia conspicua	F	no	2019-09-07	Fall	Avenul Betfia	Cave	A2396	Miniopterus schreibersii	F
A2398_1_1	Penicillidia conspicua	M	yes	2019-09-07	Fall	Avenul Betfia	Cave	A2398	Miniopterus schreibersii	M
A2398_1_2	Penicillidia conspicua	M	no	2019-09-07	Fall	Avenul Betfia	Cave	A2398	Miniopterus schreibersii	M
A2406_1_1	Nycteribia schmidlii	F	yes	2019-09-07	Fall	Avenul Betfia	Cave	A2406	Miniopterus schreibersii	F
A2407_1_1	Nycteribia schmidlii	F	no	2019-09-07	Fall	Avenul Betfia	Cave	A2407	Miniopterus schreibersii	F
A2407_1_2	Nycteribia schmidlii	F	no	2019-09-07	Fall	Avenul Betfia	Cave	A2407	Miniopterus schreibersii	F
A2407_1_3	Nycteribia schmidlii	F	no	2019-09-07	Fall	Avenul Betfia	Cave	A2407	Miniopterus schreibersii	F
A2407_1_4	Nycteribia schmidlii	F	no	2019-09-07	Fall	Avenul Betfia	Cave	A2407	Miniopterus schreibersii	F
A2408_1_1	Nycteribia schmidlii	F	no	2019-09-07	Fall	Avenul Betfia	Cave	A2408	Miniopterus schreibersii	M
A2411_1_1	Penicillidia conspicua	M	yes	2019-09-07	Fall	Avenul Betfia	Cave	A2411	Miniopterus schreibersii	M
A2412_1_1	Nycteribia schmidlii	F	no	2019-09-07	Fall	Avenul Betfia	Cave	A2412	Miniopterus schreibersii	F
A2412_1_2	Nycteribia schmidlii	F	no	2019-09-07	Fall	Avenul Betfia	Cave	A2412	Miniopterus schreibersii	F
A2416_1_1	Nycteribia schmidlii	F	no	2019-09-07	Fall	Avenul Betfia	Cave	A2416	Miniopterus schreibersii	M
A2418_1_1	Nycteribia schmidlii	M	no	2019-09-07	Fall	Avenul Betfia	Cave	A2418	Miniopterus schreibersii	M
A2419_1_1	Nycteribia schmidlii	F	no	2019-09-07	Fall	Avenul Betfia	Cave	A2419	Miniopterus schreibersii	F
A2420_1_1	Nycteribia schmidlii	F	no	2019-09-07	Fall	Avenul Betfia	Cave	A2420	Miniopterus schreibersii	F
A2420_1_2	Nycteribia schmidlii	F	no	2019-09-07	Fall	Avenul Betfia	Cave	A2420	Miniopterus schreibersii	F
A2421_1_1	Penicillidia conspicua	M	yes	2019-09-07	Fall	Avenul Betfia	Cave	A2421	Miniopterus schreibersii	M
A2421_2_1	Penicillidia conspicua	F	yes	2019-09-07	Fall	Avenul Betfia	Cave	A2421	Miniopterus schreibersii	M
A2423_1_1	Penicillidia dufourii	F	no	2019-09-07	Fall	Avenul Betfia	Cave	A2423	Myotis myotis	F
A2423_1_2	Penicillidia dufourii	F	no	2019-09-07	Fall	Avenul Betfia	Cave	A2423	Myotis myotis	F
A2424_1_1	Penicillidia dufourii	M	yes	2019-09-07	Fall	Avenul Betfia	Cave	A2424	Myotis blythii	F
A2424_2_1	Penicillidia dufourii	F	no	2019-09-07	Fall	Avenul Betfia	Cave	A2424	Myotis blythii	F
A2425_1_1	Penicillidia dufourii	M	no	2019-09-07	Fall	Avenul Betfia	Cave	A2425	Myotis myotis	F
A2425_2_1	Penicillidia dufourii	F	no	2019-09-07	Fall	Avenul Betfia	Cave	A2425	Myotis myotis	F
A2425_2_2	Penicillidia dufourii	F	no	2019-09-07	Fall	Avenul Betfia	Cave	A2425	Myotis myotis	F
A2429_1_1	Nycteribia schmidlii	F	no	2019-09-08	Fall	Pivnita de Vin	Mine	A2429	Miniopterus schreibersii	F
A2430_1_1	Nycteribia schmidlii	F	no	2019-09-08	Fall	Pivnita de Vin	Mine	A2430	Miniopterus schreibersii	M
A2430_1_2	Nycteribia schmidlii	F	no	2019-09-08	Fall	Pivnita de Vin	Mine	A2430	Miniopterus schreibersii	M
A2430_1_3	Nycteribia schmidlii	F	no	2019-09-08	Fall	Pivnita de Vin	Mine	A2430	Miniopterus schreibersii	M
A2431_1_1	Nycteribia schmidlii	F	no	2019-09-08	Fall	Pivnita de Vin	Mine	A2431	Miniopterus schreibersii	F
A2431_1_2	Nycteribia schmidlii	F	no	2019-09-08	Fall	Pivnita de Vin	Mine	A2431	Miniopterus schreibersii	F
A2431_2_1	Nycteribia schmidlii	M	no	2019-09-08	Fall	Pivnita de Vin	Mine	A2431	Miniopterus schreibersii	F
A2431_3_1	Nycteribia schmidlii	F	no	2019-09-08	Fall	Pivnita de Vin	Mine	A2431	Miniopterus schreibersii	F
A2431_4_1	Penicillidia conspicua	M	yes	2019-09-08	Fall	Pivnita de Vin	Mine	A2431	Miniopterus schreibersii	F
A2434_1_1	Nycteribia schmidlii	F	no	2019-09-08	Fall	Pivnita de Vin	Mine	A2434	Miniopterus schreibersii	M
A2435_1_1	Penicillidia conspicua	M	yes	2019-09-08	Fall	Pivnita de Vin	Mine	A2435	Miniopterus schreibersii	M
A2436_1_1	Penicillidia conspicua	M	no	2019-09-08	Fall	Pivnita de Vin	Mine	A2436	Miniopterus schreibersii	M
A2436_2_1	Penicillidia conspicua	F	no	2019-09-08	Fall	Pivnita de Vin	Mine	A2436	Miniopterus schreibersii	M
A2436_3_1	Nycteribia schmidlii	F	no	2019-09-08	Fall	Pivnita de Vin	Mine	A2436	Miniopterus schreibersii	M
A2437_1_1	Nycteribia schmidlii	F	no	2019-09-08	Fall	Pivnita de Vin	Mine	A2437	Miniopterus schreibersii	F
A2437_2_1	Penicillidia conspicua	F	no	2019-09-08	Fall	Pivnita de Vin	Mine	A2437	Miniopterus schreibersii	F
A2439_1_1	Penicillidia conspicua	M	yes	2019-09-08	Fall	Pivnita de Vin	Mine	A2439	Miniopterus schreibersii	F
A2439_2_1	Nycteribia schmidlii	F	no	2019-09-08	Fall	Pivnita de Vin	Mine	A2439	Miniopterus schreibersii	F
A2440_1_1	Penicillidia conspicua	M	yes	2019-09-08	Fall	Pivnita de Vin	Mine	A2440	Miniopterus schreibersii	M
A2440_1_2	Penicillidia conspicua	M	no	2019-09-08	Fall	Pivnita de Vin	Mine	A2440	Miniopterus schreibersii	M
A2440_2_1	Penicillidia conspicua	F	no	2019-09-08	Fall	Pivnita de Vin	Mine	A2440	Miniopterus schreibersii	M
A2440_2_2	Penicillidia conspicua	F	no	2019-09-08	Fall	Pivnita de Vin	Mine	A2440	Miniopterus schreibersii	M
A2440_3_1	Nycteribia schmidlii	M	no	2019-09-08	Fall	Pivnita de Vin	Mine	A2440	Miniopterus schreibersii	M
A2440_4_1	Nycteribia schmidlii	F	no	2019-09-08	Fall	Pivnita de Vin	Mine	A2440	Miniopterus schreibersii	M
A2441_1_1	Nycteribia schmidlii	M	no	2019-09-08	Fall	Pivnita de Vin	Mine	A2441	Miniopterus schreibersii	M
A2442_1_1	Nycteribia schmidlii	F	no	2019-09-08	Fall	Pivnita de Vin	Mine	A2442	Miniopterus schreibersii	F
A2443_1_1	Nycteribia schmidlii	M	no	2019-09-08	Fall	Pivnita de Vin	Mine	A2443	Miniopterus schreibersii	F
A2444_1_1	Nycteribia schmidlii	F	no	2019-09-08	Fall	Pivnita de Vin	Mine	A2444	Miniopterus schreibersii	M
A2444_2_1	Nycteribia schmidlii	M	no	2019-09-08	Fall	Pivnita de Vin	Mine	A2444	Miniopterus schreibersii	M
A2444_3_1	Penicillidia conspicua	F	yes	2019-09-08	Fall	Pivnita de Vin	Mine	A2444	Miniopterus schreibersii	M
A2445_1_1	Penicillidia conspicua	M	yes	2019-09-08	Fall	Pivnita de Vin	Mine	A2445	Miniopterus schreibersii	M
A2446_1_1	Penicillidia conspicua	F	yes	2019-09-08	Fall	Pivnita de Vin	Mine	A2446	Miniopterus schreibersii	M
A2447_1_1	Penicillidia conspicua	F	yes	2019-09-08	Fall	Pivnita de Vin	Mine	A2447	Miniopterus schreibersii	M
A2449_1_1	Penicillidia conspicua	F	yes	2019-09-08	Fall	Pivnita de Vin	Mine	A2449	Miniopterus schreibersii	M
A2449_1_2	Penicillidia conspicua	F	no	2019-09-08	Fall	Pivnita de Vin	Mine	A2449	Miniopterus schreibersii	M
A2450_1_1	Nycteribia schmidlii	M	no	2019-09-08	Fall	Pivnita de Vin	Mine	A2450	Miniopterus schreibersii	F
A2452_1_1	Nycteribia schmidlii	M	no	2019-09-08	Fall	Pivnita de Vin	Mine	A2452	Miniopterus schreibersii	M
A2452_2_1	Nycteribia schmidlii	F	no	2019-09-08	Fall	Pivnita de Vin	Mine	A2452	Miniopterus schreibersii	M
A2453_1_1	Penicillidia conspicua	F	yes	2019-09-08	Fall	Pivnita de Vin	Mine	A2453	Miniopterus schreibersii	M
A2453_2_1	Nycteribia schmidlii	F	no	2019-09-08	Fall	Pivnita de Vin	Mine	A2453	Miniopterus schreibersii	M
A2454_1_1	Penicillidia conspicua	F	no	2019-09-08	Fall	Pivnita de Vin	Mine	A2454	Miniopterus schreibersii	M
A2454_2_1	Nycteribia schmidlii	F	no	2019-09-08	Fall	Pivnita de Vin	Mine	A2454	Miniopterus schreibersii	M
A2455_1_1	Nycteribia schmidlii	M	no	2019-09-08	Fall	Pivnita de Vin	Mine	A2455	Miniopterus schreibersii	F
A2455_1_2	Nycteribia schmidlii	M	no	2019-09-08	Fall	Pivnita de Vin	Mine	A2455	Miniopterus schreibersii	F
A2455_1_3	Nycteribia schmidlii	M	no	2019-09-08	Fall	Pivnita de Vin	Mine	A2455	Miniopterus schreibersii	F
A2455_2_1	Nycteribia schmidlii	F	no	2019-09-08	Fall	Pivnita de Vin	Mine	A2455	Miniopterus schreibersii	F
A2455_2_2	Nycteribia schmidlii	F	no	2019-09-08	Fall	Pivnita de Vin	Mine	A2455	Miniopterus schreibersii	F
A2455_2_3	Nycteribia schmidlii	F	no	2019-09-08	Fall	Pivnita de Vin	Mine	A2455	Miniopterus schreibersii	F
A2456_1_1	Nycteribia schmidlii	F	no	2019-09-08	Fall	Pivnita de Vin	Mine	A2456	Miniopterus schreibersii	F
A2456_1_2	Nycteribia schmidlii	F	no	2019-09-08	Fall	Pivnita de Vin	Mine	A2456	Miniopterus schreibersii	F
A2459_1_1	Nycteribia schmidlii	M	no	2019-09-08	Fall	Pivnita de Vin	Mine	A2459	Miniopterus schreibersii	F
A2459_1_2	Nycteribia schmidlii	M	no	2019-09-08	Fall	Pivnita de Vin	Mine	A2459	Miniopterus schreibersii	F
A2459_2_1	Nycteribia schmidlii	F	no	2019-09-08	Fall	Pivnita de Vin	Mine	A2459	Miniopterus schreibersii	F
A2459_2_2	Nycteribia schmidlii	F	no	2019-09-08	Fall	Pivnita de Vin	Mine	A2459	Miniopterus schreibersii	F
A2460_1_1	Nycteribia schmidlii	F	no	2019-09-08	Fall	Pivnita de Vin	Mine	A2460	Miniopterus schreibersii	M
A2460_1_2	Nycteribia schmidlii	F	no	2019-09-08	Fall	Pivnita de Vin	Mine	A2460	Miniopterus schreibersii	M
A2460_1_3	Nycteribia schmidlii	F	no	2019-09-08	Fall	Pivnita de Vin	Mine	A2460	Miniopterus schreibersii	M
A2460_2_1	Penicillidia conspicua	F	no	2019-09-08	Fall	Pivnita de Vin	Mine	A2460	Miniopterus schreibersii	M
A2461_1_1	Penicillidia conspicua	F	no	2019-09-08	Fall	Pivnita de Vin	Mine	A2461	Miniopterus schreibersii	M
A2461_1_2	Penicillidia conspicua	F	no	2019-09-08	Fall	Pivnita de Vin	Mine	A2461	Miniopterus schreibersii	M
A2462_1_1	Nycteribia schmidlii	M	no	2019-09-08	Fall	Pivnita de Vin	Mine	A2462	Miniopterus schreibersii	F
A2462_2_1	Penicillidia conspicua	F	yes	2019-09-08	Fall	Pivnita de Vin	Mine	A2462	Miniopterus schreibersii	F
A2466_1_1	Nycteribia schmidlii	M	no	2019-09-08	Fall	Pivnita de Vin	Mine	A2466	Miniopterus schreibersii	M
A2466_2_1	Nycteribia schmidlii	F	no	2019-09-08	Fall	Pivnita de Vin	Mine	A2466	Miniopterus schreibersii	M
A2468_1_1	Nycteribia schmidlii	M	no	2019-09-08	Fall	Pivnita de Vin	Mine	A2468	Miniopterus schreibersii	M
A2468_2_1	Nycteribia schmidlii	F	no	2019-09-08	Fall	Pivnita de Vin	Mine	A2468	Miniopterus schreibersii	M
A2470_1_1	Penicillidia conspicua	M	no	2019-09-08	Fall	Pivnita de Vin	Mine	A2470	Miniopterus schreibersii	M
A2470_2_1	Penicillidia conspicua	F	yes	2019-09-08	Fall	Pivnita de Vin	Mine	A2470	Miniopterus schreibersii	M
A2470_3_1	Nycteribia schmidlii	F	no	2019-09-08	Fall	Pivnita de Vin	Mine	A2470	Miniopterus schreibersii	M
A2472_1_1	Nycteribia schmidlii	F	no	2019-09-08	Fall	Pivnita de Vin	Mine	A2472	Miniopterus schreibersii	F
A2472_1_2	Nycteribia schmidlii	F	no	2019-09-08	Fall	Pivnita de Vin	Mine	A2472	Miniopterus schreibersii	F
A2472_1_3	Nycteribia schmidlii	F	no	2019-09-08	Fall	Pivnita de Vin	Mine	A2472	Miniopterus schreibersii	F
A2472_1_4	Nycteribia schmidlii	F	no	2019-09-08	Fall	Pivnita de Vin	Mine	A2472	Miniopterus schreibersii	F
A2473_1_1	Nycteribia schmidlii	M	no	2019-09-08	Fall	Pivnita de Vin	Mine	A2473	Miniopterus schreibersii	M
A2473_2_1	Nycteribia schmidlii	F	no	2019-09-08	Fall	Pivnita de Vin	Mine	A2473	Miniopterus schreibersii	M
A2473_2_2	Nycteribia schmidlii	F	no	2019-09-08	Fall	Pivnita de Vin	Mine	A2473	Miniopterus schreibersii	M
A2474_1_1	Phthiridium biarticulatum	M	no	2019-09-18	Fall	Dealul Bechir	Mine	A2474	Rhinolophus ferrumequinum	M
A2474_2_1	Phthiridium biarticulatum	F	no	2019-09-18	Fall	Dealul Bechir	Mine	A2474	Rhinolophus ferrumequinum	M
A2476_1_1	Nycteribia schmidlii	M	yes	2019-09-18	Fall	Dealul Bechir	Mine	A2476	Miniopterus schreibersii	F
A2479_1_1	Phthiridium biarticulatum	M	no	2019-09-18	Fall	Dealul Bechir	Mine	A2479	Rhinolophus ferrumequinum	F
A2479_1_2	Phthiridium biarticulatum	M	no	2019-09-18	Fall	Dealul Bechir	Mine	A2479	Rhinolophus ferrumequinum	F
A2479_1_3	Phthiridium biarticulatum	M	no	2019-09-18	Fall	Dealul Bechir	Mine	A2479	Rhinolophus ferrumequinum	F
A2479_2_1	Phthiridium biarticulatum	F	no	2019-09-18	Fall	Dealul Bechir	Mine	A2479	Rhinolophus ferrumequinum	F
A2480_1_1	Nycteribia schmidlii	M	no	2019-09-18	Fall	Dealul Bechir	Mine	A2480	Miniopterus schreibersii	M
A2480_2_1	Nycteribia schmidlii	F	no	2019-09-18	Fall	Dealul Bechir	Mine	A2480	Miniopterus schreibersii	M
A2484_1_1	Nycteribia schmidlii	F	no	2019-09-18	Fall	Dealul Bechir	Mine	A2484	Miniopterus schreibersii	M
A2486_1_1	Nycteribia schmidlii	M	no	2019-09-18	Fall	Dealul Bechir	Mine	A2486	Miniopterus schreibersii	F
A2500_1_1	Penicillidia conspicua	F	no	2019-09-18	Fall	Dealul Bechir	Mine	A2500	Myotis daubentonii	M
A2500_2_1	Nycteribia kolenatii	F	no	2019-09-18	Fall	Dealul Bechir	Mine	A2500	Myotis daubentonii	M
A2501_1_1	Nycteribia kolenatii	F	no	2019-09-18	Fall	Dealul Bechir	Mine	A2501	Myotis daubentonii	M
A2501_1_2	Nycteribia kolenatii	F	no	2019-09-18	Fall	Dealul Bechir	Mine	A2501	Myotis daubentonii	M
A2501_1_3	Nycteribia kolenatii	F	no	2019-09-18	Fall	Dealul Bechir	Mine	A2501	Myotis daubentonii	M
A2501_1_4	Nycteribia kolenatii	F	no	2019-09-18	Fall	Dealul Bechir	Mine	A2501	Myotis daubentonii	M
A2501_1_5	Nycteribia kolenatii	F	no	2019-09-18	Fall	Dealul Bechir	Mine	A2501	Myotis daubentonii	M
A2501_1_6	Nycteribia kolenatii	F	no	2019-09-18	Fall	Dealul Bechir	Mine	A2501	Myotis daubentonii	M
A2501_2_1	Nycteribia kolenatii	M	no	2019-09-18	Fall	Dealul Bechir	Mine	A2501	Myotis daubentonii	M
A2501_2_2	Nycteribia kolenatii	M	no	2019-09-18	Fall	Dealul Bechir	Mine	A2501	Myotis daubentonii	M
A2501_2_3	Nycteribia kolenatii	M	no	2019-09-18	Fall	Dealul Bechir	Mine	A2501	Myotis daubentonii	M
A2501_2_4	Nycteribia kolenatii	M	no	2019-09-18	Fall	Dealul Bechir	Mine	A2501	Myotis daubentonii	M
A2502_1_1	Nycteribia kolenatii	M	no	2019-09-18	Fall	Dealul Bechir	Mine	A2502	Myotis daubentonii	M
A2502_1_2	Nycteribia kolenatii	M	no	2019-09-18	Fall	Dealul Bechir	Mine	A2502	Myotis daubentonii	M
A2502_1_3	Nycteribia kolenatii	M	no	2019-09-18	Fall	Dealul Bechir	Mine	A2502	Myotis daubentonii	M
A2503_1_1	Penicillidia conspicua	M	no	2019-09-18	Fall	Dealul Bechir	Mine	A2503	Miniopterus schreibersii	M
A2503_2_1	Nycteribia schmidlii	F	no	2019-09-18	Fall	Dealul Bechir	Mine	A2503	Miniopterus schreibersii	M
A2506_1_1	Phthiridium biarticulatum	M	no	2019-09-18	Fall	Dealul Bechir	Mine	A2506	Rhinolophus ferrumequinum	F
A2506_1_2	Phthiridium biarticulatum	M	no	2019-09-18	Fall	Dealul Bechir	Mine	A2506	Rhinolophus ferrumequinum	F
A2506_2_1	Phthiridium biarticulatum	F	no	2019-09-18	Fall	Dealul Bechir	Mine	A2506	Rhinolophus ferrumequinum	F
A2508_1_1	Nycteribia kolenatii	M	no	2019-09-18	Fall	Dealul Bechir	Mine	A2508	Myotis daubentonii	M
A2508_2_1	Nycteribia kolenatii	F	no	2019-09-18	Fall	Dealul Bechir	Mine	A2508	Myotis daubentonii	M
A2510_1_1	Nycteribia kolenatii	M	no	2019-09-18	Fall	Dealul Bechir	Mine	A2510	Myotis daubentonii	M
A2510_1_2	Nycteribia kolenatii	M	no	2019-09-18	Fall	Dealul Bechir	Mine	A2510	Myotis daubentonii	M
A2511_1_1	Nycteribia kolenatii	M	no	2019-09-18	Fall	Dealul Bechir	Mine	A2511	Myotis daubentonii	M
A2512_1_1	Nycteribia kolenatii	M	no	2019-09-18	Fall	Dealul Bechir	Mine	A2512	Myotis daubentonii	M
A2512_1_2	Nycteribia kolenatii	M	no	2019-09-18	Fall	Dealul Bechir	Mine	A2512	Myotis daubentonii	M
A2516_1_1	Nycteribia kolenatii	M	no	2019-09-18	Fall	Dealul Bechir	Mine	A2516	Myotis daubentonii	M
A2516_2_1	Nycteribia kolenatii	F	no	2019-09-18	Fall	Dealul Bechir	Mine	A2516	Myotis daubentonii	M
A2517_1_1	Nycteribia schmidlii	M	no	2019-09-18	Fall	Dealul Bechir	Mine	A2517	Myotis daubentonii	M
A2518_1_1	Nycteribia kolenatii	M	no	2019-09-18	Fall	Dealul Bechir	Mine	A2518	Myotis daubentonii	M
A2518_1_2	Nycteribia kolenatii	M	no	2019-09-18	Fall	Dealul Bechir	Mine	A2518	Myotis daubentonii	M
A2518_1_3	Nycteribia kolenatii	M	no	2019-09-18	Fall	Dealul Bechir	Mine	A2518	Myotis daubentonii	M
A2518_1_4	Nycteribia kolenatii	M	no	2019-09-18	Fall	Dealul Bechir	Mine	A2518	Myotis daubentonii	M
A2518_1_5	Nycteribia kolenatii	M	no	2019-09-18	Fall	Dealul Bechir	Mine	A2518	Myotis daubentonii	M
A2518_1_6	Nycteribia kolenatii	M	no	2019-09-18	Fall	Dealul Bechir	Mine	A2518	Myotis daubentonii	M
A2518_1_7	Nycteribia kolenatii	M	no	2019-09-18	Fall	Dealul Bechir	Mine	A2518	Myotis daubentonii	M
A2518_2_1	Nycteribia kolenatii	F	no	2019-09-18	Fall	Dealul Bechir	Mine	A2518	Myotis daubentonii	M
A2518_2_2	Nycteribia kolenatii	F	no	2019-09-18	Fall	Dealul Bechir	Mine	A2518	Myotis daubentonii	M
A2518_2_3	Nycteribia kolenatii	F	no	2019-09-18	Fall	Dealul Bechir	Mine	A2518	Myotis daubentonii	M
A2518_2_4	Nycteribia kolenatii	F	no	2019-09-18	Fall	Dealul Bechir	Mine	A2518	Myotis daubentonii	M
A2519_1_1	Nycteribia latreilli	M	no	2019-09-18	Fall	Dealul Bechir	Mine	A2519	Myotis daubentonii	M
A2519_1_2	Nycteribia latreilli	M	no	2019-09-18	Fall	Dealul Bechir	Mine	A2519	Myotis daubentonii	M
A2519_2_1	Nycteribia kolenatii	F	no	2019-09-18	Fall	Dealul Bechir	Mine	A2519	Myotis daubentonii	M
A2521_1_1	Nycteribia kolenatii	F	no	2019-09-18	Fall	Dealul Bechir	Mine	A2521	Myotis daubentonii	M
A2523_1_1	Nycteribia kolenatii	M	no	2019-09-18	Fall	Dealul Bechir	Mine	A2523	Myotis daubentonii	M
A2523_1_2	Nycteribia kolenatii	M	no	2019-09-18	Fall	Dealul Bechir	Mine	A2523	Myotis daubentonii	M
A2523_2_1	Nycteribia kolenatii	F	no	2019-09-18	Fall	Dealul Bechir	Mine	A2523	Myotis daubentonii	M
A2523_2_2	Nycteribia kolenatii	F	no	2019-09-18	Fall	Dealul Bechir	Mine	A2523	Myotis daubentonii	M
A2523_2_3	Nycteribia kolenatii	F	no	2019-09-18	Fall	Dealul Bechir	Mine	A2523	Myotis daubentonii	M
A2523_2_4	Nycteribia kolenatii	F	no	2019-09-18	Fall	Dealul Bechir	Mine	A2523	Myotis daubentonii	M
A2525_1_1	Nycteribia kolenatii	M	no	2019-09-18	Fall	Dealul Bechir	Mine	A2525	Myotis daubentonii	M
A2525_2_1	Nycteribia kolenatii	F	no	2019-09-18	Fall	Dealul Bechir	Mine	A2525	Myotis daubentonii	M
A2530_1_1	Basilia nana	M	no	2019-09-18	Fall	Dealul Bechir	Mine	A2530	Myotis bechsteinii	M
A2536_1_1	Phthiridium biarticulatum	F	yes	2019-09-18	Fall	Dealul Bechir	Mine	A2536	Rhinolophus ferrumequinum	F
A2537_1_1	Nycteribia kolenatii	F	no	2019-09-18	Fall	Dealul Bechir	Mine	A2537	Myotis daubentonii	M
A2537_1_2	Nycteribia kolenatii	F	no	2019-09-18	Fall	Dealul Bechir	Mine	A2537	Myotis daubentonii	M
A2542_1_1	Nycteribia kolenatii	M	no	2019-09-18	Fall	Dealul Bechir	Mine	A2542	Myotis daubentonii	M
A2542_1_2	Nycteribia kolenatii	M	no	2019-09-18	Fall	Dealul Bechir	Mine	A2542	Myotis daubentonii	M
A2542_1_3	Nycteribia kolenatii	M	no	2019-09-18	Fall	Dealul Bechir	Mine	A2542	Myotis daubentonii	M
A2542_1_4	Nycteribia kolenatii	M	no	2019-09-18	Fall	Dealul Bechir	Mine	A2542	Myotis daubentonii	M
A2542_2_1	Nycteribia kolenatii	F	no	2019-09-18	Fall	Dealul Bechir	Mine	A2542	Myotis daubentonii	M
A2542_2_2	Nycteribia kolenatii	F	no	2019-09-18	Fall	Dealul Bechir	Mine	A2542	Myotis daubentonii	M
A2542_2_3	Nycteribia kolenatii	F	no	2019-09-18	Fall	Dealul Bechir	Mine	A2542	Myotis daubentonii	M
A2542_2_4	Nycteribia kolenatii	F	no	2019-09-18	Fall	Dealul Bechir	Mine	A2542	Myotis daubentonii	M
A2545_1_1	Nycteribia kolenatii	F	no	2019-09-18	Fall	Dealul Bechir	Mine	A2545	Myotis daubentonii	M
A2545_1_2	Nycteribia kolenatii	F	no	2019-09-18	Fall	Dealul Bechir	Mine	A2545	Myotis daubentonii	M
A2549_1_1	Nycteribia kolenatii	M	no	2019-09-18	Fall	Dealul Bechir	Mine	A2549	Myotis daubentonii	M
A2549_2_1	Nycteribia kolenatii	F	no	2019-09-18	Fall	Dealul Bechir	Mine	A2549	Myotis daubentonii	M
A2549_2_2	Nycteribia kolenatii	F	no	2019-09-18	Fall	Dealul Bechir	Mine	A2549	Myotis daubentonii	M
A2557_1_1	Phthiridium biarticulatum	M	no	2019-09-18	Fall	Dealul Bechir	Mine	A2557	Rhinolophus ferrumequinum	M
A2567_1_1	Penicillidia conspicua	F	no	2019-09-18	Fall	Dealul Bechir	Mine	A2567	Miniopterus schreibersii	M
A2573_1_1	Phthiridium biarticulatum	M	no	2019-09-19	Fall	Dealul Bechir	Mine	A2573	Rhinolophus ferrumequinum	F
A2575_1_1	Phthiridium biarticulatum	M	no	2019-09-19	Fall	Dealul Bechir	Mine	A2575	Rhinolophus ferrumequinum	F
A2577_1_1	Phthiridium biarticulatum	M	no	2019-09-19	Fall	Dealul Bechir	Mine	A2577	Rhinolophus ferrumequinum	F
A2578_1_1	Nycteribia schmidlii	F	no	2019-09-19	Fall	Dealul Bechir	Mine	A2578	Miniopterus schreibersii	M
A2579_1_1	Nycteribia kolenatii	F	no	2019-09-19	Fall	Dealul Bechir	Mine	A2579	Myotis daubentonii	M
A2580_1_1	Nycteribia schmidlii	F	no	2019-09-19	Fall	Dealul Bechir	Mine	A2580	Miniopterus schreibersii	M
A2582_1_1	Nycteribia kolenatii	M	no	2019-09-19	Fall	Dealul Bechir	Mine	A2582	Myotis daubentonii	M
A2582_1_2	Nycteribia kolenatii	M	no	2019-09-19	Fall	Dealul Bechir	Mine	A2582	Myotis daubentonii	M
A2582_1_3	Nycteribia kolenatii	M	no	2019-09-19	Fall	Dealul Bechir	Mine	A2582	Myotis daubentonii	M
A2582_2_1	Nycteribia kolenatii	F	no	2019-09-19	Fall	Dealul Bechir	Mine	A2582	Myotis daubentonii	M
A2582_2_2	Nycteribia kolenatii	F	no	2019-09-19	Fall	Dealul Bechir	Mine	A2582	Myotis daubentonii	M
A2582_2_3	Nycteribia kolenatii	F	no	2019-09-19	Fall	Dealul Bechir	Mine	A2582	Myotis daubentonii	M
A2588_1_1	Nycteribia kolenatii	M	no	2019-09-19	Fall	Dealul Bechir	Mine	A2588	Myotis daubentonii	M
A2597_1_1	Phthiridium biarticulatum	M	no	2019-09-19	Fall	Dealul Bechir	Mine	A2597	Rhinolophus mehelyi	M
A2597_2_1	Phthiridium biarticulatum	F	no	2019-09-19	Fall	Dealul Bechir	Mine	A2597	Rhinolophus mehelyi	M
A2598_1_1	Nycteribia kolenatii	M	no	2019-09-19	Fall	Dealul Bechir	Mine	A2598	Myotis daubentonii	F
A2598_1_2	Nycteribia kolenatii	M	no	2019-09-19	Fall	Dealul Bechir	Mine	A2598	Myotis daubentonii	F
A2598_1_3	Nycteribia kolenatii	M	no	2019-09-19	Fall	Dealul Bechir	Mine	A2598	Myotis daubentonii	F
A2598_1_4	Nycteribia kolenatii	M	no	2019-09-19	Fall	Dealul Bechir	Mine	A2598	Myotis daubentonii	F
A2598_2_1	Nycteribia kolenatii	F	no	2019-09-19	Fall	Dealul Bechir	Mine	A2598	Myotis daubentonii	F
A2598_2_2	Nycteribia kolenatii	F	no	2019-09-19	Fall	Dealul Bechir	Mine	A2598	Myotis daubentonii	F
A2598_2_3	Nycteribia kolenatii	F	no	2019-09-19	Fall	Dealul Bechir	Mine	A2598	Myotis daubentonii	F
A2601_1_1	Nycteribia kolenatii	M	no	2019-09-19	Fall	Dealul Bechir	Mine	A2601	Myotis daubentonii	M
A2601_1_2	Nycteribia kolenatii	M	no	2019-09-19	Fall	Dealul Bechir	Mine	A2601	Myotis daubentonii	M
A2603_1_1	Nycteribia kolenatii	M	no	2019-09-19	Fall	Dealul Bechir	Mine	A2603	Myotis daubentonii	M
A2603_1_2	Nycteribia kolenatii	M	no	2019-09-19	Fall	Dealul Bechir	Mine	A2603	Myotis daubentonii	M
A2603_1_3	Nycteribia kolenatii	M	no	2019-09-19	Fall	Dealul Bechir	Mine	A2603	Myotis daubentonii	M
[truncated: 2,123 more rows]
